# Supplementary material
Source: ML conference proceedings conference paper supplement (https://proceedings.neurips.cc/paper_files/paper/2022/hash/6e4df3406bcf04443ea26d5695454355-Abstract.html)
Supplement: Supplementary file 1 [file 6e4df3406bcf04443ea26d5695454355-Supplemental-Conference.zip]

Archive with 2 entries (2 files):
- supp/output.html
- supp/paper_with_appendix.pdf
