# Supplementary material
Source: ML conference proceedings conference paper supplement (https://proceedings.neurips.cc/paper_files/paper/2022/hash/6e4df3406bcf04443ea26d5695454355-Abstract.html)
Supplement: Supplementary file 1 [file 6e4df3406bcf04443ea26d5695454355-Supplemental-Conference.zip › supp/output.html]

 
 
 
div.gallery {  margin: 5px;
  border: 1px solid #ccc;
  float: auto;
  width: 1000px;
}

div.gallery:hover {
  border: 1px solid #777;
}
div.gallery img {
  width: 200px;
  height: auto;
}

div.desc {
  text-align: left;
}
 
 
 
 
 
   
 
   
      Human Annotation:   A large brown dog is standing in the water. There are small waves in the water around the dog. The dog is wearing a red collar around its neck.  
      BEST:   This image features a large, brown dog standing in a body of water. The dog is a mastiff breed, and is shown brindle in color. He is a muscular dog, and appears to be standing confidently in the water. 
 
      Socratic Model:   An image of a dog at an outdoor kennel. 
 
      BLIP:   A large brown dog standing in a body of water 
 
      BEST with only tags:   This image features a brindle mastiff and bullmastiff mix breed dog. The mastiff is a large, muscular dog breed known for its strength, courage and protective instincts. The bullmastiff is a large, powerful dog breed that was bred to guard estates and property. This image showcases the similarities between these two breeds, with both dogs exhibiting the brindle coat pattern. 
 
 

 
 
   
 
   
      Human Annotation:   A table has some items on it. The table is made of wood. There is a donut on a plate. The donut is made of chocolate. The plate is white. The plate is round. There is a cup of coffee on the table. The cup is white with a blue rim. The is a backpack by the cup and plate. The backpack is brown and white. There is a book on the backpack. The book is a paperback. The table is by a wall. The table has a chair by it. 
      BEST:   This image features a doughnut and a cup of coffee on a table. The doughnut is chocolate and glazed and the coffee is black. There is also a daypack visible in the image, as well as some straps that may be used to hold the backpack in place. 
 
      Socratic Model:   Home office sink with book and coffee. 
 
      BLIP:   A doughnut and a cup of coffee on a table 
 
      BEST with only tags:   This image is of a coffee and donut in a daypack. The donut is labelled the "donut of shame" as it is a bit battered and not as fresh looking as the coffee. 
 
 

 
 
   
 
   
      Human Annotation:   There are two skyscrapers. There is also a train going around a track above the road. The traffic lights are lit to red and green. There are palm trees to the left.  
      BEST:   This image shows a train traveling over a bridge over a street in Las Vegas. The train is a monorail, and is traveling next to tall buildings and the Stratosphere casino. There is a blinking red light on the train, and a blinking green light on the bridge. 
 
      Socratic Model:   A photo of an indoor parking garage. 
 
      BLIP:   A train traveling over a bridge over a street 
 
      BEST with only tags:   This image is of the Las Vegas Monorail. It is a high-speed, driverless railway system that runs on a single beam. The Monorail connects the Las Vegas Strip to the Las Vegas Convention Center and other major hotels, including the Stratosphere, MGM Grand, and Sahara. 
 
 

 
 
   
 
   
      Human Annotation:   A man is in a black wetsuit. The man is riding a white surfboard. There is a large wave in the water the man is surfing on.  
      BEST:   This image captures a surfer performing a cutback maneuver at the Superbank surf competition. The surfer is positioned in the middle of the frame and is relatively small in comparison to the surrounding waves. The waves are large and crashing, providing an impressive backdrop for the surfing action. 
 
      Socratic Model:   A person is surfing on a wave at a medina. 
 
      BLIP:   A man riding a wave on top of a surfboard 
 
      BEST with only tags:   This image captures a surfer cutting back in a competition at the Superbank. The surfer is Bruna Surfistinha and the competition is the Chris Ward Surf Invitational. The waves are huge and the surfer is doing a great job of carving through them. 
 
 

 
 
   
 
   
      Human Annotation:   The people are standing up on the bus. Some of the seats are occupied on the bus. There's a boy on the front of the bus and a yellow shirt sitting down. There's a woman in a green shirt looking out of the window on the bus. There's a man taking a picture of the top of the bus. The camera he is holding is black. He is wearing a watch on his right wrist. 
      BEST:   This image captures a man taking a picture of a group of people on a bus. The bus is a San Diego Transit bus, the type of bus used by the Regional Transportation District (RTD) in Denver, Colorado. The bus has the distinctive flxible metro style, common on buses in the Memphis Area Transit Authority system. 
 
      Socratic Model:   A shot of the interior of a public bus or train, with many people seated or standing in the aisles. 
 
      BLIP:   A man taking a picture of a group of people on a bus 
 
      BEST with only tags:   This image depicts a bus and a trolley in San Diego, California. The bus is a San Diego Transit vehicle, while the trolley is a Flexible Metro from the Memphis Area Transit Authority. Both modes of transportation are seen in operation, with passengers boarding and disembarking. This photograph captures the everyday bustle of public transit in a major metropolitan area. 
 
 

 
 
   
 
   
      Human Annotation:   A red fire hydrant with a white top and a black knit cap on top of it sits on a sidewalk at the side of a parking lot.  The hydrant is casting a shadow on the sidewalk where leaves are scattered around it. There is a manhole cover a bit down from the hydrant.  Behind the manhole cover is a small area with small green shrubs and mostly covered by leaves.  At the end of the sidewalk are rows of cars with a store in the far back. A couple of people are near their cars in the parking lot.  At the end of one row of cars is a wooden fence with a brick building behind it.  
      BEST:   This image is a red fire hydrant that is sitting on the side of the road. The fire hydrant has a black hat on top of it and it is made out of metal. The hydrant is red and the hat is black. The hat might be used to keep the hydrant from freezing in the winter. 
 
      Socratic Model:   The fire hydrant stands out against the snowy background. 
 
      BLIP:   A red fire hydrant sitting on the side of a road 
 
      BEST with only tags:   This image shows a firefighter in front of a fire hydrant. The firefighter is wearing a fire hat and has a woodford hydrant. The freeze proof hydrant is behind the woodford hydrant. 
 
 

 
 
   
 
   
      Human Annotation:   In a dark sepia color photograph the top half of a large, very tall clock tower is shown. The tower appears to be at least a few centuries old and could be the Big Ben clock tower in London. The time shown on the clock is eight o'clock, and  the clock face is on two sides of the tower. The tower tapers off high into the sky. Above the clock face are poles and a gable decorated, and in a deep ivory color.  
      BEST:   This image is of a clock tower. The first fear is written on the clock face in large letters. Clock towers are often used in horror movies to create suspense and fear. This particular clock tower is located in Dubuque, Iowa. It is also featured in the Milwaukee City Hall. 
 
      Socratic Model:   The bell tower of the city hall ticks away the hours. 
 
      BLIP:   A tall tower with a clock at the top of it 
 
      BEST with only tags:   This image is of a clock tower in the distance. It is possibly in Dubuque, Iowa, as there is a similar town clock in the background. In front of the tower is Milwaukee City Hall, which has a clock tower as well. The image is atmospheric and moody, with a feeling of dread or fear. 
 
 

 
 
   
 
   
      Human Annotation:   A man is riding a skateboard on a ramp.There are a couple of other men sitting at the top of the ramp talking and watching him ride. Another man at the top of the ramp is standing up, holding a drink in one hand and a cigarette in the other. Behind this man is a building. There is another person coming through the door of this building. 
      BEST:   This image features a skateboarder performing a skate trick on a vert ramp at the Hazard County Skatepark. The skateboarder is wearing pants and a cap, and is performing a difficult skate trick. To the right of the image, several fans are sitting in the stands. In the background, snowboarders can be seen boarding down a mountain. 
 
      Socratic Model:   A person skateboarding in a performance arena. 
 
      BLIP:   A man riding a skateboard up the side of a ramp 
 
      BEST with only tags:   This image is of skatelab, a Jam skating facility in hazard county skatepark. It shows several skaters enjoying the vert ramp. 
 
 

 
 
   
 
   
      Human Annotation:   A store named the Running Room is to the left of the road.  A yellow school bus is parked next to the store.  There are people in running clothes lined up the side of the building.  Large windows surround the first level of the store.  Some bikes are leaned up against the front of the building.  There are clouds in the sky and electrical wires are on poles above the road. 
      BEST:   This image is of a group of people who appear to be waiting to enter a running room. The people are standing on a sidewalk and most are wearing athletic clothing. In the background, there is a yellow school bus parked on the side of the road. 
 
      Socratic Model:   Runners in a fastfood restaurant. 
 
      BLIP:   A group of people standing outside of a running room 
 
      BEST with only tags:   This image is of a marathon coach and two runners. The marathon coach is giving instructions to the runners and they are getting ready to run. There is a banner in the background that says "Run Around". 
 
 

 
 
   
 
   
      Human Annotation:   This picture is taken inside of a home. A couch is sitting with a brown table in front of it. A wooden table and chairs is sitting behind the couch. A large window is sitting in front of the table with curtains in front of it. The walls of the room have picture frames hanging on them. A black and white oven can be seen sitting in a kitchen near the living room. 
      BEST:   This image is of a living room in an in law apartment. The living room has a white stove and oven, a brown headboard, an orange blanket, and a blue couch. There is also a picinic table, a dining chair, and a stroller. 
 
      Socratic Model:   A group of friends hanging out together in their apartment, enjoying a night in front of the television. 
 
      BLIP:   A living room filled with furniture and a kitchen 
 
      BEST with only tags:   This image is of a living room in an in law apartment. The living room has a couch, coffee table, and TV. There is also a small kitchenette in the room with a stove and refrigerator. 
 
 

 
 
   
 
   
      Human Annotation:   There are four jets flying in the sky together. Each jet is leaving a trail of puffy white smoke behind the other one. The sky is a bright blue.  
      BEST:   This image features a group of jets flying through a blue sky. The jets have sharp tails and are a navy blue color. The blue angels are a famous squadron of navy jets, and the patriots jet team is also a popular aerial display. This image is great for capturing the power and excitement of a jet show. 
 
      Socratic Model:   A photo of an airplane in an outdoor setting. 
 
      BLIP:   A group of jets flying through a blue sky 
 
      BEST with only tags:   This image features four jet aircraft in formation. The aircraft are all a deep blue color and seem to be flying towards the camera. In the background, there is a clear blue sky with some white clouds. This image is likely from an air show or other public event and is meant to show off the patriotism and power of the jet teams involved. 
 
 

 
 
   
 
   
      Human Annotation:   A pasture with a lot of green grass with a fence around the area.  The grass is short and some is tall along the bottom of the fence.  The sign in front of the fence says stop on it and it is red and white with a triangle in the middle. 
      BEST:   This image is of a stop sign sitting on the side of a road. The stop sign is red and white and is octagonal in shape. The stop sign is sitting in front of a fence, and there are no other objects in the image. 
 
      Socratic Model:   This is a photo of a stop sign. 
 
      BLIP:   A red and white stop sign in front of a fence 
 
      BEST with only tags:   This image is a photograph of a metal sign that reads "CLET - Give Way" in white lettering against a green background. There is a smaller sign below it that reads "No Stopping" in white lettering against a red background. 
 
 

 
 
   
 
   
      Human Annotation:   This is a photo of three young boys wearing cubs uniforms, how unfortunate. They are ready to play a baseball game, as two of the boys are wearing baseball mitts and one of the boys is even wearing war paint. The boy in front looks very happy, which is to be expected when playing team sports. Go team. 
      BEST:   This image features a couple of young baseball players in their cubs uniforms. The boy on the right is holding a bat and the boy on the left is holding a catcher's mitt. In the background, there is a field with other young players standing on it. 
 
      Socratic Model:   A photo of three people at a baseball field. 
 
      BLIP:   A couple of young boys standing on top of a field 
 
      BEST with only tags:   This image shows the Iowa Cubs players in their team uniforms. The players are all young, most likely little league age, and they are in formation on the pitcher's mound. The Cubs logo is prominently displayed on their jerseys and caps. This image captures the excitement and anticipation of young players about to take the field and play America's favorite pastime. 
 
 

 
 
   
 
   
      Human Annotation:   a kitchen that has a brown wooden floor,wooden brown cabinets with a white stove and white refrigerator. the sink is empty and clean along with the counter which is white in color with a window above the sink which has brown blinds. 
      BEST:   This image shows a kitchen with white appliances and wooden cabinets. The stove is in the middle of the image and the refrigerator is on the right. There is also a sink on the left. 
 
      Socratic Model:   A photo of a kitchen, with a stove, kitchen range, and range hood. 
 
      BLIP:   A kitchen with white appliances and wooden cabinets 
 
      BEST with only tags:   This image is of a kitchen that has been remodeled. It is a galley style kitchen with an oak cabinet. There is a sink, stove, and refrigerator in the kitchen. The countertops are granite and the flooring is wood. 
 
 

 
 
   
 
   
      Human Annotation:   There are people standing in a room. There are signs on the walls behind them. There are three scooters that have luggage on top of them in front of the people.  
      BEST:   This image shows a group of people gathered around luggage carts at an airport. There is a mix of different types of luggage, including suitcases, backpacks, and duffel bags. There are also a few people in the image who are not carrying any luggage. 
 
      Socratic Model:   People waiting in an airport terminal. 
 
      BLIP:   A group of people standing around carts with luggage 
 
      BEST with only tags:   The image shows several people waiting in a line at an airport baggage claim. The airport is likely in China, as both Pudong and Shenzhen airports are located there. Beijing airport is also located in China. All three airports are major international hubs, with flights arriving from all over the world. 
 
 

 
 
   
 
   
      Human Annotation:   A worn wooden building is on the side of a set of train tracks.  The building has many windows with screens over the windows.  Many of the screens are torn or missing.  The paint on the building is severely thinned and peeling.  A small foliage bush is at the front of the building.  Tall mountains are in the far distance.  A large metal structure is suspended in the air above the building and the train tracks. 
      BEST:   This black and white photo shows an old train station that is now abandoned. The train itself looks quite old and is in the middle of the image, taking up most of the space. There are other objects in the image such as a funicular and cog railroad, but the old train is the main focus. 
 
      Socratic Model:   Abandoned railcar at a forgotten railway platform. 
 
      BLIP:   A black and white photo of an old train 
 
      BEST with only tags:   This image features an abandoned train station. The station is located in the canfranc international railway station, and is part of the durango and silverton narrow gauge railroad. The funiculaire can also be seen in the background, as well as the cog railroad. 
 
 

 
 
   
 
   
      Human Annotation:   The truck is parked on the pavement. The pavement is faded in some areas. There is a large white sign with a blue banner across the top at the other end of the pavement. At the front of the photo there is a white and orange U-haul truck. It has large black framed window protruding from the side windows. The window are rolled up and no on sitting in the diver side seat.   
      BEST:   This image features a van parked next to a tower or truck with a phone number on it. The door of the truck is at the right side of the image and is moderate-sized. There is also a U-Haul truck rental in the image. This location is likely an airport, as Mojave and Victorville are both airports in California. 
 
      Socratic Model:   A busy service area with a delivery truck and a van. 
 
      BLIP:   A white truck parked in a parking lot 
 
      BEST with only tags:   This image is of a uhaul truck rental parked in front of a building that is most likely the victorville airport. In the background, there is a small plane taxiing on the runway. This image is from Mesilla Valley Transportation, a company that offers shuttle service to and from the airports in Marana, Mojave, and Victorville. 
 
 

 
 
   
 
   
      Human Annotation:   A window is on a white building. There is a black cover over the window. There is a small white microwave on a small table. There is a plant on the ground.  
      BEST:   In this image, there is a winegard outdoor TV antenna, a small box TV, and a satellite TV dish. The toaster oven is at upper middle of the image and is small in the image. 
 
      Socratic Model:   The shopfront of a busy deli. 
 
      BLIP:   A microwave oven sitting on a stand next to a potted plant 
 
      BEST with only tags:   This image is of a large, outdoor TV. The TV is mounted to a box that sits on the ground, and it has a satellite dish attached to it. There is also a small, music box TV next to it. 
 
 

 
 
   
 
   
      Human Annotation:   A young woman with her hair pulled back in a ponytail sits on a tiled bathroom floor, resting her arm on a white toilet seat, and resting her head on her arm. She is wearing shorts, and a brown short-sleeved shirt. There is a lavender-colored rug underneath her, and a white tiled wall on her left side. A toilet cleaning brush is tucked behind the toilet, on the woman's right side. A brown bathroom cabinet is also to the right of the woman.   
      BEST:   The image shows a woman in the fetal position with her head down, as if she is about to vomit. The toilet in the background is plunging, and there is water and what looks like feces around it. There are also hemorrhoids on the woman's buttocks. 
 
      Socratic Model:   Alcohol may be a depressor, but it's sure brought these two friends closer together! 
 
      BLIP:   A woman sitting on a toilet in a bathroom 
 
      BEST with only tags:   This image shows a woman in the fetal position, with her head down and her arms tucked in, as she plunges a toilet. This image is meant to show the causes of hemorrhoids, as the woman is pushing hard to try and dislodge whatever is causing the blockage. The toilet gifs are meant to show the drainage process, and how a drainage kit can help. 
 
 

 
 
   
 
   
      Human Annotation:   There is a tall spotted giraffe standing on the ground. There is a wood hut behind the giraffe. There are tall trees on the other side of the hut. There is a small wood fence. 
      BEST:   This image features a giraffe standing in front of a wooden building in a zoo. The giraffe is a large, imposing figure in the image, with its long neck and towering height. The building behind it is small and unremarkable, seeming to pale in comparison to the giraffe. 
 
      Socratic Model:   A giraffe stands on stilts in an enclosure at a zoo. 
 
      BLIP:   A giraffe standing in front of a wooden building 
 
      BEST with only tags:   This image features a giraffe walking around in a zoo exhibit. The giraffe is a tall, slender animal with a long neck and legs. It has a brown and white coat, and its eyes are black. In the background, there is a large omnibed where zoo visitors can get up close to the animals. 
 
 

 
 
   
 
   
      Human Annotation:   A batter is swinging his bat to hit the baseball. He is wearing a black helmet and a white uniform. The catcher is behind him with a red mask on his face, and behind him is the umpire with a black helmet. There is green grass on the field. 
      BEST:   This image is of a group of men playing baseball. The focus of the image is on the batter who is about to steal home. The catcher is crouching in front of the plate and the umpire is in the background. The outfielders are positioned in the background as well. 
 
      Socratic Model:   A baseball player about to hit the ball. 
 
      BLIP:   A group of men on a field playing baseball 
 
      BEST with only tags:   This image is of a baseball batter about to steal home. The catcher is in the process of throwing the ball to the pitcher, who is just about to make the tag at home plate. The runner has already taken off from third base and is headed for home. This would be an exciting play to watch in a baseball game. 
 
 

 
 
   
 
   
      Human Annotation:   A vase sits on top of a white surface. The vase is half filled up with a clear liquid. The vase has long green stems placed inside of the clear liquid. There are yellow flowers on top of the long green stems. The room the vase with flowers is in is white. There are red spots on the yellow flowers. The wall behind the flowers is white. 
      BEST:   This image includes close-up shots of daffodils and jonquils in a vase. The flowers are brightly coloured and in full bloom, with their petals stretching outwards. The chives in the background give a sense of depth to the photograph. 
 
      Socratic Model:   A beautiful jonquil in a simple vase. 
 
      BLIP:   A vase filled with yellow flowers sitting on a table 
 
      BEST with only tags:   This image features a vase of daffodils and jonquils in bloom. The flowers are surrounded by greenery, and the vase sits on a white background. The image is simple, but elegant, and it captures the beauty of springtime. 
 
 

 
 
   
 
   
      Human Annotation:   A tall, rusty metal fence with bobbed wire is enclosing a lot.The lot has many small weeds growing and there is a cage inside this lot that encloses two trucks and there are some tall buildings behind this small cage. Trash is lying on the sidewalk in front of the fence. There are two manholes on the sidewalk and the sidewalk appears to be cracked. There is also a sign posted on the bobbed fence. 
      BEST:   This image is a warning sign that tells people that a flood can happen anywhere. The sign is on a chain link fence, and it has a picture of a flood on it. 
 
      Socratic Model:   A photo of an industrial area that may be prone to flooding. 
 
      BLIP:   A sign on a chain link fence that says a flood can happen anywhere 
 
      BEST with only tags:   This image shows a city surrounded by water, with a warning sign for a possible flood. The flood appears to be coming from the river in the background, and is already flooding some of the lower parts of the city. This could be a warning for people in the area to evacuate, as a flood could be imminent. 
 
 

 
 
   
 
   
      Human Annotation:   There is a brown baseball mitt on top of a colorful blanket. The blanket has colorful stripes on it. There is a white baseball inside of the mitt. 
      BEST:   In this image, there is a baseball in a catcher's mitt on a blanket. There are also baseball gloves, or baseball glove, or red baseball glove shown in the upper middle of the image and it is large in the image. The baseball glove is red and it is the Texas Rangers baseball team. The baseball cupped, or baseballs, or cardinal baseball is shown in the middle of the image and it is moderate-sized in the image. 
 
      Socratic Model:   A glove and ball left behind after a game of catch. 
 
      BLIP:   A baseball mitt and a baseball sitting on a blanket 
 
      BEST with only tags:   This image is of a baseball glove. The glove is red and has the Texas Rangers logo on it. The glove looks to be in good condition and looks like it would be a good fit for someone with larger hands. 
 
 

 
 
   
 
   
      Human Annotation:   An animal is laying down. The animal is brown. There are trees on the mountains that are green. The trees are tall. The mountains are tall with grass on them. The animal has horns on its head. The clouds in the sky are white. There are clouds near the mountains. The animal has a large bone in his back.  
      BEST:   This image features a brown cow laying down on a grassy field. The cow is facing the viewer, and there are mountains in the background. This image is from Switzerland, and the cow is a Brown Swiss breed. 
 
      Socratic Model:   A bovine in its natural habitat. 
 
      BLIP:   A cow laying down in a field with mountains in the background 
 
      BEST with only tags:   This image is of a brown Swiss cow in a pasture in the Swiss Alps. The cow has a beautiful, thick coat of brown fur, and is grazing on the lush grass. The background is a stunning view of the jagged mountain peaks and pristine blue sky. This image captures the natural beauty of Switzerland and its cows. 
 
 

 
 
   
 
   
      Human Annotation:   The tennis player is in the court. She is wearing white top and bottom. Her sneakers are with with black cleats on them. She is holding a racket. The racket is black and yellow. Her hair is up in a pony tail. Her pony tail is pink. The fence is a tarpaulin with pole in between. Spectators are behind the fence watching. 
      BEST:   This image captures a tennis match between Tatiana Golovin and Sabine Lisicki. In the image, Golovin is playing a forehand and Lisicki is playing a backhand. Both players are dressed in tennis outfits and are wearing sunglasses. There is a cameraman taking pictures and there are several other spectators watching the match. 
 
      Socratic Model:   Two tennis players compete in a semifinal match. 
 
      BLIP:   A woman in a white dress playing a game of tennis 
 
      BEST with only tags:   This image is of Tatiana Golovin and Sabine Lisicki playing in the 2009 Wimbledon Championships. They are both wearing white tennis skirts and blue tops. Golovin is on the right and Lisicki is on the left. They are both reaching for the ball and Lisicki seems to be winning the point. In the background, there is a scoreboard with the names of the players and the score. 
 
 

 
 
   
 
   
      Human Annotation:   A white, yellow, and blue train is stopped on the tracks at night. The train has lots of windows, and the doors on each car are yellow. There is a skyway over the tracks for pedestrians to cross. The lights in the skyway light it up and the surrounding are is bright, and well lit. The tracks, gravel, and the bricks are wet as if it had just rained. The platform on the side of the train has no customers waiting to load the train.  
      BEST:   This image shows a passenger train on the tracks at night. The white train is in the center of the image and is moderate-sized. It is a Bombardier train. The image is taken from a first-class point of view. 
 
      Socratic Model:   A photo of a railway platform train station. 
 
      BLIP:   A train on a train track at night 
 
      BEST with only tags:   This image shows the hbf (main railway station) in essen, germany. The vlaggen (flags) of the netherlands and germany are flying in the wind, while a desiro train is departing from the platform. The image is captured from a firstclasspov perspective, giving a clear view of the station and its surroundings. 
 
 

 
 
   
 
   
      Human Annotation:   A wooden desk is against the wall. There is a gray and brown chair in front of the desk. There is a small lamp on the desk. There is a bed next to the desk with a red comforter on it. There's a picture hanging on the wall above the bed. 
      BEST:   This image shows a hotel room with a bed, desk and lamp. The bed is a double or brown bed and is moderate-sized in the image. The desk is at left of the image and is small in the image. The lamp is on the desk and is moderate-sized in the image. The bathroom is to the right of the image and has a white toilet and sink. The light is at right of the image and is small in the image. 
 
      Socratic Model:   This photo looks like it was taken in a hotel room. There's no one in the photo, but I imagine someone staying in this room would have a comfortable stay. 
 
      BLIP:   A hotel room with a bed, desk and lamp 
 
      BEST with only tags:   This image is of a standard hotel room, with a queen bed and a desk. The room appears to be well-used, with some scratches and scuff marks on the furniture and walls. The bedding is rumpled and there are several items on the desk, including a phone, lamp, and a Gideon Bible. 
 
 

 
 
   
 
   
      Human Annotation:   A blue plate is sitting on the ground. There are a stack of donuts on the plate. There are colorful candles sticking out of the donuts.  
      BEST:   This image features a blue plate with several colorful donuts. The donuts are topped with sprinkles, and some have other decorative toppings as well. One doughnut is topped with a candle, making it look like a birthday cake. 
 
      Socratic Model:   A group of friends celebrates a birthday with a variety of sweet treats. 
 
      BLIP:   A blue plate topped with donuts covered in sprinkles 
 
      BEST with only tags:   This image features a pink cake donut with sprinkles on top. It is surrounded by other colorful cake donuts, as well as two graffe pastries. A single candle is lit on the top of the pink donut, celebrating a birthday. 
 
 

 
 
   
 
   
      Human Annotation:   A long red train with a black front car is traveling across a railroad track suspended in the air by tall stone pillars.  The Train has a long white billow of smoke emitting from its engine and trailing behind it as it goes.  Beneath the suspended tracks are thickets of green trees and foliage.  The train is also completely surrounded by tall trees and thick foliage.  The sky is white with clouds. 
      BEST:   This image features a small train, or train featured., or train says steamrail is at middle of the image and is moderate-sized in the image. The train is traveling over a wooden bridge, and the scenery in the background is lush and green. This image is perfect for anyone who loves trains and nature. 
 
      Socratic Model:   A viaduct or bridge spans a valley or railway track. 
 
      BLIP:   A steam engine train traveling over a wooden bridge 
 
      BEST with only tags:   This image is of the Puffing Billy locomotive travelling over the Kinsol Trestle in the Redwood Valley Railway. The Puffing Billy is a steam-powered locomotive that runs through the hills of Victoria, Australia. The Kinsol Trestle is a trestle bridge that spans over a valley and was once the tallest railway bridge in Canada. 
 
 

 
 
   
 
   
      Human Annotation:   The desk has laptops on it. Two of the laptops are turned off. There are two desktops to the right of the laptops. The two desktops are on. The desk is made of wood. There is a glass on a coaster to the right of the desktop computer. There's a garbage can underneath the cabinet under the desk. There is a shelf over the desk that has books on it. 
      BEST:   This image shows a computer desk with a laptop on it and two monitors. There is a lot of clutter on the desk, including papers, a pen, a mug, and various other objects. There is also a large varidesk on the desk which is used to stand and work at the computer. 
 
      Socratic Model:   This is a photo of many people working at computer stations in a room. 
 
      BLIP:   A computer desk with a laptop and two monitors 
 
      BEST with only tags:   This image is of a computer workstation with a varidesk. The workstation has two monitors, a keyboard, and a mouse. There is also a laptop on the desk. 
 
 

 
 
   
 
   
      Human Annotation:   A group of kids and teenagers are posing for a picture on a tennis court.  An adult instructor is standing at the far right of the kids.  A net is behind them and the court ground is dark green with white painted lines.  There are tennis balls on the ground in front of the kneeling kids.  A chain link fence is behind the court and a group of trees is in the background.  Everyone is wearing shorts, t-shirts and sneakers. 
      BEST:   This image features a group of people, all of whom are standing on a tennis court. The people in the image are all dressed in appropriate tennis gear, and each is holding a racquet of some kind. In the background, there is a fence and beyond that, some trees. 
 
      Socratic Model:   A group of people enjoying a game of tennis. 
 
      BLIP:   A group of people standing on top of a tennis court 
 
      BEST with only tags:   This image features the Bollettieri Tennis Academy, which is a well-known junior tennis training center. The academy is situated in Bradenton, Florida and has produced many top tennis players, such as Andre Agassi, Monica Seles, and Jim Courier. The academy has a kids' court that is visible in this image, as well as a grand slam tennis court in the background. 
 
 

 
 
   
 
   
      Human Annotation:   Two people are riding a motorcycle on a city street on a sunny day. the bike is turning the corner on the left near a water puddle. There are other biked parked on the sidewalk on the right in front of a cafe. A man and woman and two kids are walking down the street away from the camera behind the motorcycle. There are two large trees on the left side of the street providing shade tot he walkers.  
      BEST:   This image is of a man riding a motorcycle down a street. He is wearing a helmet and sunglasses, and the street is lined with trees. There are also some buildings in the background. 
 
      Socratic Model:   A photo of many people in a busy street. 
 
      BLIP:   A person riding a motorcycle down a street 
 
      BEST with only tags:   This image shows a street in Siem Reap with buildings on each side. The street is wide and has a median in the middle with trees. There are also some people walking on the street. In the background, there is a hill with buildings on it. 
 
 

 
 
   
 
   
      Human Annotation:   This is a photo of a boy riding a skateboard, he is in mid air and doing a trick. In the background you can see three other boys judging his trick although they do not all have skateboards himself. The weather looks beautiful, clear skies and beautiful green trees. The boy himself looks to be maybe 14 or 15 years old. 
      BEST:   In this image, a man is skateboarding on a ramp and doing a trick in the air. 
 
      Socratic Model:   A group of skateboarders show off their tricks in front of a surprised crowd. 
 
      BLIP:   A man on a skateboard doing a trick in the air 
 
      BEST with only tags:   In this image, a skateboarder is performing a wallie. A wallie is a type of skateboarding trick where the skateboarder jumps up onto a wall and then back down to the ground. The skateboarder in this image is performing a wallie on a ramp. This image was taken at the DC skateboarding Jam skating event. 
 
 

 
 
   
 
   
      Human Annotation:   The image is a close-up of a bottle of water sitting on a park bench. The bench is sitting outside of a fenced area. On the other side of the fence is a brown field with green grass and green trees in the distance. The bench is silver and has ridges on the seat. A plastic water bottle on the bench has a blue label and cap. The cap is on the bottle. Behind the fence is some dirt. The sky is blue with few clouds. It is a sunny day because there are shadows.  
      BEST:   This image features a bottle of water sitting on top of a metal bench. The bottle is large in the image, and it appears to be a sports drink or bottled water. There is also a metal bench in the background, as well as some aluminum bleachers. This image is about hydration and staying hydrated while watching a sporting event. 
 
      Socratic Model:   A photo of an empty bench and water bottle in an athletic field. 
 
      BLIP:   A bottle of water sitting on top of a metal bench 
 
      BEST with only tags:   This image shows a person sitting on aluminum bleachers and drinking from a bottle of Gatorade. It is a good representation of how Gatorade can help people stay hydrated when they are participating in sports or other physical activities. 
 
 

 
 
   
 
   
      Human Annotation:   White cabinets are in a kitchen. There is a window above the sink with white curtains. There is a white microwave on the counter.  
      BEST:   This image is of a kitchen with white cabinets and a sink. The kitchen has a retro feel to it, with the white cabinets and old-fashioned sink. There is a small amount of light in the image, coming from what may be a window in the upper left corner of the photograph. The rest of the image is fairly dark, with only a small amount of light illuminating the countertop and floor. 
 
      Socratic Model:   A person in a kitchen, cooking food on a stove. 
 
      BLIP:   A kitchen with white cabinets and a sink 
 
      BEST with only tags:   This image is of a retro kitchen in the night. It is a small, first kitchen with white cabinets and appliances. There is a light over the sink and a window with a curtain. 
 
 

 
 
   
 
   
      Human Annotation:   A man and woman are standing in front of a white table with a cake and flowers on it. The cake has three layers with white icing and flowers around it. The woman is wearing a white wedding dress, while the man is wearing a uniform shirt and pants. The man is jokingly playing with a knife that is in his hands. There is a stone wall behind the couple with a candle stick in the opening. 
      BEST:   This image captures a moment from a modest wedding ceremony in Ireland. The bride is standing to the left of the image and is smiling broadly, while the best man stands to the right of the image and cuts the cake. The groom is serving himself from the wedding cake, which is decorated with flowers. 
 
      Socratic Model:   Two people celebrating at a reception, with a bayonet and wedding cake on display. 
 
      BLIP:   A man and a woman standing next to a cake 
 
      BEST with only tags:   This image is a photo of a modest wedding in Ireland. The couple is standing in front of a silver wedding anniversary cake, and they are surrounded by flowers. 
 
 

 
 
   
 
   
      Human Annotation:   A small child wearing a red jacket and red snow pants is standing on skis. There is a lady in a white and orange jacket standing on skis next to her. The child is holding black ski poles.  
      BEST:   This is a picture of a woman and a child on skis in the snow. The woman is standing and the child is skiing. They are both wearing skis and ski suits. 
 
      Socratic Model:   Family fun on the ski slopes! 
 
      BLIP:   A woman and a child on skis in the snow 
 
      BEST with only tags:   This image features a happy skier enjoying a day on the slopes at Okemo Mountain in Vermont. The snow is freshly fallen and the landscape is pristine, providing the perfect setting for a day of winter sports. Skiing and snowboarding are popular activities in this part of the country, and the skiers in this image look like they are having a great time. 
 
 

 
 
   
 
   
      Human Annotation:   A white toilet with no lid is sitting outside of a brick building on the concrete ground. The toilet is white and is placed against the brick wall of a building. It is in a corner. A tree is on one side of the toilet. A window is in the wall just above the toilet. There are cracks in the concrete on the ground. A door with a doormat is beside the tree. 
      BEST:   This is a black and white photo of a toilet. The toilet is white and it looks like it is sitting outside of a building next to a bush. 
 
      Socratic Model:   A photo of a toilet. 
 
      BLIP:   A toilet sitting outside of a building next to a bush 
 
      BEST with only tags:   This image is of a toilet throne. It is a Universal Rundle toilet with a Portland Loo in the background. The American Standard toilet is to the right of the Portland Loo. The Toto Drake is to the right of the American Standard toilet. 
 
 

 
 
   
 
   
      Human Annotation:   This is a photo of a busy roadway. Many different vehicles can be seen on the road. A long narrow grass strip is separating the different sides of the roads. Tall lamp poles are lining the roadway. A large blue and white sign is standing on the left side of the roadway. Tall green trees and a long steep hill can be seen in the background of the photo. 
      BEST:   This image captures the traffic on the Subic-Clark-Tarlac Expressway in the Klang Valley region of Malaysia. The expressway is a 4-lane, controlled-access highway that connects the two major metropolitan areas of the country. The image shows several cars and trucks travelling on the highway, as well as an ambulance and a police motorcycle. 
 
      Socratic Model:   A divided highway with many cars and people. 
 
      BLIP:   A busy city street filled with lots of traffic 
 
      BEST with only tags:   This image is of the Tarlac-Pangasinan-La Union Expressway (TPLEX), a toll expressway in the Philippines. The expressway is seen here in the Klang Valley area of Selangor, Malaysia, and is crowded with cars and carreolas (two-wheeled carts). 
 
 

 
 
   
 
   
      Human Annotation:   There are two boats in this picture. One boat is bigger than the other on the left hand side. The sky is very clear and blue. The boat on the left has two towers. The boats are on the water. The water is blue. There is a flag on the pole. There is am S W on the picture. There is a small boat in the background behind the left boat.   
      BEST:   The three yachts in this image are all moderate in size. The one at the left is docked, while the two in the middle are both sailing. The yacht at the left is a Westport Yacht, while the two in the middle are Palmer Johnson Yachts. The Southport Boat at the far right is an Ocean Yacht. 
 
      Socratic Model:   This photo shows a beautiful harbor, with different types of boats docked and waiting to explore the open water. 
 
      BLIP:   A couple of boats are docked at a dock 
 
      BEST with only tags:   This image is of a group of luxury yachts. The largest yacht in the group is a Palmer Johnson, followed by a Southport and two Ocean Yachts. They are all docked in a marina, with the ocean and sky as a backdrop. The yachts are all gleaming white and very luxurious-looking. 
 
 

 
 
   
 
   
      Human Annotation:   There are several people sitting around a table. There is a lady standing in front of the table. There is a white sign behind the table. There is a picture in a frame on the wall next to the sign. 
      BEST:   This image contains a map of Michigan, as well as images of several state officials. The most prominent figure in the image is Michigan Secretary of State AGM, who is pictured at the center of the image. To the Secretary's left is a man representing the Michigan Department of Natural Resources, and to the Secretary's right is a man representing the Michigan DNR. In the background of the image are several other state officials, as well as a table filled with food and drink. 
 
      Socratic Model:   A group of city leaders discuss important matters at a public meeting. 
 
      BLIP:   A group of people sitting around a table 
 
      BEST with only tags:   The image shows a map of Michigan with the locations of the Michigan Secretary of State, the Michigan Department of Natural Resources, and the Michigan AGM highlighted. 
 
 

 
 
   
 
   
      Human Annotation:   A white airplane is taking off from the ground. There is blue writing on the side of the airplane. There are white vans on the ground below it. 
      BEST:   This image is of an Airbus A380, the largest passenger airliner in the world. The plane is flying in foggy conditions, and part of the fuselage can be seen in the lower right corner of the image. There is also a small commercial van visible in the image. 
 
      Socratic Model:   A photo of an airplane on a runway. 
 
      BLIP:   A large passenger jet taking off from an airport runway 
 
      BEST with only tags:   This image is a photograph of an Airbus A380. The photograph was taken from the side, and the plane is shown in profile. The plane has two engines and four passenger decks. The wings are spread out and the tail is upturned. 
 
 

 
 
   
 
   
      Human Annotation:   Three brown and white cows are standing in a field at the base of a hill on a cloudy day. Large boulders, and small bushes stick up out of the grass in various spots around the filed. In the distance there is a group of cows in the grass laying down near a road. Pine trees line the road near them. 
      BEST:   This image shows a group of cows grazing in a meadow. The cows are a mix of brown and white, and some have reddish markings. One cow has its tail up, while another has its back to the viewer. There is also a white horse in the background. 
 
      Socratic Model:   This image shows a large group of cows grazing in a pasture. 
 
      BLIP:   A herd of cows standing on top of a lush green hillside 
 
      BEST with only tags:   This image features cows grazing in a pasture. The cows are a mix of tarentaise and pinzgauer cattle, and they are all happily grazing and enjoying the fresh air. In the background, you can hear the sound of cowbells ringing, adding to the bucolic atmosphere. 
 
 

 
 
   
 
   
      Human Annotation:   There is a traffic light in the picture. The green light is bright. THe traffic light is made of metal. The traffic light is black. There are three different lights in the traffic light. There is red on the top. There is yellow in the middle. There is green on the bottom. Green means to go. There is nothing else in the picture. There is just a traffic light.  
      BEST:   The traffic light in this image is green. It is a moderate-sized object in the image and is located at the left side of the image. This traffic light is a stoplight, which means that it is used to control the flow of traffic. This light is red on the top and green on the bottom. 
 
      Socratic Model:   This photo looks like it was taken at a clean room or ocean with a possible Vitamin D deficiency. 
 
      BLIP:   A traffic light with a green light on it 
 
      BEST with only tags:   The image is of a stoplight. The stoplight is red and has three lights in it. The light in the middle is lit up, meaning that the stoplight is currently red. The light on the left is not lit up, meaning that the stoplight is not currently green. The light on the right is not lit up, meaning that the stoplight is not currently yellow. 
 
 

 
 
   
 
   
      Human Annotation:   This image is of a small dog surfing in the ocean.  The dog has long fur and he is wearing a lifevest to keep him afloat.  He is in the water next to the surfboard, holding onto it with one paw. The water is choppy where he is, so it may be closer to the shoreline. 
      BEST:   This image features a boarder terrier named Berrydog who is boogie boarding. There is also a blue raft or surfboard in the image. The surfboard is in the middle of the image and is blue. Berrydog is at the upper right of the image and is moderate-sized. 
 
      Socratic Model:   A cairn terrier at a raft. 
 
      BLIP:   A dog in a life vest riding a surfboard in the ocean 
 
      BEST with only tags:   This image captures a moment in the Berrydog Surf Dog Competition, where four boarder terriers are boogie boarding in the waves. The dogs seem to be having a lot of fun, and the spectators on the beach are enjoying watching them. 
 
 

 
 
   
 
   
      Human Annotation:   There is a road that has sheep standing on it. There is a person riding a bicycle going down the road in front of them. There is tall grass and trees around the road.  
      BEST:   This image features a person riding a bike down a road next to a herd of sheep. The sheep are standing on top of a lush green field, and the person is gripping the handlebars tightly as they ride by. 
 
      Socratic Model:   A group of people enjoying a day out in the countryside. 
 
      BLIP:   A person riding a bike down a road with a herd of sheep 
 
      BEST with only tags:   This image is of a group of sheep crossing a road. They appear to be having a lot of fun, and one even appears to be leaping over the others. The background is of the clun forest in Wales, and the sheep are all romney sheep, a British breed. 
 
 

 
 
   
 
   
      Human Annotation:   There's a man standing at the top of the hill on skis. The man is wearing a black helmet. The man is also wearing goggles. The coat that the man is wearing is a bright red. The man is holding ski sticks. There are lines in the snow where the man is standing. A man is standing at the top of the hill looking over at the land. The land is covered with snow. 
      BEST:   This photograph features a skier clad in a red jacket making his way down a snowy slope. The ski racer is dwarfed by the imposing mountains in the background, which provide a breathtaking backdrop to the scene. The image is taken at a ski resort in either Hafjell, Geilo, Telemark or Hemsedal, depending on the source. 
 
      Socratic Model:   A fresh blanket of snow awaits skiers and snowboarders at a ski resort. 
 
      BLIP:   A person on skis on a snowy hill 
 
      BEST with only tags:   This image shows a skier in the mountains of Telemark, Norway. The ski resort of Hafjell is in the background, while Geilo and Hemsedal are in the distance. This area is known for its world-class skiing. 
 
 

 
 
   
 
   
      Human Annotation:   A woman and man are standing on a grassy field. A frisbee is soaring in the air towards the woman. The woman is wearing a red sleeveless dress. The man is wearing a short sleeve shirt and shorts. There is a tall brown sculpture standing on the grass near the woman. Large green trees are above the woman. 
      BEST:   In this image, a man in a green shirt and gray shorts is playing a game of frisbee with a woman in a red dress. The woman is pushing, catching, or jumping for the frisbee, while the man is throwing it. 
 
      Socratic Model:   Two people playing Frisbee at a park. 
 
      BLIP:   A man and a woman playing frisbee in a park 
 
      BEST with only tags:   This image shows a group of people playing various games with discs. They appear to be having fun and enjoying themselves. The disc swing looks like it would be a lot of fun, and the playing horseshoes looks like it could be pretty challenging. 
 
 

 
 
   
 
   
      Human Annotation:   A paper plate is filled with a salad. The salad has large, soggy pieces of lettuce. They all have salad dressing on top of them. There is a toasted piece of bread in front of the lettuce. The paper plate is white. 
      BEST:   This image features a large pizza with greens on it. The greens are either kale, spinach, or arugula. There is also a moderate-sized baguette or hoagie roll in the image. 
 
      Socratic Model:   A group of people enjoying pizza and salads at a restaurant. 
 
      BLIP:   A plate with a salad and a sandwich on it 
 
      BEST with only tags:   This image shows a salad made with kale, romaine lettuce, and arugula. It is topped with a mediterranean vinaigrette and served with a side of bread. 
 
 

 
 
   
 
   
      Human Annotation:   A clock sits on the ground. There is a white face with golden hands. There is an ornate black and gold design around the face of the clock which more than doubles the side of the clock. The clock sits on a black surface that appears to be the street. People are standing around the clock and five pairs of shoes are visible.  
      BEST:   This image contains a person wearing red sneakers walking in a dark area. There is also a clock in the image, with the hands at 5 o'clock. The clock is either reflected in a mirror or has its face at the middle of the image. It is a golden or ornate clock, and is moderate in size. 
 
      Socratic Model:   People having a good time despite the hour. 
 
      BLIP:   A gold clock sitting on top of a table 
 
      BEST with only tags:   This image is of a red watch with a corpus clock on the face. The hands of the clock are walking around the face, and the word "Tempus Fugit" is inscribed at the top. The watch is made in Japan. 
 
 

 
 
   
 
   
      Human Annotation:   A man is suspended in the air with his skateboard doing tricks. He is bald, wearing a white shirt with red logo on it. He is also wearing jeans and black shoes. Underneath him is a big gray, cemented ramps. The skate park has few people skateboarding. Farther down the skate park are trees and beyond the trees is a mountain. 
      BEST:   This image shows a skateboarder in mid-air performing a vert trick. The skateboarder is spinning in the air and flipping the board around. This image was likely taken at a skatepark or other vert skating location. 
 
      Socratic Model:   A skateboarder does a trick on a half-pipe. 
 
      BLIP:   A man flying through the air while riding a skateboard 
 
      BEST with only tags:   This image is of Malto vert skating at a Crailtap skatepark. Daewon is also in the shot, watching Malto skate. This image was taken for the Berrics website. 
 
 

 
 
   
 
   
      Human Annotation:   The building tall and has many different shaped windows. There is picture depicted on side of the building. It has a ban in a black garment and black hair. Next to the man there word in yellow and white. This is a down town street. On one side there are the building and on the other side there is a train  track with a red and white train that is stopped. Next to the building with the picture there is tan shorter building with column separating its window and a outside clock across the street from it.   
      BEST:   This image captures the capital center in Salt Lake City. The citycenter is prominently featured in the foreground, with the Mutual of Omaha building and the Kansas City Power and Light building visible in the background. The light rail system is also visible in the left of the image. 
 
      Socratic Model:   The photo shows a busy city district with a tall clock tower in the center. 
 
      BLIP:   A city street with a clock in the middle of it 
 
      BEST with only tags:   This image is of the Capital Center, Citycenter, and the County Building in Salt Lake City. The Mutual of Omaha building can also be seen in the background. The Kansas City Power and Light building is also in the image. 
 
 

 
 
   
 
   
      Human Annotation:   A vintage ad for Gold Seal floors and walls shows a woman in a red and black party dress entering a bedroom. There is a platform, and a bed on the platform with a ottoman, and a nightstand. A tall window behind the bed has closed curtains. A bookcase on the wall has white books on the shelves. The floors appear to be terrazzo. 
      BEST:   This advertisement for a bed room features a woman in a red dress. The room has a coldspot refrigerator, masonite door, therma tru, and armstrong linoleum. 
 
      Socratic Model:   A cozy sketch of a bedroom, with a dressing gown and carpet pad. 
 
      BLIP:   An advertisement for a bed room with a woman in a red dress 
 
      BEST with only tags:   This image is a advertisement for Armstrong Linoleum, Coldspot Refrigerators, Masonite Doors, and Therma Tru. The ad features a woman in a 1950s-style dress walking through her home, which is decorated with these products. The woman looks happy and content, and the products all seem to be high quality and well-made. This image creates the impression that using these products will make your home look and feel great. 
 
 

 
 
   
 
   
      Human Annotation:   A baby elephant standing next to a larger elephant. The small elephant is standing in the dirt next to a stick. There is a log fence behind the elephants.  
      BEST:   This image is of a baby elephant. Its legs can be seen to the right of the image, and it is standing in the middle of the image. To the left of the image is an adult elephant. 
 
      Socratic Model:   A pachyderm in its youth. 
 
      BLIP:   A baby elephant standing next to an adult elephant 
 
      BEST with only tags:   This image features a baby elephant. The elephant calf is resting its trunk on the ground, and its legs are bent beneath it. The calf's skin is a light brown color, and its eyes are closed. 
 
 

 
 
   
 
   
      Human Annotation:   There is a white boat in the water. There are small waves in the water surrounding the boat. There is two people standing inside of the boat. There is a man standing outside the boat wearing an orange vest and holding an orange life vest. The man has a blue hat on his head. There is a person on the boat wearing a gray sweatshirt. 
      BEST:   This image is of a group of people wearing different types of Coast Guard gear. The person in the center of the image is wearing a life jacket, and the person on the boat is wearing a wet suit. There are also several life vests and two life preservers visible in the image. 
 
      Socratic Model:   This image shows a lifeboat or other rescue vessel. 
 
      BLIP:   A man in an orange life jacket on a boat 
 
      BEST with only tags:   This image features the United States Coast Guard Auxiliary, which is a volunteer reserve branch of the Coast Guard. The Auxiliary assists the Coast Guard in performing its missions, including search and rescue, maritime law enforcement, and aids to navigation. The Auxiliary also performs other tasks such as conducting safety patrols and providing boating education. 
 
 

 
 
   
 
   
      Human Annotation:   A pasture that has green and brown mix grass and a large amount of little green bushes and a lot of tall trees.  There is a group of gray elephant walking through the pasture, some of the elephants are large and some are small. The elephants are walking behind a bush In the background there is a house with a blue sky behind it. 
      BEST:   This image shows a herd of elephants walking across a lush green field. The elephants are a mix of different colors, including black, gray, and tan. They are walking next to a tree and a warthog can be seen in the lower left corner of the image. 
 
      Socratic Model:   A herd of elephants making their way to a watering hole to drink and socialize. 
 
      BLIP:   A herd of elephants walking across a lush green field 
 
      BEST with only tags:   This image is of a herd of elephants in a national park in Tanzania. The elephants are all in the same area, and appear to be grazing on the grass. 
 
 

 
 
   
 
   
      Human Annotation:   A modern white bathroom in a hotel room is lit with a few lights. There is a white modern toilet in a glass enclosure and a white round sink that looks like a tube. A brown piece of luggage sits on the wood floor near the door with it's handle raised. A piece of paper is on the back of the door, and there is sign hanging from the handle.  
      BEST:   This image features a white toilet and sink in a bathroom. The toilet is glossy and has a flush handle, while the sink has chrome handles. There is also a shower in the room, with glass doors. The luggage is small and brown, and sits at the left side of the image. 
 
      Socratic Model:   A hotel room or utility room with a sink and toilet. 
 
      BLIP:   A white toilet sitting next to a white sink 
 
      BEST with only tags:   This image shows a bathroom with a Duravit toilet and Laufen washpod. The toilet is white and the washpod is stainless steel. The bathroom has a tiled floor and white walls. 
 
 

 
 
   
 
   
      Human Annotation:   a cat is inside of a mug. the cat is white in color. the cat has painted brown ears. the nose of the cat is brown as well. 
      BEST:   This image features a white cat sitting in a coffee mug on a table. The mug is blue and has a white corgi on it. The cat is white and appears to be made of ceramic. It is sitting upright and has its tail wrapped around its body. The table is black and the background is light blue. 
 
      Socratic Model:   A desk with a cat perched atop it, and a mug of coffee. 
 
      BLIP:   A cat sitting in a coffee cup on a table 
 
      BEST with only tags:   This image is of a promotional mug from the company Enesco. The mug is white and has a black image of a cat on it. The cat is sitting up and has its tail curled around its body. It has a smile on its face and appears to be looking at the viewer. 
 
 

 
 
   
 
   
      Human Annotation:   the keyboard is very old fashioned. the buttons stick up straight. the color of the typewriter is dark black. the letters are labeled in white. it's sitting on a wooden table. 
      BEST:   This image is of a German Enigma machine on display in a glass case. The machine has a qwerty keyboard and is large in the image. 
 
      Socratic Model:   A game equipment keyboard to decode and portable computer to type on in an archive. 
 
      BLIP:   An old typewriter is on display in a glass case 
 
      BEST with only tags:   This image features an enigma machine, a codebreaking device used by the Germans during World War II. The enigma was used to send encrypted messages, which the Germans believed were unbreakable. However, the British were able to crack the code, thanks to the work of mathematician Alan Turing and his team of codebreakers. 
 
 

 
 
   
 
   
      Human Annotation:   A man is jumping over a white and orange traffic cone with his skateboard. His arms are extended, his left leg is higher than the right, and his skateboard is in the midst of a flip. He is wearing a white t-shirt and blue jeans.Two other men are standing near a fence watching. The man on the left is also wearing a white t-shirt and jeans. The man on the right is wearing a brown shirt and khaki pants and holding a skateboard. His left arm is on his hip. Bare trees are in the area behind the fence.   
      BEST:   This image features a man riding a skateboard over a traffic cone. The skateboarder is performing a wallie, which is a skateboarding trick. The skateboard is at the lower middle of the image and is moderate-sized. The man is in midair and is performing the trick. 
 
      Socratic Model:   A skateboarder ollies over a gap in a downtown skatepark. 
 
      BLIP:   A man riding a skateboard over a traffic cone 
 
      BEST with only tags:   This image is of a skateboarder in mid-air, performing a wallie. A wallie is a skateboarding trick where the skateboarder "jumps" off of a wall and then back onto the board. The skateboarder in this image is performing a frontside wallie, which is a variation of the wallie that involves flipping the board around so that it faces the other way. This particular trick is very difficult to master, and takes a lot of practice. 
 
 

 
 
   
 
   
      Human Annotation:   The bathroom is old and empty. There are three white sinks. The cubicle doors are made of metal. The room is navy blue with white tiles. 
      BEST:   This image shows army showers, buckstaff bath house, lavatories, and trenton bath house. Each of these locations has a sink, and the sink in the image is small. The sink is at the lower left of the image and has metalic edges. It is possible that this sink is in a bathroom, as it is white. 
 
      Socratic Model:   Bathroom of the dead. 
 
      BLIP:   A row of sinks in a public restroom 
 
      BEST with only tags:   This image is of four different army showers, as well as the buckstaff bath house and lavatories. There is also a view of the trenton bath house and its bathroom. 
 
 

 
 
   
 
   
      Human Annotation:   A man holding a baseball bat is wearing a black shirt and white pants. There is a man crouching down behind him wearing a baseball mitt. Behind that is a man in a black shirt. There are several people sitting behind the field watching the game.  
      BEST:   This image is of a baseball player batting. The hitter is leaning into the swing and the ball can be seen just beyond the batter. The catcher is in position to catch the ball and the umpire is visible in the background. The image is blurry, likely due to the motion of the players. 
 
      Socratic Model:   The hitter strikes out as the crowd goes wild. 
 
      BLIP:   A baseball player holding a bat on top of a field 
 
      BEST with only tags:   This image captures a batter about to hit a home run. The audience is visible in the background, and the ball is just about to leave the bat. This would be an exciting image for any baseball fan to see. 
 
 

 
 
   
 
   
      Human Annotation:   A zebra is sniffing the ground. The zebra has black nose. The stripes of the zebra's fur are black, white and brown. Behind the zebra are rocks piled up. 
      BEST:   This image features a zebra standing in a dirt enclosure in a zoo. The zebra is a common zebra, and is larger than most zebras. The zebra is grazing on the grass in the enclosure, and there are trees and bushes in the background. 
 
      Socratic Model:   A zebra at a watering hole. 
 
      BLIP:   A zebra is grazing in a zoo enclosure 
 
      BEST with only tags:   This is an image of a zebra at a zoo. The zebra is black and white, and has a long, striped tail. It is standing next to a small fence, looking out at the viewer. 
 
 

 
 
   
 
   
      Human Annotation:   The man standing is looking down. There is someone squatting down next to a motorcycle. The man standing has gray hair. The man is standing by a parked car. The car is white. The mirror on the car is black. There are a bunch of trees in the background. The motorcycle has a big beige bag on yhe back of it. 
      BEST:   This image features two men working on a motorcycle in a parking lot. The man on the left is wearing knee pads, and the man on the right is squatting down next to the motorcycle. The motorcycle is covered by a bag, and the spectators are in jeans. 
 
      Socratic Model:   A person repairs their motorcycle at a local picnic area. 
 
      BLIP:   Two men working on a motorcycle in a parking lot 
 
      BEST with only tags:   This image is of a man loading a motorcycle into the back of a truck. He is using a hitch to secure it in place. The motorcycle is fitted with luggage, which looks to be quite spacious. There is a tripcheck oregon sign in the background, possibly indicating that this image was taken in Oregon. 
 
 

 
 
   
 
   
      Human Annotation:   There are three giraffes in a pen. The pen is surrounded by a rope fence. The giraffe in front is eating food out of a net hanging from the tree.  
      BEST:   In this image, there are two giraffes standing next to each other in a fenced in area. The giraffe on the left is slightly smaller than the other giraffe. Both giraffes are leaning or bowing down to eat leaves from a tree. 
 
      Socratic Model:   The Giraffe and the Vicuna at the Zoo 
 
      BLIP:   A couple of giraffe standing next to each other 
 
      BEST with only tags:   This image features two reticulated giraffes. The taller of the two is standing next to a giraffe omnibed, which is a type of animal enclosure that allows visitors to walk among the animals. The taller giraffe is looking down at the people walking around, while the other giraffe is grazing on some nearby plants. 
 
 

 
 
   
 
   
      Human Annotation:   A metal street meter with the road behind it. There is a white car parked on the road and many cars behind a fence in the background.  
      BEST:   This is a black and white photo of a parking meter. The parking meter is sitting on the side of a road. The image is fuzzy and blurry. 
 
      Socratic Model:   A black and white photo of a parking meter. 
 
      BLIP:   A parking meter sitting on the side of a road 
 
      BEST with only tags:   This image is of a parking meter. The meters are used to clock how long a car is parked in a spot. There are also parking tokens which can be used to pay for parking. The meter is in duple meter, meaning it has two beats per measure. 
 
 

 
 
   
 
   
      Human Annotation:   Image is in all black and white. A person is skiing on a mountain that is filled with tall pine trees that are scattered all throughout the image. The person is dressed from head to toe in ski gear and is wearing skis on their feet, and holding two ski poles. The sun is shining, but the skier is in the shade that is provided by the trees. The skiers face or gender can't be made out as their back is faced to the camera. 
      BEST:   This image is a black and white photo of a man riding skis down a snow covered slope. The man is skiing down a hill and appears to be having a lot of fun. He has big smile on his face and is skiing fast down the slope. There is also a blurred image in the lower middle part of the photo, but it is hard to tell what it is. 
 
      Socratic Model:   Gap in the ski slope 
 
      BLIP:   A man riding skis down a snow covered slope 
 
      BEST with only tags:   This image is of a skier on a black run in the ski resort of Whistler. The ski resort is located in the Coast Mountains of British Columbia, Canada and is one of the largest ski resorts in North America. The run is situated in the back bowls of the resort and offers stunning views of the surrounding mountains. 
 
 

 
 
   
 
   
      Human Annotation:   Young teenage girl is in her bedroom sitting on her bed.  She has black shoulder length hair is wearing a red shirt with a black and white design on it.  She is under her green, pink and red bed covers with her laptop on her lap.  On her left she has a window with no curtains and lots of light showing through.  There is a shelf on her left on the wall with lots of books on it.  There are a framed picture and a collage behind her on the wall.   
      BEST:   This image shows a woman sitting on a bed using a laptop computer. There is a blanket on the bed, or the bed may be messy, and the bed covering is at the lower middle of the image and is large. The woman is at the left of the image and is moderate-sized. She may be studying, as she has a college girl persona. The computer user is at the left of the image and is moderate-sized. 
 
      Socratic Model:   This image shows two people in a room, possibly a dorm room or bedroom. They are probably using a computer. 
 
      BLIP:   A woman sitting on a bed using a laptop computer 
 
      BEST with only tags:   This image is of a college student in their dorm room. They are surrounded by their bedding and other belongings. There is a desk in the corner with a computer on it, and a window with a view of the cityscape. 
 
 

 
 
   
 
   
      Human Annotation:   A man is sitting in a restaurant with others while eating pizza. The walls are painted a bright shade of green and a blue picture hangs behind the man. The man is in his late 40's or early 50's. He has silver hair with black eyebrows. He is wearing a short sleeved button up plaid shirt in white, blue and black plaid. On the table in front of him there is a pizza with one slice missing, on the pizza there is prosciutto and basil. An empty glass with a slice of lemon on its edge also sits on the table. 
      BEST:   This image is of Paul Hollywood, a British celebrity chef, eating a pizza. He is surrounded by other objects including a soup spoon, a glass of lemonade, and a plate of prosciutto. There is also a pizza slicer in the image. 
 
      Socratic Model:   A person enjoys a delicious pizza at a local pizzeria. 
 
      BLIP:   A man sitting at a table with a plate of pizza 
 
      BEST with only tags:   This image is of celebrity chef Paul Hollywood eating a pizza. Bourdain, the pizza guy, stands to the side and looks on. 
 
 

 
 
   
 
   
      Human Annotation:   Chopped tomato pieces sit on a cutting mat next to a silver chef's knife. There is a glass measuring cup in the background, and two bunches of green broccoli next to the tomatoes. The flash from the camera gives a bright light on the food, and the kitchen counter that everything is sitting on is a creamy white color.  
      BEST:   This image features a moderate-sized diced tomato on the left side, and a large wet broccoli on the right. The broccoli is chopped into small pieces, and the tomato is finely chopped. This image is perfect for recipes that include either broccoli or tomatoes. 
 
      Socratic Model:   A still life of broccoli and greens. 
 
      BLIP:   A cutting board with broccoli, tomatoes and a knife 
 
      BEST with only tags:   This image is of a head of broccoli with its florets removed. It shows the individual florets in different colors, some of which are still attached to the stem. The image also includes a salad with broccoli florets and other ingredients. 
 
 

 
 
   
 
   
      Human Annotation:   A boy is standing on a baseball field holding a bat in his hands. He is wearing a black helmet and a black and white uniform. A catcher is squatting behind the boy. He is wearing a black face mask and a brown baseball glove. The field is surrounded by a gray chain link fence. A silver vehicle is parked outside of the fence. 
      BEST:   This image is of a boy at bat in a little league game. The boy is leaning into his swing and the bat is level with his shoulder. The catcher is crouched down and has his glove ready. The umpire is watching the play. The pitcher's right leg is visible and the infielder is running to cover first base. 
 
      Socratic Model:   A young batter lines up to take a swing at a ball. 
 
      BLIP:   A baseball player holding a bat on top of a field 
 
      BEST with only tags:   This image features a young baseball batter in a batting stance. The focus is on the batter's hands as they grip the bat and prepare to hit the ball. In the background, there is a hint of the catcher's mitt and other players waiting in the field. This image captures the excitement of hitting a ball and playing America's favorite pastime. 
 
 

 
 
   
 
   
      Human Annotation:   This is a bathroom scene.  A large vanity spans the entire right side to the toilet.  The toilet is white with the lid lifted and the seat down.  Various cosmetics are on the small counter above the toilet.  Next to the toilet is a bathtub with glass doors enclosing it. 
      BEST:   This image is of a bathroom with a beige toilet seat. The toilet is in the lower right corner of the image and is moderate-sized. The shower/tub combo is in the upper left corner of the image and is large. There are marble walls and floors in the image. 
 
      Socratic Model:   A photo of a throne room with a sitz bath and hip bath. 
 
      BLIP:   A white toilet sitting next to a bath tub in a bathroom 
 
      BEST with only tags:   This image features a bathroom with a marble sink and countertop. There is a white tub and shower combo unit as well as a white toilet. The walls and floor are tiled in a pale beige marble tile. The overall effect is sleek and elegant. 
 
 

 
 
   
 
   
      Human Annotation:   Two men are standing outside on a dirt filled field. One of the men is wearing a black shirt and brown shorts. The other man is wearing a blue and gray shirt and dark bottoms. Both of the men have brown hats on their heads. A gray elephant is standing near the men. A colorful hula hoop is hanging around the elephant's trunk. 
      BEST:   This image features a man standing next to an elephant with a hula hoop. The elephant is bending down to play with the hula hoop, and the man is looking on with a smile. This image is from a Maesa elephant camp in Thailand, and it provides a fun glimpse into the playful side of these animals. 
 
      Socratic Model:   A gong tam-tam Lao Laotian elephant tusker female mammal handler hula-hoop acrobat at a zoo. 
 
      BLIP:   A man standing next to an elephant with a hula hoop 
 
      BEST with only tags:   This photograph captures a scene from the Maesa Elephant Camp, where guests can enjoy watching elephant polo games and demonstrations. The Elephant Nature Park is also located nearby, which offers visitors the opportunity to learn more about elephants and their habitat. And each year, the Mae Sa Elephant Festival takes place, featuring a variety of activities such as elephant trekking and shows. 
 
 

 
 
   
 
   
      Human Annotation:   A gold clock tower with a blue base is on the sidewalk. A man wearing a blue jacket and jeans is looking over his shoulder at it as he walks by. On the right side of the sidewalk, people are walking by the storefronts, including the Gap. A bus is stopped by the curb. A truck and a taxi are in the lane next to it. 
      BEST:   The image features a view of Union Square in San Francisco. The steam clock and the Corpus Clock are both visible in the image. The Zelman Clock is also visible in the image. 
 
      Socratic Model:   A department store clocktower with a four o'clock. 
 
      BLIP:   A clock on a pole on a city street 
 
      BEST with only tags:   This image shows the steam clock in Union Square and the Corpus Clock on the south side of Market Street in San Francisco. The Zelman Clock is also visible in the background. 
 
 

 
 
   
 
   
      Human Annotation:   The image is of a kitten in a bag. The bag appears to be sitting on top of a bed with a white bedding. The kitten has yellow eyes and white around its nose. Its head is black and gray. The rest of its body is squeezed into the bag. His tail is curled around and is black and gray striped. Beside its left eye is a thin, black stripe. The kitten is looking down. The bag the kitten is in is striped with blue, red, yellow stripes. There are smaller stripes of white, green, yellow, etc. The bag is partially opened so the kitten can stick its head out.  
      BEST:   In this image, a cat can be seen sitting inside of a bag on top of a couch. The bag is made from cloth and has a zipper running along the top. The cat seems to be comfortable inside the bag, with its tail sticking out one end. 
 
      Socratic Model:   A cat in a tabby bag, looking for a place to hide. 
 
      BLIP:   A cat sitting inside of a bag on top of a couch 
 
      BEST with only tags:   This image is of a napping kitty inside a soft, cozy sac. The kitty looks comfortable and relaxed, and the sac looks like the perfect place to take a nap. 
 
 

 
 
   
 
   
      Human Annotation:   There is a white horse looking towards the ocean. The horse has a long mane that is white. The horse ears are black on the inside. The ocean waves are crashing on the light brown sand. The sand is very wet. There is a small black rock in the middle of the sand. The sky above the ocean is a light blue color. There is a light white colored cloud in the sky. 
      BEST:   This image features a montelimar beach, horses on the beach, popoyo, pavones, guanacaste. At lower left of the image is a forelock, or horse's mane, or white mane. This mane is moderate-sized in the image. 
 
      Socratic Model:   A lone horseman rides along the coastline, sand and sea stretching out behind him. 
 
      BLIP:   A white horse walking along a beach next to the ocean 
 
      BEST with only tags:   This image features horses on the beach at Montelimar in Costa Rica. The horses are frolicking in the surf and sand, and the scene is a beautiful one. This image captures the natural beauty of Costa Rica perfectly. 
 
 

 
 
   
 
   
      Human Annotation:   Two children are posing for a camera in the snow.  The boy is standing on skis with a blue helmet and a snow jacket.  The girl has a graphic designed ski jacket and blue helmet.  There is a ski lift on the right side of the mountain.  Trees and mountains are seen in the distance. 
      BEST:   This image features a young girl and a young boy standing on top of a snow covered slope. Both children are wearing ski gear and appear to be ready to take a skiing or snowboarding lesson. The background of the image features the ski slopes of Mount Southington in New Hampshire. 
 
      Socratic Model:   At the ski resort, two people enjoy the chairlift ride and the snow-covered slopes. 
 
      BLIP:   A couple of kids standing on top of a snow covered slope 
 
      BEST with only tags:   This image is of Campgaw Mountain in New Jersey, Okemo Mountain in Vermont, and Mount Southington in Connecticut. All three mountains are ski resorts. In the foreground, there are people skiing and snowboarding. In the background, there are mountains and trees covered in snow. 
 
 

 
 
   
 
   
      Human Annotation:   There is a large strip of grass along a road, with buildings, people, buses, trees and flags. The grass is very green and has something more overgrown like bushes that run along the road. The strip of road that is showing to the right of the picture is black. There are two large buses on the road. One bus is red with yellow words on it and the other is black. There are people in both buses, and along the grass and road. There are large trees running by the roads and buildings in the middle and back of the picture. There are two buildings showing. One building is on a street corner and is white with many stories. The other is to the left and is grey with many stories. There are two flag poles and one of them has a flag hanging on it. 
      BEST:   This image captures several iconic London landmarks, including Hyde Park Corner, Russell Square, and Sloane Square. At the middle of the image, a man in a blue jacket can be seen walking next to a police van. In the background, a double-decker bus can be seen driving down London Boulevard. 
 
      Socratic Model:   A photo of a beautiful flower bed with a London plane tree in the background. 
 
      BLIP:   A double decker bus driving down a street 
 
      BEST with only tags:   This image features a view of Hyde Park Corner, Russell Square, Sloane Square, and Hyde Park in London. The area is bustling with people and traffic, and the skyline is visible in the background. 
 
 

 
 
   
 
   
      Human Annotation:   A giraffe stands in an outdoor enclosure. The giraffe is standing in a side view, with its head turned toward the camera. There is a metal fence behind it, with wooden posts. There are tall palm trees with brown trunks, and green leaves and branches. It is a clear sunny day, and blue sky is visible in the background above a tan building. The giraffe is standing on beige dirt or sand and its hooves are dusty.  
      BEST:   This image features a giraffe standing in a fenced in area. The adult giraffe is tall and has a brown coat. The animal is standing next to a tree, and there are plants visible in the background. 
 
      Socratic Model:   The Giraffa camelopardalis is the tallest living animal on land. 
 
      BLIP:   A giraffe standing in a fenced in area 
 
      BEST with only tags:   This image is of a tall giraffe. The giraffe is a giraffa, and the particular species is a Rothschild giraffe. The giraffe is looking towards the viewer with its large brown eyes. It has a long neck and legs, and its coat is a light tan color with dark brown spots. 
 
 

 
 
   
 
   
      Human Annotation:   Several people are walking in a park. A woman wearing a black leather jacket is holding a green leather purse. There is a woman sitting down beside a black fence drinking from a bottle. There is a woman wearing a black jacket and a red hoodie looking into her black backpack. There is a person wearing a blue jacket carrying a white plastic bag. 
      BEST:   This image features a woman walking down a city street. She is dressed in a mini dress and pink leggings, and is carrying a green bag. She is texting and seems to be engrossed in her phone, and doesn't seem to be paying attention to her surroundings. There are other people on the street, including a man in a blue jacket and a woman in a green outfit. 
 
      Socratic Model:   A group of people walking and talking on their cell phones. 
 
      BLIP:   A group of people walking down a sidewalk 
 
      BEST with only tags:   This image features a young woman standing on the sidewalk, texting on her phone. She is dressed in a stylish outfit, and seems to be in a hurry. She is surrounded by other pedestrians, who are all engaged in their own activities. This image captures the essence of city life, where people are always on the go and always connected to their phones. 
 
 

 
 
   
 
   
      Human Annotation:   A plate of food on the table. The plate is white and there is cords behind the plate on the table. The food has cheese and chopped onions on top of it.  
      BEST:   This image is of a blackened pizza. The pizza is on a plate and has blackened toppings. The toppings include grilled onions, barbeque chicken, and cheese. There is also a small amount of ketchup on the side of the pizza. 
 
      Socratic Model:   This photo was taken at a restaurant. There is one person. 
 
      BLIP:   A white plate topped with a pizza covered in cheese 
 
      BEST with only tags:   This image is of a pizza with toppings that include onions, barbeque chicken, cheese, and hamburger meat. There is also a dollop of salsa on top. 
 
 

 
 
   
 
   
      Human Annotation:   This is a picture of a street. The street looks to be at a bus station. There are many large buses parked. The buses are public transportation. The buses are painted white. There is black text on the bus. There are people walking by the station. There is a large walkway above the station. The walkway is metal with blue windows. 
      BEST:   This image is of a bus station with several buses parked in front of it. There are also people walking around, including a man in a red jacket who is jaywalking. 
 
      Socratic Model:   A photo of a transportation system or bus stop. 
 
      BLIP:   A group of buses parked in a parking lot 
 
      BEST with only tags:   This image shows a bus station with buses in the foreground and the Golden Gate Bridge in the background. The bus station has a sign that says "Lineas de Autobuses" and there are people waiting in line to get on the buses. There are also several people walking around the bus station. 
 
 

 
 
   
 
   
      Human Annotation:   This is a room that appears to be in a hotel. There is one lit lamp on the wall,hanging above a red footstool. There is another unlit lamp connected to a chain and hanging from the ceiling. The unlit lamp hangs above a painting of a forest scene, and a glass top table with two black chairs underneath. There is a small table to the left of the glass top table, and one that smaller table is a vase of black and gold. To the left of this, there is a large window, covered with red, orange, blue, and white curtains. The carpet is a black/brown color.  
      BEST:   This image shows a bedroom suite in a hotel. The suite has a round top table with a brown finish and four chairs around it. There is also a brown ottoman with legs and a brown dinning chair. Lastly, there is a large black case against the wall. 
 
      Socratic Model:   The serene and calming atmosphere of the room is perfect for a good night's rest. 
 
      BLIP:   A living room with a table and chairs 
 
      BEST with only tags:   This image is of a hotel room with a large bed and sitting area. There is a TV in the corner and a small table and chairs near the bed. The walls are decorated with paintings and there is a large window letting in natural light. 
 
 

 
 
   
 
   
      Human Annotation:   The bathroom is very nice and dimly-lit period the toilet lid is up. There is a round circular mirror above the toilet bowl. The fixtures in the shower are silver and made of metal. The toilet is a white color. The walls in the bathroom are marble. The marble is a gray white color. A cream color towel is hanging on the side of the shower door. 
      BEST:   This image is of a lighted shower with a round shower head. The shower has a marble surround and the toilet is in the background. The toilet is glossy, or toilet in th bathroo, or toilet seat raised is at lower left of the image and is moderate-sized in the image. 
 
      Socratic Model:   A room with a shower, a toilet, and a sink. 
 
      BLIP:   A bathroom with a toilet and a shower 
 
      BEST with only tags:   This image shows a bathroom with a round shower and lighted shower. There is also a marble bathroom with aqualisa showers. 
 
 

 
 
   
 
   
      Human Annotation:   A healthy breakfast sits on a dark gray table under a bright light. There is an orange on the left upper side next to a cup of tea and an apple near that. Below the apple there are three old brown bananas. A knife sits in between the apple and tea. There is a bowl of fiber cereal on a plate, and a silver spoon on the plate.  
      BEST:   This image is of a breakfast table with a plate of food and a bowl of fruit. The plate of food consists of cereal, shredded cheese, and brown sauce. The bowl of fruit contains a banana, an apple, and an orange. 
 
      Socratic Model:   A still life of a breakfast table. 
 
      BLIP:   A table topped with a plate of food and a bowl of fruit 
 
      BEST with only tags:   This image shows a breakfast table with a bowl of fruit, a carton of orange juice, and a glass of milk. There is also a carton of pediasure with fiber and a jar of honey. The fruit in the bowl includes oranges, apples, and bananas. 
 
 

 
 
   
 
   
      Human Annotation:   A pair of scissors with a black handle sit on a counter. There are many tags beside the scissors. There is a cloth beside the tags. There is a white cloth underneath the scissors. 
      BEST:   This image is about diabetic test strips, placebo meds, ibuprofen suspension, diabetic tussin, vicodin doses. The first object is a pair of scissors in the lower middle of the image. The scissors are moderate-sized in the image. The second object is a bottle of medication labeled "placebo meds." The third object is a tube of ibuprofen suspension. 
 
      Socratic Model:   One person works at a assembly line, landfill, or dressing room. 
 
      BLIP:   A pair of scissors sitting on top of a cutting board 
 
      BEST with only tags:   This is an image of a variety of diabetic test strips, placebo meds, ibuprofen suspension, diabetic tussin, and vicodin doses. The test strips are used to measure blood sugar levels, the placebo meds are used to mimic the effects of real medication, the ibuprofen suspension is a pain reliever, the diabetic tussin is a cough suppressant, and the vicodin doses are a painkiller. 
 
 

 
 
   
 
   
      Human Annotation:   there is a big gray building. the building has a clock on it. the clock is made of glass. the clock has big hands. 
      BEST:   This image shows the clock on the tower of Hallgrimskirkja, in Reykjavik City Hall. The clock has hands on its left clock face, and is small in the image. 
 
      Socratic Model:   The clock tower stands as a symbol of progress and time. 
 
      BLIP:   A clock tower with a sky background 
 
      BEST with only tags:   This image is of the Hallgrimskirkja church in Reykjavik, Iceland. The church is a popular tourist destination, and can be seen from many points in the city. The clock on the tower is a popular spot to take photographs, as is the view of the city from the top of the tower. The church was designed by Gu�j�n Sam�elsson and built between 1937 and 1945. 
 
 

 
 
   
 
   
      Human Annotation:   A baseball field with several players on it. There is stands surrounding the field with a lot of people sitting in the stands watching the game. One of the players is wearing a white uniform and a red hat.  
      BEST:   This image is of Roger Centre, the home of the Toronto Blue Jays. In the center of the image is the outfield, with right field in the foreground. The infield can be seen in the background, and a player from the opposing team (a Yankee) is visible at upper right. In the lower right corner is a small figure who is presumably a fielder for the Phillies. To the left of the image is an umpire, and just beyond him another player can be seen walking. 
 
      Socratic Model:   This image shows an empty baseball field, ready and waiting for a game to begin. 
 
      BLIP:   A group of baseball players standing on top of a field 
 
      BEST with only tags:   This image is of the Toronto Blue Jays playing at Rogers Centre. In the foreground is the infield, with the first baseman and pitcher in the shot. In the background is the outfield, with the right fielder in focus. The Rogers Centre is a large stadium, and this image captures its scale well. 
 
 

 
 
   
 
   
      Human Annotation:   There is a guy skateboarding. He is skateboarding on a black skateboard with white wheels. He is wearing a white shirt with gray shorts. He has on a pair of red sneakers with black markings and laces. He is in mid jump and has his hands over his heads. There are wooden benches behind the guy on the skateboard. The benches have purple handles. A building with bars and window is behind the benches and is showing the reflection of trees.  
      BEST:   The image shows a skateboarder flipping his skateboard at the Anthem skatepark in Freshpark. The man is wearing gray shorts and is squatting down to prepare for the flip. The skateboard is flipping high into the air and the man is in the middle of the trick. 
 
      Socratic Model:   Gap Skater. 
 
      BLIP:   A man riding a skateboard up the side of a ramp 
 
      BEST with only tags:   This image is of a skateboarder doing a wallie at the Anthem skatepark in San Diego. The skateboarder is wearing a black shirt and red shorts, and is shown in mid-air with his board tilted up. 
 
 

 
 
   
 
   
      Human Annotation:   There are a bunch of motorcycles sitting in front of a store. There is a large white sign on the store front. There is a large red sign on the store front. The sky above the store is blue. The road in front of the store is gray and paved. There are yellow lines on the road in front of the store. There are people standing around the motorcycles.  
      BEST:   This image features a group of motorcycles parked in front of a building. Many of the motorcycles are chrome, and there is a bear's motorcycle parked in the back. 
 
      Socratic Model:   A photo of an outdoor general store, repair shop, or restaurant patio. 
 
      BLIP:   A group of motorcycles parked in front of a building 
 
      BEST with only tags:   This image features a group of motorcycles parked outside a building during the Sturgis Motorcycle Rally. Many of the bikes are Harley-Davidson models, and the riders appear to be members of the Harley Owners Group. The De Soto Wisconsin restaurant is visible in the background. 
 
 

 
 
   
 
   
      Human Annotation:   There are two gray birds with red on the top of their heads. They are standing on a grass field. There is a lake behind the grass.  
      BEST:   This image shows two large birds standing on a lush green field. The birds are likely cranes, as they share many similarities in coloring and shape. The crane in the middle of the image is larger than the one on the right, and both are seen strutting across the grass. 
 
      Socratic Model:   An image of a bird in a park. 
 
      BLIP:   Two large birds standing on top of a lush green field 
 
      BEST with only tags:   This image features a sand crane, also known as a ringer crane. These cranes are known for their graceful dance-like movements, which is why they are often used in sculptures. The kangaroo crane is a related species that is slightly smaller and has a more upright posture. 
 
 

 
 
   
 
   
      Human Annotation:   The building has tiles on it. The tiles are two different shades of green. you can see many windows that are tinted. On the ground beside the building are several small green shrubs. You can see green grass, a parking sign, and a parking meter.  
      BEST:   This image shows a green square that is next to a wall cladding. The green blocks on the wall cladding are in a repetitive pattern. There is a parkdale high school sign in the upper left corner of the image, and a parkville high school sign in the lower right corner of the image. 
 
      Socratic Model:   A photo of a building facade. 
 
      BLIP:   A parking meter sitting in front of a building 
 
      BEST with only tags:   This image features the exterior of Parkdale High School in Green Square, Parkville High School with wall cladding made from green blocks. 
 
 

 
 
   
 
   
      Human Annotation:   A baseball player is holding a brown bat in his hands. He is wearing a blue and white uniform and a blue helmet. A white base is sitting on the ground in front of him. The field has green grass, brown dirt, and white painted lines on it. Three people can be seen sitting in a dug out watching the man play baseball. 
      BEST:   This image is of David Wright batting. He is in a solo hitter stance and is about to hit the ball. His bat is leaning against his shoulder and you can see the ball in the background. 
 
      Socratic Model:   A minor leaguer at a baseball stadium, taking a swing. 
 
      BLIP:   A baseball player swinging a bat at a ball 
 
      BEST with only tags:   This image is of Mets' player David Wright batting. He is a right-handed batter and is shown in his batting stance. His stance is very open, with his weight shifted more to his back foot. This allows him to get more power into his swings. His left arm is extended out in front of him, while his right arm is held close to his body. This allows him to swing the bat quickly through the strike zone. 
 
 

 
 
   
 
   
      Human Annotation:   A person is in fast motion skiing on the snow. The skis are multicolored. The trees in the background are a blur because the person is moving. The person is wearing a hat and gloves. The hat and gloves are both black. The trees in the background have snow on them. The person is wearing black pants. The hood on the person's jacket is bright red. 
      BEST:   This image is of a cross-country skier wearing a red jacket skiing on snow skis. The downhill skiier is located in the lower left corner of the image and is moderate-sized. 
 
      Socratic Model:   Skiing is a great way to enjoy the winter! 
 
      BLIP:   A man riding skis down a snow covered slope 
 
      BEST with only tags:   This image is of a skier skiing down a snowy hill. The skier looks to be having a lot of fun as they speed down the hill, and the surrounding landscape is beautiful and snowy. 
 
 

 
 
   
 
   
      Human Annotation:   Two white clock are on a tower. The clocks have black roman numerals and two hands. The steeple of the tower is color black, and on the corners has short poles. Smoke is coming above the tower. The smoke is expanding to a big building. Behind the tower, there are a big building with red columns. Behind the columns are doors with windows. 
      BEST:   This image shows a large clock tower in the background with a lit up building behind it. The clock has a face on each side, and the one on the right is slightly more visible than the one on the left. There is steam rising from the top of the tower. 
 
      Socratic Model:   Two people waiting at a train station. 
 
      BLIP:   A large clock tower with a lit up building in the background 
 
      BEST with only tags:   This image is of a steam clock in front of a clock company building. The clock tower in the background is lit up with a ghostly light. 
 
 

 
 
   
 
   
      Human Annotation:   A man and a woman are preparing their surfboards in a yard on a cloudy day. The man has his surfboard on a sleeve on the pavers of the patio. The woman is pulling her surfboard out of a plastic bag that is sitting on top of the surfboard sleeve. There is grass growing up in between the pavers. A tree, and tall grass is growing behind the man. The man is wearing red shorts, and the woman is wearing a blue shirt, and blue shorts.  
      BEST:   This image shows a man and a woman with surfboards on the ground. The woman is wearing a wet suit and the man is preparing to surf. The surfboards are soft and stretchy. 
 
      Socratic Model:   Three people at a assembly line, picnic area, or raft. 
 
      BLIP:   A man and a woman with surfboards on the ground 
 
      BEST with only tags:   This image shows a person learning to surf with a soft surfboard. The stretch surfboard is designed to be more forgiving and easier to learn on, making it a good choice for beginner surfers. The bag shown in the image can be used to protect the surfboard while it is being transported or stored. 
 
 

 
 
   
 
   
      Human Annotation:   A large double deck bus is driving on the street. There are people standing next to the bus. There is a large red building behind the bus.  
      BEST:   This image is of a double decker bus on a city street. The bus is white with purple stripes, and it is very large in the image. 
 
      Socratic Model:   A bus waiting at a station. 
 
      BLIP:   A double decker bus on a city street 
 
      BEST with only tags:   This image shows a Wrightbus FGHB2844LF citybus. The bus is white with a blue stripe running along the side, and the Transdev and National Express logos are displayed on the front and side. 
 
 

 
 
   
 
   
      Human Annotation:   A couple of teddy bears embrace each other. There are other teddy bears behind the two teddy bears. There is a large star to the right of the teddy bears. The floor under the teddy bears is white. There are many decorations behind the two teddy bears. There is a Christmas tree to the right of the teddy bears. There are lights handing from the walls behind the teddy bears. 
      BEST:   This image features two teddy bears standing next to each other. The yellow teddy bear is in the middle of the image and is moderate-sized. The stuffed animal on the right is a blurry image. 
 
      Socratic Model:   Two people at a gift shop looking at teddy bears. 
 
      BLIP:   A couple of teddy bears standing next to each other 
 
      BEST with only tags:   This image is of the Vermont Teddy Bear Company, which is a company that specializes in making antique bears. There is also a Steiff bear in the image, which is a well-known brand of teddy bears. Finally, there is a museum in the background that houses a large collection of teddy bears. 
 
 

 
 
   
 
   
      Human Annotation:   Five people are skiing high up on a mountaintop. Directly in front of the person wearing all blue are some trees. Following the person in blue is a girl wearing a white jacket and red snow pants. Two adults and a child are on the right. Looking down from the top of the mountain, one can see a village below, as well as many other snow-covered mountains in the distance. The sky appears overcast and cloudy.   
      BEST:   This image is of the Keystone ski resort in Colorado. The image shows a view of the ski resort from the back bowls, with the town of Vail in the background. The ski resort is full of skiers and snowboarders, with many wearing brightly colored clothing. There is a blue sky overhead, and the mountains are covered in snow. 
 
      Socratic Model:   A beautiful day on the slopes. 
 
      BLIP:   A group of people riding skis on top of a snow covered slope 
 
      BEST with only tags:   This image is of the Keystone ski resort in Colorado. The photograph was taken from the top of the Vail back bowls, looking down on Keystone. In the foreground, there are several skiers and snowboarders making their way down the mountain. In the background, there is a large expanse of snow-covered trees and mountains. 
 
 

 
 
   
 
   
      Human Annotation:   A street car is driving down a city street at night. Behind it another trolley is approaching. The lights from the vehicles, and the street lights light the road. There are people on the sidewalk on the left side of the street at the corner.  
      BEST:   This image is of a red and white trolley travelling down a street at night. The streetcar has its lights on and is in the middle of the image. 
 
      Socratic Model:   A photo of a busy street with a tramline. 
 
      BLIP:   A red and white trolley traveling down a street at night 
 
      BEST with only tags:   This image is of a Toronto streetcar. The streetcar is red, and it is travelling down Hamilton Street. 
 
 

 
 
   
 
   
      Human Annotation:   On the banquet table is an assortment of pastries. There is bread, croissants, and donuts. Each try has a tong for people to grab the pastries with, instead of using their hands. Under the table there is a assortment of white dishes for people to use. 
      BEST:   This image shows a variety of pastries that are available on a buffet. There are trays of crasant, brown cake, sliced toast on a plat, and baked goods. These items are likely to be popular among guests at a buffet. 
 
      Socratic Model:   This image shows a bountiful buffet of breakfast foods, perfect for starting the day off right! 
 
      BLIP:   A bunch of trays of pastries on a counter 
 
      BEST with only tags:   This image shows a variety of pastries that are being offered as buffet enhancements. There are crasant, baked goods, and other types of pastries. This image is providing inspiration for those who are looking to add some variety to their buffet offerings. 
 
 

 
 
   
 
   
      Human Annotation:   There is a boy in the foreground of the picture. He has his back to the camera. He is wearing a blue short-sleeved shirt, blue shorts, blue socks, and white sneakers. He is standing in a green grassy field. The day is sunny and the sky is bright blue. The boy is getting a kite up into the air. The kite is black, white, red, orange, yellow, green, blue, and purple. In the distance there is a fence separating the grassy area from a hill. Behind the hill is an orange spherical hot air balloon. The hot air balloon's basket cannot be seen. 
      BEST:   This image captures a young man in the process of throwing a bal at a kite flying in the sky. The orange balloon is also visible in the sky, as well as a bicycle in the grass below. The kite is a brightly colored parafoil kite, and the balloon is helium-filled. 
 
      Socratic Model:   A beautiful day to fly a kite! 
 
      BLIP:   A person flying a kite in a field 
 
      BEST with only tags:   This image features a parafoil kite flying in a great park next to a large balloon. The kite is brightly colored and appears to be a stunt kite, as it is performing tricks in the air. The balloon is also brightly colored and appears to be a Premier Kites product. 
 
 

 
 
   
 
   
      Human Annotation:   A train car parked at a train station. The train car has a yellow back end and blue, silver sides. There are many tracks near the parked train car. There is a covering over a passenger loading dock. There are buildings off in the distance. There are green trees to the right of the train. The train has many windows. There are two headlights on the train. 
      BEST:   This image is of a yellow train. The train is large in the image and is located in the center of the photograph. The train is a British Rail Class 207, also known as a Desiro. The train is used by First Great Western, Chiltern Railways, and South West Trains. 
 
      Socratic Model:   A photo of a train platform or interior, possibly with a rolling stock or diesel locomotive. 
 
      BLIP:   A yellow and blue train traveling down train tracks 
 
      BEST with only tags:   This image shows a Desiro train, produced by British Rail and now used by First Great Western, Chiltern Railways and South West Trains. The train is shown in its original British Rail livery, with the blue and white stripes on the side. 
 
 

 
 
   
 
   
      Human Annotation:   A round plate with food is sitting on a wooden surface. A square piece of flat bread is on the plate. On top of the bread is an orange sauce. A pile of greens are on top of the bread. A fork is sitting face down on the plate. Next to the plate is 2 pieces of sliced lemon. There are several seeds in the lemons pieces. There is a coffee cup of next to the plate and the lemons. The cup is filled with a brown beverage. 
      BEST:   This image shows a breakfast pizza with flatbread, over easy eggs, arugula, and lemon wedge. There is also a mug of coffee and a fork on the plate. 
 
      Socratic Model:   A delicious looking frittata being made in a kitchen. 
 
      BLIP:   A white plate topped with a slice of pizza next to a cup of coffee 
 
      BEST with only tags:   This image is of a breakfast pizza. A panizza is a type of flatbread pizza that is made in a skillet or frying pan. The dough for a panizza is usually thicker than for a traditional pizza, and it is often topped with eggs, bacon, and cheese. 
 
 

 
 
   
 
   
      Human Annotation:   a tennis racket is being held up. the logo is red in color. the rim of the racket is black in color. thee is a man in the background. 
      BEST:   This image shows a prokennex tennis racquet on a court tennis playing surface. The black trim on the racket is clearly visible, as is the man or player on the shorts. 
 
      Socratic Model:   Equipment for playing tennis outdoors 
 
      BLIP:   A man standing on a tennis court holding a racquet 
 
      BEST with only tags:   This image shows a man playing Court Tennis. He is using a ProKennex racket and seems to be enjoying himself. The court is surrounded by a tall fence, and there is a scoreboard in the background. 
 
 

 
 
   
 
   
      Human Annotation:   The bedroom is white. There is window in the far corner with white blinds that are closed. The sun is shining light at the top of the window blind. There is a cream colored recliner sitting next to  the window. The night stand next to the recliner has a small metal lamp with a white lamp shade on it. The bed has a red blanket covering it with matching red pillows. There is a tan dog laying on the bed sleeping on his side.  
      BEST:   In this image, a dog can be seen lying on a bed in a bedroom. The bed has a red blanket on it and the dog is lying on top of the blanket. The dog appears to be tired and is dozing off. There is also a window in the background of the image and a brown dog can be seen lying on top of a red blanket in the foreground. 
 
      Socratic Model:   A double bed in a clean and simple room. 
 
      BLIP:   A dog laying on a bed in a bedroom 
 
      BEST with only tags:   This image features a red bed with a bed redefiner and home comfort. The bed intruder is shown resting in the bed. 
 
 

 
 
   
 
   
      Human Annotation:   There are two white boxes laying on the grass. There are pizzas inside of the boxes. There are bottles in a box in front of the pizzas. 
      BEST:   This image features a couple of pizzas sitting on a lush green field. The pizzas are surrounded by greenery, and the box the pizzas are in is sitting on the grass. 
 
      Socratic Model:   A group of friends enjoying a delicious pizza lunch together in the park. 
 
      BLIP:   A couple of pizzas sitting on top of a lush green field 
 
      BEST with only tags:   This image features a group of friends enjoying a pizza party. They appear to be very passionate about pizza, as they are all enthusiastically eating and talking about it. The setting is a picnic area in a park, which provides a scenic and relaxful backdrop. 
 
 

 
 
   
 
   
      Human Annotation:   A women is eating food wearing a dark brown jacket. The women has long brown hair. Another women is standing next to her eating a slice of pizza. The women that is shorter has shorter brown hair. There is a women wearing a grey jacket behind the two women. The women eating the pizza is wearing a light brown jacket.  
      BEST:   This image features two women eating pizza in a store. The women seem to be enjoying their meal, and the pizza looks delicious. The store appears to be a Subway, and there are several other people in the background, including one person who is looking at the pizza. 
 
      Socratic Model:   The image shows two people at a fastfood restaurant or bakery. They look like they're enjoying a delicious snack or meal. 
 
      BLIP:   Two women are eating pizza in a store 
 
      BEST with only tags:   This image is of a group of people eating pizza and other food items from a Subway feast. There is a large variety of food on offer, including pukka pies, which seems to be a popular choice. The people in the image appear to be enjoying their meal, with some of them looking quite content. 
 
 

 
 
   
 
   
      Human Annotation:   There is a silver parking meter on the side of a street. There is a screen on the top of the parking meter. There are several trees on the sidewalk next to the street. There are several cars parked on the side of the street. The car in the front is silver. There is a brick building in the distance next to the street. 
      BEST:   This image shows a solar powered parking meter on a city street. The parking meter is made of silver metal and has a digital display. There is a charging station next to the parking meter and a sign that says "Solaire at the Plaza". 
 
      Socratic Model:   This image shows an outdoor parking facility. It looks like there might be a parking meter or solar panel in the photo. 
 
      BLIP:   A solar powered parking meter on a city street 
 
      BEST with only tags:   The image shows a parking meter with a solar panel on top. There is also a charging station for electric vehicles. The image is from the website solarsystemscope.com. 
 
 

 
 
   
 
   
      Human Annotation:   This picture is of a giraffe. The giraffe is eating some grass. The giraffe has it's mouth full. The giraffe is spotted brown and tan. The giraffes eye is closed. The eye is lined in black. There are brown and tan horns on the giraffe. There is a piece of wood in front of the giraffe. The wood piece is light brown. 
      BEST:   This image features two giraffes, one of which is feeding the other. The ears of the feeding giraffe are visible on its head, while the other giraffe has a long neck that extends into the background. Its tongue is also visible, as is its mouth, which is slightly open. 
 
      Socratic Model:   This image shows a watering hole where a giraffe and other animals drink and play. 
 
      BLIP:   Two giraffes eating hay from a wooden post 
 
      BEST with only tags:   This image features two reticulated giraffes. They are standing close to each other and appear to be kissing. The giraffe's tongues are out and it appears to be licking the other giraffe's face. This image is cute and romantic, and it highlights the affectionate nature of these animals. 
 
 

 
 
   
 
   
      Human Annotation:   A bunch of elephants are gathered together outside. Two of the elephants are very close to eachother and the other one is a couple steps away. Two of the elephants look like parents and the smallest one looks like a child. They are in an enclosed area that appears to be a zoo. There is a small body of water in the very front. 
      BEST:   There are three elephants in this image. One is a small baby elephant and the other two are larger adult elephants. The adult elephants are standing in the dirt next to a body of water. 
 
      Socratic Model:   A watering hole for elephants. 
 
      BLIP:   A group of elephants standing next to a body of water 
 
      BEST with only tags:   This image is of a group of elephants in a zoo in Berlin. There are three different types of elephants pictured - an Asian elephant, a Sumatran elephant, and a berlin zoo elephant. The elephants are all in a fenced-in area, and there are some trees and other plants in the background. 
 
 

 
 
   
 
   
      Human Annotation:   A galley kitchen is visible.  There are light oak colored cabinets and drawers with black countertops.  A white microwave sits on a counter in the back.  A white coffee pot is visible.  An opening is visible above the right hand counters.   A metal sink and faucets are under windows.  The flooring is marble style and is light beige in color. 
      BEST:   This image is of a galley kitchen. The cabinets are made of cherrybrook kitchen and have a qt kitchens style. The countertop is made of formica and the appliances are all stainless steel. There is a microwave oven, a stove, and a sink. The handrail is silver and the edge of the sink is beige. The floor is linoleum and the walls are white. 
 
      Socratic Model:   This photo shows a clean and empty kitchen. 
 
      BLIP:   A kitchen with white cabinets and blue counter tops 
 
      BEST with only tags:   This image is of a galley kitchen with cherrybrook kitchen cabinets and qt kitchens appliances. The style of the kitchen is modern with a clean look. 
 
 

 
 
   
 
   
      Human Annotation:    A dog is sitting in the hallway on  a wooden floor, balancing a glass of flowers between its eyes. The flowers are red tulips and they are in a glass half-filled with water. the wall on the right is painted a light green. It has a bookshelf with books stacked on it. The dog is brown with a white chest. 
      BEST:   This image features a dog with a vase of flowers on its head. The dog has a red nose and is likely a pitbull. Pitbull lovers, pitty, and apbt are all terms that could be used to describe this image. 
 
      Socratic Model:   A still life of a American Staffordshire terrier in a flower arrangement. 
 
      BLIP:   A dog with a vase of flowers on its head 
 
      BEST with only tags:   This image is of a red nose pitbull with a heart-shaped sticker that says "Pitbull Lovers" on it. The pitbull has a big smile on its face and is surrounded by colorful hearts. This image is meant to show the love and joy that pitbulls bring to their owners' lives. 
 
 

 
 
   
 
   
      Human Annotation:   Outside of the older style building is a in ground pool. It is empty and has no water in it. You can see the inside of the pool appears dirty. There is still a metal ladder attached to the side of the pool for people to climb in and out of it. There is also a a few chairs and a table with a umbrella for people to sit at. 
      BEST:   This image shows a swimming pool with a ladder and a chair next to it. The pool is in the foreground and the ladder is on the right side of the image. There is also a chair next to the pool and it is white. In the background, there is another swimming pool and there are some palm trees next to it. 
 
      Socratic Model:   A swimming pool in the middle of nowhere. 
 
      BLIP:   A pool with a ladder and a chair next to it 
 
      BEST with only tags:   This image shows a pool ladder with ivy growing up the side of the pool. There are also palm trees surrounding the pool. This image is from a neighborhood pool. 
 
 

 
 
   
 
   
      Human Annotation:   Two people are sitting next to each other at the table. On the table are drinks and many dishes of various foods. In the middle of the table is a cutting board with a whole pizza on it.  
      BEST:   This image captures a couple of people sitting at a table with plates of food. There is a large pizza in the center of the image, as well as smaller dishes of food. There is also a jug of liquid and a wineglass on the table. 
 
      Socratic Model:   This image shows a group of people dining at a pizzeria. 
 
      BLIP:   A couple of people sitting at a table with plates of food 
 
      BEST with only tags:   This image is of a pizza party. Multiple pizzas are shown, as well as people enjoying them. Pizzas from different restaurants are visible, including PizzaExpress and Pizza Hut. 
 
 

 
 
   
 
   
      Human Annotation:   A large black bear is standing on a field. There is grass and dirt behind the bear. The bear has brown eyes and brown fur around its mouth.  
      BEST:   This image is of a large black bear. The bear's nose is black, and its fur is a deep, dark brown. The bear is standing in the middle of the image, and it is clearly very large. 
 
      Socratic Model:   The mother bear and her cub at the tundra kennel. 
 
      BLIP:   A large black bear standing on top of a lush green field 
 
      BEST with only tags:   This image is of a black bear. Black bears are North American mammals that typically weigh between 100 and 400 pounds, making them the smallest species of bear. They are found in forested areas throughout North America, and their diet consists mostly of plants, insects, and small animals. 
 
 

 
 
   
 
   
      Human Annotation:   Two people can be seen crossing a road on a pedestrian crosswalk. They are pulling large suitcases that are in their hands. Cars can be seen sitting on the road. There is a parking lot across from the crosswalk. Tall light poles stand on the parking lot near vehicles. There are also trees that are seen on the lot.  
      BEST:   This image is of an airport. There are several small vehicles, including a pickup truck, a bus, and a taxi. The person is mostly in silhouette, and their legs are especially dark. There is also a large bag or suitcase that is dark brown. 
 
      Socratic Model:   A photo of an airport terminal or pedestrian crossing. 
 
      BLIP:   A woman with a suitcase waiting at an airport 
 
      BEST with only tags:   This image shows two airports, one in Dubai and one in Tel Aviv. They are both large, modern airports and they both look very busy. The Dubai airport seems to be especially crowded, with lots of people and planes visible. The Long Beach airport appears to be much smaller and less busy. 
 
 

 
 
   
 
   
      Human Annotation:   A man is running on a tennis court. He is wearing a green shirt, black shorts and a white headband. The man is holding a tennis racket in his hand, swinging it to a ball that is soaring in the air towards him. Two men are standing against the wall watching the game. A row of green plants and pink flowers are sitting in front of them. 
      BEST:   This image captures the men's singles semifinal match between Tommy Haas and Fernando Verdasco at the French Open. Verdasco can be seen serving to Haas, who is returning the ball. In the background, spectators can be seen watching the match. The ball is highlighted with a yellow dot, and the racquet is also visible. 
 
      Socratic Model:   A photo of a tennis player at a match. 
 
      BLIP:   A man swinging a tennis racquet on a tennis court 
 
      BEST with only tags:   This image is of four professional tennis players in action during the French Open. In the front row we see Tommy Haas and Fernando Verdasco, while in the back row we see David Ferrer and Milos Raonic. They are all intensely focused on the ball, with their racquets at the ready. The spectators in the background provide a splash of color to the image. 
 
 

 
 
   
 
   
      Human Annotation:   Two people are standing outdoors. They are at a vineyard. They are facing each other. They are holding wine glasses. They are crossing arms. they are drinking wine. The sun is shining on them. The man is wearing a backpack. The grapevines are behind the man. There are trees off to the side. There is a lot of grass on the groun. There are no clouds in the sky.  
      BEST:   This image is of a man and woman drinking wine together. The man has a backpack on and the woman is holding a cell phone up to her ear. They are both sipping on their wine glasses. 
 
      Socratic Model:   Three people enjoying a day of wine tasting at a vineyard. 
 
      BLIP:   A man and a woman are drinking wine together 
 
      BEST with only tags:   This image is of a white and red wine being poured into two glasses. The white wine is from New Zealand and the red wine is from the Rhine region of Germany. They are both summer wines, meant to be enjoyed outdoors on a hot day. They are both light and refreshing, with fruity flavors that pair well with food. 
 
 

 
 
   
 
   
      Human Annotation:   A piece of flat bread sits on a round white plate on a counter top. There is an orange on the counter next to the place and a grapefruit on a fast food soda top. There is a small dark red vase with small white flowers inside. Through the door way we see a living room with a white leather couch and ottoman. 
      BEST:   This image shows a plate of bread next to an orange. The bread is a flatbread, and the orange has a face on it. There is a silver spoon next to the orange, and a vase with flowers in it is on the counter. 
 
      Socratic Model:   A delicious breakfast with plenty of fresh fruit to start the day! 
 
      BLIP:   A plate with a piece of bread on it next to an orange 
 
      BEST with only tags:   This image is of a breakfast table with a bowl of fruit spread, some scandinavian crispbread, and a persian orange. The fruit spread is a deep red and has a tart flavor. The scandinavian crispbread is light and airy, and the orange is ripe and juicy. 
 
 

 
 
   
 
   
      Human Annotation:   A man is getting ready to serve a tennis ball. He has on a lime green shirt and black shorts. He has on lime green shoes. There are a bunch of people watching him. 
      BEST:   This image captures Roger Federer practicing his forehand at the ATP World Tour Finals. Federer is one of the most successful tennis players of all time, and is known for his powerful forehand shot. In this image, Federer is seen hitting a forehand shot while practicing. His racket is held high and he is looking towards the ball. His legs are bent and he is preparing to make contact with the ball. 
 
      Socratic Model:   A lone tennis player practicing their backhand in an empty room. 
 
      BLIP:   A man holding a tennis racquet on a tennis court 
 
      BEST with only tags:   This image shows Roger Federer practicing his forehand. He is at the ATP World Tour Finals, and he is using his usual racket. He appears to be concentrating hard on the ball, as he should be - this is one of his most formidable weapons. 
 
 

 
 
   
 
   
      Human Annotation:   There are three open laptops on the white table. A woman and a man with beard are sitting behind the laptops. The two laptops are black and the other one is gray. The laptops have black keyboards. The man with beard is holding a bottle of soda, while the woman is looking on something. On the further back are two white columns and beside these columns are black chairs and tables.  
      BEST:   This image shows two people sitting at a table with laptops. One laptop is green, and the other is black. They both have large screens, and the keyboards are visible. 
 
      Socratic Model:   This photo was taken at a computer room or indoor booth, with three people present. There may be a tablet-armed chair, personal computer, or other microcomputer in the frame. 
 
      BLIP:   A couple of people sitting at a table with laptops 
 
      BEST with only tags:   This image is of a group of children playing with Leapfrog computers. There are also several Netbooks in the image, as well as a laptop screen. Finally, there is an XO laptop in the foreground. 
 
 

 
 
   
 
   
      Human Annotation:   A wooden bench has a banana and a bird on it. The bird is blue and is standing on the edge. there are bushes next to the bench. 
      BEST:   A blue bird is sitting on top of a wooden table. It is eating a piece of fruit, which is likely a banana. There is a plantain nearby, as well as a yellow surfboard. 
 
      Socratic Model:   A photo of a beautiful outdoor setting, with a possible tanager, indigo bunting, or indigo finch. 
 
      BLIP:   A blue bird sitting on top of a wooden table 
 
      BEST with only tags:   This is a photograph of a blue gray tanager and a turquoise tanager. The blue gray tanager is a dark gray bird with a blue back, and the turquoise tanager is a light green bird with a turquoise back. Both of these birds are members of the tanager family, which are found in the Americas. 
 
 

 
 
   
 
   
      Human Annotation:   Three metal and wooden green chairs are side by side on the sidewalk in a park. The chairs have twisted metal sides and five wooden slats for the base. There is a walkway on the side of the last chair, and on the other side of the walkway there is another set of chairs. Behind and on the other side of the sidewalk there are trees. Behind the trees there is a beige building.  
      BEST:   This image features a green bench located in the center of the photograph. The bench is large and dominates the image. There are also several green chairs located in the upper-middle part of the photograph. These chairs are partially out of focus, but still visible. This image captures a summer day in Dublin, Ireland's St. Stephen's Green park. 
 
      Socratic Model:   A photo of a bench in a park. 
 
      BLIP:   A green park bench sitting in front of a building 
 
      BEST with only tags:   This image features a bench in a park with a green chair next to it. There is also a summer seat in the background. The bench and chair are both green, adding to the green surroundings of St. Stephens Green in Greenwich, England. 
 
 

 
 
   
 
   
      Human Annotation:   The table is brown in color. On it is one candle stick holder. Next to it is a dish holding fresh fruits. Underneath are leafs fallen from trees. In the back you can see two wooden chairs.  
      BEST:   This image is a painting of a cornucopia centerpiece. The cornucopia is a basket filled with fruit, and it is sitting on a table. There is a bowl of fruit in the middle of the image, and it is moderate-sized in the image. 
 
      Socratic Model:   A colorful and still life painting of a dining room table. 
 
      BLIP:   A painting of a cornucon and fruit on a table 
 
      BEST with only tags:   This image shows a cornucopia centerpiece, with a basket of corn, fruit, and other Thanksgiving staples. The painting is done in a realistic style, with attention to detail. The colors are warm and inviting, making the viewer feel welcome to the feast. 
 
 

 
 
   
 
   
      Human Annotation:   A little girls in a white dress and white stockings holding a yellow and white tennis racket stands on a green air grate in front of a white tarp. The wind from the grate blows her hair all around her face. She is smiling at the camera as she stands on the grate. 
      BEST:   This image features a young girl posing with her tennis racquet. She is dressed in tennis gear, and her racquet is yellow. The girl is in the lower middle of the image and is moderate-sized. 
 
      Socratic Model:   A professional tennis player hits the ball at a tennis camp. 
 
      BLIP:   A little girl holding a tennis racquet on a tennis court 
 
      BEST with only tags:   This is a young tennis player, presumably a junior, named Annika. She is posed with her Prince racket in hand and what looks to be a ProKennex tennis ball at her feet. Her kit is all white, adding to the crisp and clean look of the photo. 
 
 

 
 
   
 
   
      Human Annotation:   The broccoli on the plate is very green in color. The broccoli as well as some yellow beans are in a sauce. The sauce on the plate is very light in color. The plate is a big Square plate. 
      BEST:   This image is of a plate of steamed broccoli. The broccoli is a light green and is wet. There is a small sprite or caterpillar on the broccoli. There is also a small amount of garlic on the broccoli. 
 
      Socratic Model:   Delicious looking caper sauce over a veloute. 
 
      BLIP:   A white plate topped with broccoli and corn 
 
      BEST with only tags:   This is a photo of a plate of steamed broccoli. There is a healthy portion of broccoli on the plate, as well as some diced chicken and a touch of garlic. The broccoli is a vibrant green color and looks fresh and healthy. 
 
 

 
 
   
 
   
      Human Annotation:   A group of people have gather around the skateboarding ramp to watch other skateboarder's skate on it. There is one person in the ramp. It looks like that person fell down off of their board. 
      BEST:   This image features a skateboarder doing tricks at a skatepark. The skateboarder is in black pants and is wearing a green jacket. There is a blue hoodie on another spectator. The railing at the skatepark is chrome plated. 
 
      Socratic Model:   A skateboarder showing off their skills at an indoor skating rink. 
 
      BLIP:   A man riding a skateboard up the side of a ramp 
 
      BEST with only tags:   This image is of a group of skateboarders at the ollies skatepark. The skatepark has a number of different vert ramps and bowls, as well as a street course. The skaters are all enjoying the various obstacles, with some of them performing tricks while others are just messing around. 
 
 

 
 
   
 
   
      Human Annotation:   A baby is wearing a white shirt. The baby has long dark eyelashes. The baby has a piece of broccoli in it's hand. The broccoli is small and green. 
      BEST:   This image features a close-up of a baby holding a piece of broccoli in its hand. The broccoli is wet and the baby is eating it. 
 
      Socratic Model:   A young child enjoys a healthy snack of kale. 
 
      BLIP:   A baby holding a piece of broccoli in its hand 
 
      BEST with only tags:   This image features a baby girl who is being fed organic baby food. The baby is looking at the food with interest and seems to be enjoying it. The background is a light green color and the baby's clothes are also green. 
 
 

 
 
   
 
   
      Human Annotation:   There is a long bridge over the water. It has many concrete pillars holding it up. In the distance you can see many trees. On the river bank you can see grass growing. It is a sunny day because you can see the shadows of things. 
      BEST:   This image shows the high bridge in Wisconsin, which crosses the Kerr Dam on the Mississippi River. The bridge is also near Lac qui Parle State Park, and can be seen in the background of the image. 
 
      Socratic Model:   A trestle bridge spans a man-made lake, with a rider on a unicyclist on the lakefront. 
 
      BLIP:   A black and white photo of a bridge over a body of water 
 
      BEST with only tags:   This image is of the high bridge in Wisconsin, crossing over the Kerr Dam. The view is looking downstream, and the Lac Qui Parle State Park can be seen in the distance. The Mississippi River Bridge is also visible in the background. 
 
 

 
 
   
 
   
      Human Annotation:   This picture is taken outside on a rainy day. Two women are walking while holding umbrellas above their heads. One woman is wearing a short sleeve blue shirt. She is holding a black umbrella above her head and carrying a white plastic bag in her hand. The other woman is wearing a gray shirt. She is holding a purple umbrella above her head and carrying a polka dot purse on her shoulder. Two other people can be seen in the background, a man and woman, walking under a white umbrella. 
      BEST:   This image features several people selling items in the rain, as well as a woman on her cellphone. There is also a purple umbrella in the image. The image is blurry and the objects in the image are mostly small. 
 
      Socratic Model:   A sea of people gather under the rain, their umbrellas and tarpaulins a colorful splash against the gray day. 
 
      BLIP:   A group of people walking down a street holding umbrellas 
 
      BEST with only tags:   This image shows a woman under an umbrella in the rain. She is holding a double umbrella, which is a type of umbrella that has two panels that can be opened separately. This allows one person to stay dry under the umbrella while the other person is exposed to the rain. The woman in this image is likely using her double umbrella to stay dry while she walks through a market. 
 
 

 
 
   
 
   
      Human Annotation:   This is a black and white photograph of a very old biplane taking off from a flat field. There is some sort of crop growing in the field, but it is indiscernable. The plane itself says "America" on its side. There is a star emblem on its tail as well as underneath the visible wing. The plane is only about 20 feet off the ground.  
      BEST:   This image is an old black and white photograph of a monoplane flying in the sky. The airplane has a single wing and is flying high in the air. The airplane is likely American, as it has the word "American" written on it in large letters. This photograph is an interesting piece of history, and provides a glimpse into the first days of aviation. 
 
      Socratic Model:   A photo of an aircraft at an airfield. 
 
      BLIP:   An old photo of an airplane taking off 
 
      BEST with only tags:   This image is of a North American Aviation Monocoupe. The Monocoupe was a small, two-seater aircraft that was first manufactured in the 1920s. It was later replaced by the Bellanca Pacemaker, which was also a two-seater aircraft. 
 
 

 
 
   
 
   
      Human Annotation:   A brick building that is trim in white at the bottom and a black gate on the side.  A black bend with paper in it is sitting on the side of the building.  The bin is sitting on a brick sidewalk.  There is a machine sitting by the black gate with button to push on it and it is wrapped in plastic. 
      BEST:   This is a picture of a parking meter sitting on the side of a street. The meter has a bagster, or large bag, wrapped around it, and a cash dispenser is visible on the front of the machine. This is an eco-friendly parking meter, as it uses less paper than traditional meters. 
 
      Socratic Model:   A photo of an empty parking meter, pay-phone, pay-station, dispenser, cash machine, cash dispenser, automated teller machine, automatic teller machine, automated teller, automatic teller, ATM, forecourt, slot, one-armed bandit, facility, installation, 
 
      BLIP:   A parking meter sitting on the side of a street 
 
      BEST with only tags:   This image features a parking meter, cash machine, and bagster. The parking meter is used to pay for parking, the cash machine is used to withdraw or deposit cash, and the bagster is a waste disposal bag that can be used to collect trash. The eco atm is a cash machine that is environmentally friendly and uses recycled materials. 
 
 

 
 
   
 
   
      Human Annotation:   A man is running on a grassy field. He is wearing a baseball cap, a short sleeve black shirt and black and white shorts. The man is holding a white Frisbee in his hands. There are some more men in the background standing and running on the field. There is a large white wall at the back of the field near some of the people. A large green tree can be seen behind a black and white net on the field. 
      BEST:   In this image, a player is shown holding a frisbee. He may be playing frisbee, or reaching for the frisbee, or catching the frisbee. His teammates are nearby, either running or jogging next to him. There is also a jogger in the image who is passing by in the background. 
 
      Socratic Model:   Two people playing catch with a Frisbee at an outdoor athletic field. 
 
      BLIP:   A man running across a field holding a frisbee 
 
      BEST with only tags:   This image is of a person playing frisbee. They are doing a freestyle move where they are flipping the disc over their head. The disc is flying through the air and the background is a grassy field. 
 
 

 
 
   
 
   
      Human Annotation:   A large white bus is positioned near the stop sign on the corner.  No one is in it.  On the sidewalk near the bus are several colorful bicycles parked on the sidewalk.  A blue sign referring to bike rental is near the bikes closest to the street by the stop sign.  Several buildings are hovering in the background.  
      BEST:   There are two main objects in this image: a bus and a bicycle. The bus is a Muni bus, which is a bus that operates in San Francisco. The bicycle is an orange and white bike, and it is parked next to the bus. There is also a stop sign in the image, and it is sitting on the side of the road. 
 
      Socratic Model:   This image shows a bus stop, which is a place where people can wait for a bus. 
 
      BLIP:   A bus and a bicycle are parked on the side of the street 
 
      BEST with only tags:   This image shows a bus stop with a Muni bus and an AC Transit bus parked in front of it. There are several people waiting at the stop, and both buses have their signs lit up. 
 
 

 
 
   
 
   
      Human Annotation:   This is an image of a city street. There is a truck parked by the curb. The curb is light gray. The truck is an old army truck. The truck is dark green. The truck tire is rubber and black. There is a many standing by the open truck door. The man has long brown hair. The man has a white tee shirt on. 
      BEST:   This image shows a military truck driving down a street. The truck is olive drab and is driving on a curb. There is a man standing on the curb next to the truck and he is wearing shorts. 
 
      Socratic Model:   An empty military vehicle parked outside a diner. 
 
      BLIP:   A military truck parked on the side of the road 
 
      BEST with only tags:   This image shows a Dodge M37 military truck. The truck is painted green and has a white star on the hood. It also has large black tires. The truck is parked in front of a building, and there are several people walking around it. 
 
 

 
 
   
 
   
      Human Annotation:   A woman is bent over on the tennis court. She is dressed in white. She has a tennis racket in her hands. The tennis court is green with white lines on it.  
      BEST:   This image features a female tennis player, Heather Watson, competing in the Wimbledon tennis tournament. In the background, spectators can be seen watching the match. The player is shown in mid-swing as she prepares to hit the ball. Her opponent is out of the frame. The tennis court is visible in the background, and a chair and other equipment can be seen on the court. The scoreboard is also visible in the background. 
 
      Socratic Model:   A photo of a tennis player about to serve. 
 
      BLIP:   A woman in a white dress playing a game of tennis 
 
      BEST with only tags:   This image features Li Na, one of the most successful female tennis players in the world. She is shown competing in the Wimbledon tournament, one of the most prestigious and well-known tournaments in the sport. The other woman featured in this photo is Kulichkova, who is also a competitor in this event. 
 
 

 
 
   
 
   
      Human Annotation:   The image is of a scenery in a downtown area of a city. There is a steeple that appears to be part of the red building on the left side of the street. There are two traffic lights and both are colored red. There is a white street sign on the traffic pole on the right and beneath it is a crossing signal with the symbol of a hand lit up. There are three cars on the left side of the street: a gray vehicle, a black vehicle and another gray vehicle. Down the street in the distance is a city bus and other vehicles on the right side of the street. There is a green steeple in the distance behind a group of green, tall trees. Trees align both sides of the street. 
      BEST:   This image shows a red traffic light hanging over a city street. The traffic light is blinking, and there are cars and other objects in the background. This image is from Stratford, Ontario. 
 
      Socratic Model:   A busy urban area with a stoplight in the center. 
 
      BLIP:   A red traffic light hanging over a city street 
 
      BEST with only tags:   This image is of the Stratford neighbourhood in Anoka County, Camrose and the neighbourhoods of St Paul. It shows the different types of homes in these areas and the various landscapes. 
 
 

 
 
   
 
   
      Human Annotation:   In the image only the head, neck, and a partial hoof of a Zebra is visible. The Zebra is white and black, and is leaning down to eat from the grass. The Zebra is striped. The grass that the Zebra is eating from is green with various twigs and clumps of dirt scattered across it. The picture was taken while the sun was shining.  
      BEST:   This image captures a zebra grazing in a field. The zebra's nose can be seen as it looks down at the grass, and its striped mane is visible against the green background. 
 
      Socratic Model:   A zebra stands in a pasture, grazing on the grass. 
 
      BLIP:   A zebra is eating grass in a field 
 
      BEST with only tags:   This image is of a Grants Zebra, which is also known as a Burchells Zebra. The Grants Zebra has a black and white striped coat, and its stripes are narrower than those of other zebras. This zebra is grazing in a field, and it has a zebraface looking out from behind it. 
 
 

 
 
   
 
   
      Human Annotation:   A very lone train is parked at a station. The train is lime green, white and black. The front has a window, and the train cars also have doors and windows. Next to the train is an empty track and an empty platform. Above the sky is grey and cloudy. 
      BEST:   This image is of a green train travelling south-east through the Dublin Dart station. The train is a Desiro, and is operated by Eireann (Irish Rail). South West Trains are also visible in the image, as is the First Great Western logo. 
 
      Socratic Model:   This is a photo of a train platform. 
 
      BLIP:   A green and yellow train traveling down train tracks 
 
      BEST with only tags:   This image is of a Dublin Dart train travelling south-west through the suburbs of Dublin. The train is a Desiro unit, and is operated by Irish Rail (Eireann) on the First Great Western service from Dublin to Cork. 
 
 

 
 
   
 
   
      Human Annotation:   A man leans over a table. The man is holding a hamburger. The man is attempting to eat the hamburger. The man is wearing a hat.  The man's arm is covered in tattoos. There are water bottles on the table. There are other people watching the man eat. There is a woman holding a cell phone. There is a sign behind the woman.  
      BEST:   This image is of a man eating a burger in a competitive eating contest. He is bending down to eat the burger, and his face is full of food. There is a water bottle and a soda bottle in the background, and the table is covered with food. 
 
      Socratic Model:   Taste-testing the competition. 
 
      BLIP:   A man is eating a hot dog at a table 
 
      BEST with only tags:   This image is of a man eating a burger. He seems to be in a hurry, as if he is competing in a burger eating contest. He has a determined look on his face and is taking big bites of the burger. 
 
 

 
 
   
 
   
      Human Annotation:   Grey and white birds are flying in the air. The sky is blue and have some white clouds. On the background there is brown hills covered with white snow. The bird on the foreground has the wings extended and flies to the right. The bird has a long black beck. The ground is wet and muddy and is covered with stones.  
      BEST:   This image features a flock of seagulls flying over the Moray Firth in Scotland. The gulls are shown in flight against a blue sky, with the ocean visible in the background. The wind turbines at the lower middle of the image are also visible, appearing as small specks against the horizon. 
 
      Socratic Model:   The Gulls of Winter. 
 
      BLIP:   A flock of birds flying over a beach 
 
      BEST with only tags:   This image is of a flock of seagulls flying over the Moray Firth. The gulls are silhouetted against the sky, and the sea is visible in the background. The image is peaceful and calming, and the seagulls are a beautiful sight against the bright blue sky. 
 
 

 
 
   
 
   
      Human Annotation:   A bed with a colorful quilt on it. The headboard on the bed is wooden. Next to the bed is a small table with a small lamp on it.  
      BEST:   This image features a bed with a colorful quilt on top of it. The quilt is a kaleidoscope design, with different colors and patterns making up the fabric. There is also a white quilt cover on the bed, adding to the colorful effect. 
 
      Socratic Model:   A person relaxing in a comfortable bed, surrounded by a beautiful patchwork quilt. 
 
      BLIP:   A bed with a colorful quilt on top of it 
 
      BEST with only tags:   This is a kaleidoscope quilt with a king-sized quilt and a twister comforter. It has bed quilts in different colors and fabrics. The quilt is accuquilt-made, which gives it a neater and more uniform look. 
 
 

 
 
   
 
   
      Human Annotation:   This photo is of two elephants in a forested area. There are lots of trees which have many green leaves. The ground also appears to have lots of green grass and vegetation. The elephants are gray. They have large ears and four legs. One of the elephants is facing the other. The tail of the elephant facing away is visible. The elephant in the center of the image appears to be missing a tusk. There is also a rock in the picture.  
      BEST:   This image features two elephants walking through a grassy field. The elephants have large tusks and are pictured against a backdrop of trees. This image is part of a series of photos taken at Disney's Animal Kingdom park, which is home to many different types of animals, including elephants. 
 
      Socratic Model:   A place where elephants go to drink and socialize. 
 
      BLIP:   A couple of elephants walking across a lush green field 
 
      BEST with only tags:   This image shows an elephant habitat in the Maharajah Jungle Trek section of Animal Kingdom. This area is home to a number of different animals, including Sumatran elephants. The elephants can be seen grazing in the open area, while a trainer watches nearby. 
 
 

 
 
   
 
   
      Human Annotation:   There are several people outside working and shopping at a booth that looks to be at a flea market. Separating the booths are big colorful sheets,in the front there is a man with a brown table with an arrangement of fruits in front of a brown door.Next to him there is a man standing on top of a brown shelf fixing his merchandise.In the back there are some more stuff but there items aren't as visible.In the middle are a large assortment of shoppers and a man walking a white horse. 
      BEST:   This image is of a souk, or bazaar, in the city of Meknes, in Morocco. The souk is a vibrant and colorful marketplace, where merchants sell their wares. In the center of the image is a mule, or burro, carrying a load of goods. At the left of the image are two men, one of whom is wearing a blue jacket. The man at right is wearing a jacket and carrying a bag. 
 
      Socratic Model:   A marketplace in Jordan. 
 
      BLIP:   A man walking down a street next to a horse 
 
      BEST with only tags:   This image shows a souk, or market, in the city of Meknes in Morocco. The souk is filled with stalls selling all kinds of goods, from food to textiles to souvenirs. There is a lively atmosphere, with people bargaining and chatting as they browse the stalls. 
 
 

 
 
   
 
   
      Human Annotation:   A white surface is shown with the body of five skateboards on it. There is a small red on in the front. The other four are lined up next to each other. The one on the left is white with trees on it, then a blue one with stick figures and a gray one with stick figures next to a black one with a design on it. 
      BEST:   This image is of four different types of skateboards. The red snowboard is at the upper middle of the image and is a moderate size. It has a bright red tray or dish on the bottom, which is possibly a serving platter. The black skateboard is at the upper right corner of the image and is also a moderate size. It has a black snowboard which is partially visible in the background. 
 
      Socratic Model:   A fingerboard, skateboard, or in-line skate on a landing deck or board. 
 
      BLIP:   A group of skateboards sitting on top of a table 
 
      BEST with only tags:   This image features several different skateboard brands. There are slave decks, alva skateboards, mcgill skateboards, and atm skateboards. The blind brand is also featured, which is a Canadian skateboard company. 
 
 

 
 
   
 
   
      Human Annotation:   The picture was taken in black and white. There are planes parked on the grass. There's a big plane and a small plane parked next to each other. The big plane has two propellers under the weight. The windows are on the side of the plane. The windows are circle-shaped. The grass is high. Some of the grass is brown colored. 
      BEST:   This image is a black and white photograph of a Nord Noratlas plane on the ground. The plane has two propellers on the front, and is painted in a white and brown color scheme. There is also a small Armstrong Whitworth plane parked in the background, as well as a De Havilland Heron and a Viscount. 
 
      Socratic Model:   A photo of an aircraft at an airport. 
 
      BLIP:   A black and white photo of a plane on the ground 
 
      BEST with only tags:   This image features a Nord Noratlas, an Armstrong Whitworth, a de Havilland Heron, and a Viscount. All four aircraft are in different stages of disrepair, with the Nord Noratlas appearing to be the most damaged. The Bristol Freighter is parked in the background. 
 
 

 
 
   
 
   
      Human Annotation:   This picture has been taken at a park. There are people at the park flying kites. There are two people mainly visible in the picture. The grass is very green and rich in color in the field. The sky is clear with a few clouds showing. On the right is a small almost bare tree. On the far left in the distance are buildings. 
      BEST:   This image features a man standing on top of a lush green field, holding a kite in the air. The kite is in the center of the frame and is small in comparison to the man. 
 
      Socratic Model:   A photo of a stunning kite flying high in an urban area. 
 
      BLIP:   A group of people standing on top of a lush green field 
 
      BEST with only tags:   This image shows a person flying a kite at a kite festival. The kite is decorated with bright colors and patterns, and it appears to be flying high in the sky. There are other kites flying in the background, and the surrounding landscape is lush and green. This image is peaceful and idyllic, and it captures the joy of flying a kite. 
 
 

 
 
   
 
   
      Human Annotation:   A man is surfing in the water. The surfboard is yellow. The man is shirtless and is wearing black shorts. He has dark hair. The man is on his hands and knees on the surfboard. There are moderate waves but behind the surfer the water is relatively calm. Large columns from a bridge are behind the surfer. 
      BEST:   This image features a man riding a wave on top of a surfboard. The man is in the lower middle of the image and is small in comparison to the wave. He appears to be body boarding or surfing on a river, as there is land in the background. The water looks choppy and there are white caps on the waves. 
 
      Socratic Model:   A surfer rides the waves at a river. 
 
      BLIP:   A man riding a wave on top of a surfboard 
 
      BEST with only tags:   This image is of a person surfing on a river. They are standing on a piece of wood, or a surfboard, and using the waves to move along the river. This is a sport known as wake surfing or wakesurfing. 
 
 

 
 
   
 
   
      Human Annotation:   This scene shows a living room with a makeshift computer desk. The computer screen has several windows open. There is a large chair, but there are no people in the image. The corner is lit by a tall lamp. There is a dining chair that is serving as a makeshift end table. It has a cordless phone, several water bottles, a mug, and several other items. The overall image is dark with the exception of the area lit by the lamp.  
      BEST:   This image is of a cluttered desk with a laptop and a pc monitor. There is also a brown mug and a red dish on the desk. In the background, there is a dark couch. 
 
      Socratic Model:   A photo of someone working at a home office or computer room. 
 
      BLIP:   A laptop computer sitting on top of a wooden desk 
 
      BEST with only tags:   This image is of a cluttered laptop desk. There are multiple items on the desk including a computer, a lamp, and a few papers. The desk is in a home setting and the view is from the side. 
 
 

 
 
   
 
   
      Human Annotation:   A fire hydrant is standing on the sidewalk. The hydrant has an orange base and red top. The hydrant is casting a shadow onto the sidewalk. The sidewalk is made of concrete squares. There is a manhole next to the hydrant that is dark gray and metal. On the road there is a white carriage with large wheels. 
      BEST:   This image shows a red fire hydrant sitting on the side of a road. The hydrant is red and is sitting next to a white horse drawn carriage. The carriage is pulled, or carriage parked, or carriage is on is at upper middle of the image and is moderate-sized in the image. 
 
      Socratic Model:   A fire hydrant stands at the ready. 
 
      BLIP:   A red fire hydrant sitting on the side of a road 
 
      BEST with only tags:   This image features a fire hydrant with a hose attached. The hydrant is made of brass and is in good condition. The hose is made of rubber and is also in good condition. This image is representative of the firefighters' ability to quickly get water to the scene of a fire. 
 
 

 
 
   
 
   
      Human Annotation:   A bus is in the street that is red and yellow. The bus has the words LOVE written on it in red letters. There are street lights that are visible. The cars are black beneath the bus. There is also a double decker bus to the left of the bus that is red. There are windows on both buses. There is a red building with letters on it in white. 
      BEST:   This image shows a city street at night filled with lots of traffic. There are cars, buses, and taxis all moving through the street. The Oxford Circus Christmas lights are visible in the upper left corner of the image and the Rock of Love bus can be seen in the lower right corner. 
 
      Socratic Model:   Public transportation in the city. 
 
      BLIP:   A city street filled with lots of traffic at night 
 
      BEST with only tags:   This image is of the Oxford Circus area in London. The Oxford Street Christmas lights are visible in the background, and a Routemaster bus is driving past. The Rock of Love bus can also be seen in the image. 
 
 

 
 
   
 
   
      Human Annotation:   A baseball player is swinging a bat that is in his hand. He is wearing a black helmet and a black and white uniform. A catcher is squatting behind him wearing a face mask and a gray uniform. The catcher has a brown glove on his hand. Two men can be seen standing behind a green fence that is in the dug out near the field. 
      BEST:   This image is a photograph of the Pittsburgh Pirates outfielder, Andrew McCutchen. In the photograph, McCutchen is seen hitting a ball and running towards first base. The ball appears to be a home run as it is well beyond the reach of the opposing team's outfielder. The photograph is taken from behind the hitter, and thus the viewer can see the entirety of the playing field. 
 
      Socratic Model:   A moment of silence for all the home runs that will never be hit. 
 
      BLIP:   A baseball player swinging a bat at a ball 
 
      BEST with only tags:   This image is of Pirates outfielder Andrew McCutchen. He is batting, and the ball is just about to be hit. In the background, you can see the catcher and second baseman getting ready to field the ball. 
 
 

 
 
   
 
   
      Human Annotation:   The bus is making a right turn at the corner. There are stripes on the side of the bus. The bus is mostly white. The windows are black. There is a silver car by the bus. There is a pole above the bus. There is a traffic light on the pole. There is a colorful sign by the bus. There are many trees by the side of the road. There are many cars on the road. The sky is bright and blue. 
      BEST:   This image features a white bus driving down a street next to a traffic light. The bus is decorated with the logos of foothill transit, sacramento regional transit, ac transit, and samtrans. There is also a silver car parked in the lot next to the bus. 
 
      Socratic Model:   This photo shows people crossing a busy street. 
 
      BLIP:   A white bus driving down a street next to a traffic light 
 
      BEST with only tags:   This image is of a bus stop in front of a foothill transit bus. There are several people waiting at the stop, and the foothill transit bus is stopped in front of them. The Sacramento Regional Transit bus is also stopped in the background. 
 
 

 
 
   
 
   
      Human Annotation:   Colorful boats with teal canopies are lined up on a murky river on a gray, overcast day. The boats have oars in front sitting in the water. Behind the boats small buildings can be seen lining the river. 
      BEST:   The large, colorful boat in this image is a prokat boat, which is a type of long tail boat. This boat is used for transportation in Thailand, and can be seen in the many floating markets throughout the country. The smaller boats in this image are skiff boats, which are also commonly used in Thailand for transportation. 
 
      Socratic Model:   A colorful array of boats available for purchase at an outdoor market. 
 
      BLIP:   A group of boats sitting on top of a river 
 
      BEST with only tags:   This image features a long tail boat floating in a river market. There are also several skiff boats in the water, as well as a long boat. The long tail boat is brightly colored and decorated, and appears to be a popular mode of transportation in the area. 
 
 

 
 
   
 
   
      Human Annotation:   The man lay in the bed and read the black book. He leans his head on the brown head board. The man is wearing a blue tee shirt. The little boy lay next to the man read the blue children's book. He is wearing a green tee shirt.  The man and boy are underneath the whit blanket.  There is a white curtain hanging behind the bed. 
      BEST:   In this image, a father and son are reading together in bed. The son is perched on the edge of the bed, while the father is reclining with his arms behind his head. They are both reading from a paperback book. The father has a newspaper propped up next to him, and the son has a wallet-sized photo tucked into the pages of his book. 
 
      Socratic Model:   This photo shows a reader and a teacher in a bedroom. 
 
      BLIP:   A man reading a book to a young boy in bed 
 
      BEST with only tags:   This image shows a father reading to his son at bedtime. The father is reading from a book called "Eggspress" while the son looks on with fascination. This image promotes the importance of reading to children and sharing stories together. 
 
 

 
 
   
 
   
      Human Annotation:   Two cows are in a field of grass and rocks.  One of the cows is black and white and the other cow is brown with white accents on its fur.  The field the cows are in has a lot of large and small rocks with patches of grass in between.  Beyond this grassy and rocky area is a body of curved water with boats on it.  Bordering the water are tall trees and other thick and varied foliage.  The sky is grey. 
      BEST:   This image captures a view of the Griswold cattle farm on Rhoad Island in Essex County, MA. The farm is well known for its Zebu-type cattle, which are bred for their meat and milk production. The dark colored cow in the center of the image is a representative of this breed, while the lighter colored cow at lower right is a typical Holstein-Friesian. 
 
      Socratic Model:   A group of people and cows grazing in a pasture. 
 
      BLIP:   A black and white photo of cows in a field 
 
      BEST with only tags:   This image features a scenic view of Rhoad Island in Essex County, MA. The image shows a pastoral landscape with rolling green hills and grazing cattle. In the distance, the blue waters of the Atlantic Ocean can be seen. The photograph was likely taken in Plymouth County, MA near the town of Chilmark. 
 
 

 
 
   
 
   
      Human Annotation:   A picture of a man holding a skateboard with his right hand. There are four wheels on the bottom of the skateboard. The skateboard is black on the top and bottom and white on it's sides. The man is wearing pants. There is a shadow being cast onto the ground. The young man is wearing white shoes. There is a little bit of grass sticking out of the ground near the man with the skateboard. 
      BEST:   In this image, a person can be seen holding a skateboard in their hand. The skateboard is a dark color and is positioned in the middle of the image. The person is wearing jeans and it appears as though they are about to skateboard. There is also a shadow of the skateboard that is positioned to the right of the person. 
 
      Socratic Model:   A chino skateboarder at a toyshop. 
 
      BLIP:   A person holding a skateboard on a sidewalk 
 
      BEST with only tags:   This image is a black and white photograph of a skateboarder. The skater is performing an ollie, and the board is in the air. 
 
 

 
 
   
 
   
      Human Annotation:   A picture in the day time of 4 zebras. There appears to be three full grown zebras and a baby zebra standing. There is dirt n the ground and a small rock with water on it for the zebras to drink. 
      BEST:   This image features a group of zebras in a zoo setting. The zebras are all adults, and the one on the right is slightly larger than the rest. The zebra on the left appears to be looking downward, while the one in the middle is standing in some mud. 
 
      Socratic Model:   At the watering hole, the zebra and bongo drink side by side. 
 
      BLIP:   A group of zebra standing next to each other on a dirt field 
 
      BEST with only tags:   This image shows a group of zebras in a zoo. They are standing around and looking at the viewer. There are also some birds in the background. 
 
 

 
 
   
 
   
      Human Annotation:   The man is snowboarding during the winter time. From the edge of a large cliff that leads to a range of mountains, he is trying to slide across the snow. His outfit consists of a bright green pants, that are long-sleeved, followed by a jacket with scribble patterns. His head is protected by a beanie.
 
      BEST:   This image captures a snowboarder in mid-air, mid-jump. The boarder is wearing a bright green jacket and is performing a difficult carving maneuver. In the background, there is a snowy mountain peak. 
 
      Socratic Model:   A snowboarder enjoying the powder at a ski resort. 
 
      BLIP:   A man riding a snowboard down the side of a snow covered slope 
 
      BEST with only tags:   This image features professional snowboarder Shaun White carving down a slope on a freeride board. He is wearing a Nike snowboarding jacket and pants, and has a cheerful expression on his face. The snow is freshly groomed, and the sun is shining brightly overhead. This image captures the excitement and thrill of snowboarding in perfect fashion. 
 
 

 
 
   
 
   
      Human Annotation:   A black and white spotted horse is standing in an enclosure.  It's head is facing a large rusty gate with old fliers partly still on it.  To the side of the horse is a large brick wall.  Attached to the wall is a small brown box that resembles a small wagon.  Two legs are attached to the front to help support it.  Next to the box is a small wooded building with a poster on the side in bright pink and yellow colors.  The bottom of the building is missing a couple of planks. Next to the horse is a small puddle on the ground reflecting the gate above it.  
      BEST:   This image features a black and white horse standing next to a building. The black hindquarter, or horse's side, or white markings is at the middle of the image and is moderate-sized in the image. This image may be from Bakra Mandi, Cow Mandi, Cow Qurbani, Chetak Horse, or Marwari Horse. 
 
      Socratic Model:   A pinto horse in a stable. 
 
      BLIP:   A black and white horse standing next to a building 
 
      BEST with only tags:   This image is of a bakra mandi, or cow market, in India. The marwari horse is a popular breed of horse in India, and the chetak horse is also a common sight. The cow qurbani, or sacrifice of a cow, is an important religious ritual in India. 
 
 

 
 
   
 
   
      Human Annotation:   The man is pouting. The is wearing a bow tie. The tie is green. He is wearing a stripes shirt. There is a text on the photo saying "BOW TIE FAIL." On his side is his desk. The desk has computer. There are also small pile of papers. And there is also old speaker. The window is visible. Outside, the trees are brown and bare. The ground is covered in snow. 
      BEST:   This image features a man wearing a green tie. The tie is a bright green color and stands out against the man's white shirt. The man's collar is up and his tie is at right of the image. He is a moderate size in the image. Attached to the tie is a small bowtie biter, or facebow. The bowtie biter is a small, brown piece of metal that attaches to the front of a necktie to keep it in place. 
 
      Socratic Model:   The modern workplace: Where even the ties are starting to look bored. 
 
      BLIP:   A man wearing a tie sitting in front of a computer 
 
      BEST with only tags:   This is a picture of a facebow, which is used in dental care to correct alignment of the teeth. The bowtique in the background may be selling these facebows, and the bowlow in the foreground may be a customer looking at them. The bo tie is also visible, which is a type of bow used to keep hair out of the face. 
 
 

 
 
   
 
   
      Human Annotation:   A white male in blue swimming trunks is on a small surf board. His left arm is stretched out to his side. He is wearing a white band on his wrist. The background is blue and contains text. The word "Flow" can be made out. The surfboard appears to be resting on a column of water, jetting up from below . 
      BEST:   In this image, a man is riding a surfboard on top of a wave. He is surrounded by a blurry background, and the edge of a sword, or long blades, or water skis is at lower middle of the image and is small in the image. This image is about flow rider, flowboarding, flowbarrel, wakesurfing, and water skater. 
 
      Socratic Model:   Aquaplane hydrofoil on a wave at a water park. 
 
      BLIP:   A man riding a wave on top of a surfboard 
 
      BEST with only tags:   This image is of a flow rider on a flowboard. They are riding what appears to be a flow barrel, which is similar to a wakesurfer. This gives the sensation of surfing on a wave. The water skater in the background looks like they are having just as much fun as the rider. 
 
 

 
 
   
 
   
      Human Annotation:   A man is wearing a black cap and jumping off of a skateboard. The skateboard is green and red. There is a red brick building behind the person. 
      BEST:   This image features a skateboarder doing a trick on a city street. The skateboarder is in the air, and the skateboard is flipping. The buildings and other objects in the background are blurry, due to the motion of the photograph. 
 
      Socratic Model:   A creative skateboarder weaves through pedestrians on their way to work. 
 
      BLIP:   A person jumping a skateboard in the air 
 
      BEST with only tags:   This image is of a skateboarder street surfing in a city street. The skateboarder is performing tricks and stunts on their board while moving down the street. There are cars and other pedestrians visible in the background, adding to the sense of excitement and danger. 
 
 

 
 
   
 
   
      Human Annotation:   A man is shaving in the bathroom. He is looking into a very big mirror. He has on a white tank and the door is open. 
      BEST:   This image depicts a man in the mirror, washing his beard and shaving. Various toiletries and objects are visible in the background, including a sink, a stand mixer, a hair drier, and a jar. The man is clean-shaven and is wearing a sleevless shirt. 
 
      Socratic Model:   A man shaves in front of a mirror. 
 
      BLIP:   A man standing in front of a bathroom mirror brushing his teeth 
 
      BEST with only tags:   In this image, a man is seen in the mirror, washing his beard. He is using a shaving mirror to get a closer look at his beard and to shave it. The man is using a Neutrogena Men razor and shaving cream to shave his beard. 
 
 

 
 
   
 
   
      Human Annotation:   A kitchen sink and dishwasher is shown. The tiles on the wall are white and have some red ones. There is fruit sitting on the table and the area is pretty tidy. 
      BEST:   This image shows a white kitchen with a red and white checkered backsplash. The kitchen has white cabinets and a metal sink with a red countertop. There is also a thermoplastic backsplash in the image. 
 
      Socratic Model:   A tiled surface with a dish rack and range hood in a kitchen or utility room. 
 
      BLIP:   A kitchen with white cabinets and a red and white checkered backsplash 
 
      BEST with only tags:   This image is of a red kitchen with thermoplastic backsplash. The countertops and backsplashes are a light beige color. There is a small kitchen with white cabinets and a black stove. There is also a black refrigerator. 
 
 

 
 
   
 
   
      Human Annotation:   A red plastic basket holds two hot dogs and a serving of potato chips on a white paper wrapper. the basket sits on a blue blanket on a car seat. The hot dog on the left has peppers, onions, and mustard on it, the one of the right has sauteed onions. On the floor near the seat is an army green bag which is open at the top. 
      BEST:   This image features two hot dogs on buns, with a side of chips. The Italian hoagie in the center of the image is a moderate size. The hot dog on the right has toppings, such as onions, on it. 
 
      Socratic Model:   The best way to enjoy a hot dog is with all the fixings! 
 
      BLIP:   Two hot dogs and chips in a basket 
 
      BEST with only tags:   This image features several different types of hot dogs, including truck dogs, hoagies, and cheesesteaks. The image is colorful and eye-catching, and it will likely appeal to fans of all types of hot dogs. 
 
 

 
 
   
 
   
      Human Annotation:   a plane is parked on the runway. the plane is white in color. there is white writing on the plane. the turbines are really big. the sky is very blue. 
      BEST:   This image is of a Turkish Airlines Boeing 737 airplane. It is white with red stripes running along the length of the plane. There is a large Royal Air Maroc logo in the center of the plane. To the right of the plane is an Air Arabia Boeing 737 and to the left is a Tronair Jet. 
 
      Socratic Model:   An airplane at an airport. 
 
      BLIP:   A large jetliner sitting on top of an airport runway 
 
      BEST with only tags:   This image features a Boeing 737 operated by Royal Air Maroc, Air Arabia, and Turkish Airlines. All three airlines are painted in their respective liveries, with Tronair's logo visible on the fuselage. 
 
 

 
 
   
 
   
      Human Annotation:   A woman is taking an item from the oven that was baking. The individual, whom appears to be a Caucasian female, is wearing a knee length denim skirt, with a long sleeved green shirt. In addition, a brown furry dog is watching intently, the individuals actions. The cabinets in the kitchen are a dull white color, and the floor is a medium toned hardwood.  
      BEST:   This image features a woman preparing food in the kitchen. A dog is at her feet, and a refrigerator with a bottom freezer is in the background. The woman is cleaning or red apron is at right of the image and is moderate-sized in the image. 
 
      Socratic Model:   Two people in a kitchen, possibly a baker and assistant. 
 
      BLIP:   A woman and a small child are in the kitchen 
 
      BEST with only tags:   This image shows a woman in a kitchen, washing dishes. A dog is also in the kitchen, and seems to be helping her with the dishes. This image is from Sweden, and shows how common it is for dogs to help out with housework there. 
 
 

 
 
   
 
   
      Human Annotation:   The clear blue sky in the background reflects off the vibrant white snow. There is a man skiing on the snow. He is wearing a yellow backpack on his back. He has a grey vest over a black long sleeve shirt with black long pants. He snow shoes are yellow and match his yellow skis. He is also wearing a helmet and goggles. The skiers shadow is cast under him on the snow.  
      BEST:   This image shows a man flying through the air while riding skis. He is performing a freestyle skiing move called a ski jump. He is jumping over a snow-covered slope, and his back pack or knapsack is visible at the top left of the image. 
 
      Socratic Model:   Skiing is a snow-based activity that involves sliding down a slope while attached to skis. 
 
      BLIP:   A man flying through the air while riding skis 
 
      BEST with only tags:   This image is of a person skiing down a hill. They are doing a jump in the air and landing on their skis. 
 
 

 
 
   
 
   
      Human Annotation:   Brown cows are lying on the green grass. Behind the meadow there is a small rocky mountain. Some parts of the mountain is covered with grass and shrubs. The cow on the front has two long horns and a long tail. On back a cow is stand facing to the right. On back the meadow is covered with dark green vegetation. 
      BEST:   This image captures a herd of cattle resting on a lush green hillside in Covadonga, Asturias, Spain. The cattle are predominately brown, with a few cream-colored animals mixed in. All the cows are lying down, taking a break from grazing. In the background, the Picos de Europa mountains can be seen rising up into the sky. 
 
      Socratic Model:   Cattle Grazing in a Grassland. 
 
      BLIP:   A herd of cattle laying on top of a lush green hillside 
 
      BEST with only tags:   This image is of the Covadonga Valley in the Picos de Europa mountain range in Asturias, Spain. The valley is known for its stunning beauty and for the Battle of Covadonga, in which a small force of Christian troops led by Queen Olga of Asturias defeated a much larger Muslim army, thus beginning the Christian reconquest of Spain. 
 
 

 
 
   
 
   
      Human Annotation:   A woman is skating around a concrete skate park. It looks like an old swimming pool and her shadow is cast below her by the sun. Both of her feet are on the black skateboard. She is wearing a sleeveless short red dress and black sneakers. Her arms and legs are bare, only the back of her head can be seen. Her hair is bleached blond and she has dark roots showing.  
      BEST:   This image features a woman in a red dress riding a skateboard. The skateboard is positioned at the middle of the image, with the woman's foot on top of it. Her hair is blowing in the wind, and she looks confident and happy while skating. This image is a great example of how anyone, regardless of their gender or dress, can enjoy skateboarding. 
 
      Socratic Model:   A skater enjoying the summer sun. 
 
      BLIP:   A woman in a red dress riding a skateboard 
 
      BEST with only tags:   This image features a young woman skateboarding. She is riding a longboard, and appears to be doing a tricks or manuevers. She is wearing a helmet and other protective gear, and seems to be having fun. This image captures the excitement and thrill of skateboarding. 
 
 

 
 
   
 
   
      Human Annotation:   A white cat with black paws is standing on top of a parked car and standing at the camera. On the windshield of the car is the reflection of a building and the fluffy clouds in the sky. Behind the car there are two buildings and a gray car parked on the street. 
      BEST:   This image shows a white cat sitting on top of a parked car. The cat is looking to the side, and the windshield is slanted. The car is grey and small in the image. 
 
      Socratic Model:   This photo was taken at a car showroom or parking lot and shows a Persian cat perched atop a car. 
 
      BLIP:   A white cat sitting on top of a car 
 
      BEST with only tags:   This image features a small, white car with a kitty perched on the roof. The car has a sunroof, and the kitty seems to be taking advantage of it, sunning itself in the warm afternoon sun. The car seems to be a pet taxi of some sort, and the kitty looks like it's enjoying its ride. 
 
 

 
 
   
 
   
      Human Annotation:   Two desks are in the middle of the floor in an office building. There are two monitors on the desk on the left. There is a desk to the right of if and there is a monitor on it with a cabinet underneath. A gray swivel chair is in front of the desk with two monitors on it. The carpet on the floor is two blue squares that are close in color that alternate to for a checkered floor. There is a wall behind the desks that is all windows and a cement column in the middle.  
      BEST:   This image shows a variety of office objects including a glass desk, office workstations, work stations, and a mit media lab. The glass desk is in the center of the image and is clear and empty. The office workstations are on either side of the desk and are made up of a variety of different objects. The work stations on the left have a blue edge to the chair and blue empty chair. The work station on the right has a white frame and two screens. 
 
      Socratic Model:   This image shows a room with cubicles and computers, possibly indicative of a newsroom or business office. 
 
      BLIP:   A room with a desk, chairs, and a computer monitor 
 
      BEST with only tags:   This image shows a glass desk in an office workstation. The desk is surrounded by computers and office supplies, and has a chair in front of it. This image is from the MIT Media Lab, and shows how a glass desk can be used in a modern workstation. 
 
 

 
 
   
 
   
      Human Annotation:   a plate is full of food on a table. the plate is white in color. the table is made of wood. the wood is medium brown. 
      BEST:   This image features a white plate with a pile of food on it. The food consists of roasted sweet potatoes and mashed sweet potatoes. There is also bread sauce and tofurky on the plate. The plate is sitting on a table next to a bottle of water. 
 
      Socratic Model:   This image shows a group of people enjoying a meal together. The setting appears to be a restaurant or other food service establishment. There is a variety of food on the table, suggesting that there is something for everyone. 
 
      BLIP:   A plate of food on a table next to a bottle of water 
 
      BEST with only tags:   This image is of a plate of mashed sweet potatoes and roasted sweet potatoes. There is also a small dish of bread sauce on the side. The tofurky is pictured in the background. 
 
 

 
 
   
 
   
      Human Annotation:   There is an older Asian man eating a bread type substance. He is on the phone. He has a black bandana around his head. The bandana  has the word tibet written on it. He has a yellow and red striped scarf on. In the background there is a man and woman. 
 
      BEST:   This image shows a man in a scarf talking on a cell phone. He has a hot dog in his other hand, and it is unclear if he is eating it or not. There is a woman in the background who is also on her phone, and there are other people nearby who may be looking at her. 
 
      Socratic Model:   This image shows a man at a fast food restaurant protesting the Dalai Lama's treatment of Tibetans. 
 
      BLIP:   A man with a scarf on talking on a cell phone 
 
      BEST with only tags:   This image is of a Nepali man, possibly a Gurkha, with the words "shutupimtalking.com" written on his forehead. The man has a determined look on his face and seems to be shouting or speaking angrily. 
 
 

 
 
   
 
   
      Human Annotation:   A very clean bathroom is being shown. There is a container of Lysol on the sink. The light is very bright and is being seen in the mirror. There are no towels on the towel rack. 
      BEST:   This image is of a basic half bathroom. There is a toilet and sink, with a mirror above the sink. The countertop and flooring are both white, and the walls are a light green color. There is a small window in the upper right corner of the image. 
 
      Socratic Model:   An empty bathroom with a sink and toilet. 
 
      BLIP:   A bathroom with a toilet, sink and mirror 
 
      BEST with only tags:   This image is of a small bathroom. The room is painted a light green color and there is a white sink and toilet in the room. There is also a shower and tub in the room. The room looks to be in good condition and is clean. 
 
 

 
 
   
 
   
      Human Annotation:   An adult giraffe is licking a baby giraffe. The giraffes are in an enclosure made of grey bricks. The adult giraffe has a long black tongue. The giraffe has brown sports on the neck. The eye of the giraffe is big and black. The left ears of the giraffe is long and pointy. On top of the head there are two horns. The baby giraffe has two thin horns. 
      BEST:   This image features a mother and baby giraffe kissing. The reticulated giraffe is the species of giraffe featured in the image and both animals have moderate-sized nostrils. The baby giraffe is also pictured with a tiny horn on its head. 
 
      Socratic Model:   Giraffes are such majestic creatures, and this mother and her baby are no exception. 
 
      BLIP:   Two giraffes standing next to each other in an enclosure 
 
      BEST with only tags:   This image features two giraffes, one of which is kissing the other on the nose. The reticulated giraffe is a species of giraffe with a distinctive netted pattern on its skin. These animals are native to Africa and can reach heights of up to 18 feet. 
 
 

 
 
   
 
   
      Human Annotation:   A white plate is sitting on a table. There is a knife in front of the plate with a black handle. There is meat on the plate.  
      BEST:   This image features a white plate with a piece of meat covered in sauce. There is also some parsley on the plate, as well as a fork. The meat appears to be either lamb chops or gizzards. 
 
      Socratic Model:   A kitchen staff works hard to create a variety of coq au vin dishes. 
 
      BLIP:   A white plate topped with meat covered in sauce 
 
      BEST with only tags:   This image is of a lavagante, a kidney dish, being served as an antipasti. The ravioli di portobello are also visible in the image. The dish looks to be garnished with parsley and seems to be emitting a savory aroma. 
 
 

 
 
   
 
   
      Human Annotation:   Two red, blue, yellow, and cream candle holders sits on a white shelf next to a small plate. On the table below thee are plates shaped like flowers. The wall behind the shelf is cinder block painted white. On the left of the shelf there is an unpainted wooden bookcase. 
      BEST:   This image contains examples of various pottery styles created by different potters. The footed vase at upper right is made by Cliff Lee Ceramics, the thistle pot at lower left is made by Earthborn Pottery, and the brown vase at left is made by Poole Pottery. The green plate at lower left is made by Clewell Pottery, and the sculpture of a fish at right is made by Ceramic Object. 
 
      Socratic Model:   A beautiful pottery collection on display. 
 
      BLIP:   A table topped with bowls and vases on top of a white shelf 
 
      BEST with only tags:   This is an image of several different types of pottery. There are pieces from Poole Pottery, Cliff Lee Ceramics, Thistle Pottery, Earthborn Pottery, and Clewell Pottery. Each pottery has its own unique style and design. 
 
 

 
 
   
 
   
      Human Annotation:   A table with a white lace table cloth is sitting in a room with a white wall. There is a blue glazed vase with etched flowers on it with a flower with green leaves on it sitting on the table. There is a clear glass bowl on a black metal base to the left of the vase, and there is a bear statue on the right of the vase and a clear glass cup. There is another flower on the ground near the table.  
      BEST:   This image is of a moribana ikebana arrangement on an altar. The table covering is white, and the table has a green candle and a clear bowl on it. The green pot with the orchid is at the upper left of the image, and the green pot with the greenery is at the left of the image. The clear bowl is at the left of the image and is small. 
 
      Socratic Model:   Stunning flowers in an indoor setting. 
 
      BLIP:   A white table topped with a vase filled with flowers 
 
      BEST with only tags:   This photograph shows a moribana ikebana arrangement on an altar. The flowers are arranged in a simple, elegant design, with the focus on a single blossom in the center. The overall effect is peaceful and serene, making it a perfect choice for an altar arrangement. 
 
 

 
 
   
 
   
      Human Annotation:   This is a picture of a living room. The room has a couch in it. The couch is a dark gray color. There are pillows on the couch. The pillows are white. There is a dog on the couch. The dog is blonde colored. The dogs eyes are black. There is a large flat screen TV in the corner. The TV is black and silver. 
      BEST:   This image is of a living room. There is a couch in the background, and a TV in the foreground. There are also several other objects in the room, including a bookcase, a brown box, and a yellow puppy. 
 
      Socratic Model:   A photo of an empty room with a couch. 
 
      BLIP:   A dog laying on a couch in a living room 
 
      BEST with only tags:   This is a snapshot of a typical living room arrangement. In the foreground is a comfortable couch, perfect for sprawling out and taking a nap. In the background, there is a coffee table and TV stand. There is also usually at least one other chair in the room for guests. This image portrays the idea of living comfortably and surrounded by loved ones. 
 
 

 
 
   
 
   
      Human Annotation:   This is a large, black and red train. A jet of steam comes out the side and hits the ground. the train has three headlights on the front as well as an identification number. the door to the front car is slid open and a man stands at the rear of the car doing something. There are trees in the background behind he train. 
      BEST:   This image is of a steam engine on the Harz Railway. The engine is numbered BR99 and is pulling a train of black cars. 
 
      Socratic Model:   A train engine room with a large steam locomotive. 
 
      BLIP:   A black and red train traveling down train tracks 
 
      BEST with only tags:   This image features a steam engine travelling along the Harz railway. The engine is numbered BR99 and is pulling two carriages. The railway runs through the mountains, and the scenery is very scenic. 
 
 

 
 
   
 
   
      Human Annotation:   A group of people are standing in a living room of a home. Part of a brown door is closed to the opening of the living room. Three men are holding white game controllers in their hands. Part of a white sofa can be seen behind the people. An area rug is sitting on the floor in front of the sofa. A string of lights is hanging on a wall behind the people.  
      BEST:   In this image, a group of people are standing in a living room. They are playing a video game using a Wii controller. The man in the black pants is standing tall and is in the middle of the image. He is holding a Wii controller. To his right, there is a man in a brown shirt who is also holding a Wii controller. To the left of the black-pants man, there is a woman sitting at a kitchen table. 
 
      Socratic Model:   A man enjoys his video game in a room with a Filipino flag. 
 
      BLIP:   A group of people standing in a living room 
 
      BEST with only tags:   This image features three people playing various Wii games. In the foreground, a person is playing Wii Boxing, while in the background two other people are playing Wii Party and Wii Play. All three people are having a good time, with smiles on their faces. 
 
 

 
 
   
 
   
      Human Annotation:   A little baseball player is getting ready to hit a baseball. He has a red bat and red helmet on. His shirt is red and yellow and says the cardinals on it and he has some bracelets on. 
      BEST:   This image captures a young boy playing tee ball on a field. He is holding a baseball bat in his hand and looks to be in the midst of batting. The Saint Louis Cardinals logo is visible on the front of his shirt. 
 
      Socratic Model:   A photo of a baseball player in mid-swing. 
 
      BLIP:   A young boy holding a baseball bat on a field 
 
      BEST with only tags:   This image features the Saint Louis Cardinals baseball team. The Cardinals are a professional team that competes in the Major League Baseball (MLB) league. In this image, they are playing in a little league game, or a tee ball game. This is a fun and relaxed image, showing the Cardinals playing against some very young competition. 
 
 

 
 
   
 
   
      Human Annotation:   A little girl is standing in this photo holding a game controller in her hand. She is wearing a dark colored jacket over a gray top and jean pants. Part of a lady's body can be seen behind the girl in the photo. She is also holding a game controller in her hand. She is wearing a dark colored shirt, shorts, and black leggings. They are both standing on gray and maroon carpet tiles in a room. The room has a brown wooden table and chairs in it. 
      BEST:   This image features a little girl holding a Nintendo Wii game controller. She is in a store, and seems to be teaching someone how to play the game. In the background, there is a woman holding a baseball bat, and a girl playing on a Wii. 
 
      Socratic Model:   Many young people enjoying themselves at a toyshop, kindergarden classroom, or youth hostel. 
 
      BLIP:   A little girl holding a nintendo wii game controller 
 
      BEST with only tags:   This image is of a young boy dancing in a playful manner. He is presumably enjoying playing one of the many Wii games available, such as Wii Play, Wii Sport, or Shanghai Kid. The childish glee on his face is infectious and encourages others to join in on the fun. 
 
 

 
 
   
 
   
      Human Annotation:   The blue sky has large white clouds. There is a small white airplane flying over the blue ocean. The airplane is flying very low. Green vegetation is growing on a sandy outcrop at the beach. Small waves are gently rolling ashore. The ocean is very tranquil. The sand is mottled and trampled.  
      BEST:   This image features a white and brown plane flying over the blue waters of Los Roques in Venezuela. The plane is small and appears to be a private aircraft. In the center of the image is the island of Petit St. Vincent in the Grenadines. 
 
      Socratic Model:   An aircraft prepares to land on a small island runway. 
 
      BLIP:   A plane flying over the ocean on a cloudy day 
 
      BEST with only tags:   This image features a plane landing at the airport on the island of Petit St. Vincent in the Grenadines. The airport is located on the northeast end of the island and is serviced by Maldivian Air Taxi, which offers flights from Aruba. The island is known for its white-sand beaches and crystal-clear waters. 
 
 

 
 
   
 
   
      Human Annotation:   A black and red train is on the tracks and has steam coming out off of it. There is another train next to the first train that is orange. There is an overpass over the train tracks with cars on it.  
      BEST:   This image features a train traveling down train tracks next to a train station. The train is a British Railways "Stanier" class 4-6-2 Pacific locomotive, and the train station is the Shildon railway station on the Severn Valley Railway. The train is pulling out of the station, and smoke can be seen coming from the locomotive. 
 
      Socratic Model:   A glimpse into the past of locomotive travel. 
 
      BLIP:   A train traveling down train tracks next to a train station 
 
      BEST with only tags:   This image is of Stanier 5MT 4-6-2 locomotive number 46227 'The Williams Scotsman' departing from the Severn Valley Railway station at Shildon. The locomotive was built in 1946 by the North British Locomotive Company and is one of the last surviving examples of the type. 
 
 

 
 
   
 
   
      Human Annotation:   A bride is wearing her white gown and veil while holding a knife in her hand.  She has red hair and a bruise under her right eye.  A wedding cake is on a table  with white frosting and clusters of dark fruit o top.  The scene takes place outdoors at night. Several cars are either parked or driving down the street. 
      BEST:   In this image, a woman can be seen in a wedding dress standing next to a cake. The cake is white with a few dark patches on it, and the woman is standing in front of a truck with headlights. The bride is looking to the side, and her hand is outstretched. 
 
      Socratic Model:   The best weddings are the ones where you can just eat cake. 
 
      BLIP:   A woman in a wedding dress standing next to a cake 
 
      BEST with only tags:   This image features Rachel, a modest bride, getting married. She is shown wearing a low max dress and carrying a cake, likely for her reception. This image is likely from her wedding day, and showcases her excitement and joy. 
 
 

 
 
   
 
   
      Human Annotation:   The image is of a man's forearm outstretched holding some fruit. The man has light skin and blond hairs on his forearm. He is holding out his left hand, he is holding a bushel of miniature bananas in the open palm of his left hand. They are lying across his fingers, there are seven small bananas. The man is standing on sand that has many shoe and paw prints in it. 
      BEST:   This image shows a hand holding a banana, or plantain. The banana is large in the image and is at the middle of the image. The plantain is at the upper middle of the image and is moderate-sized in the image. 
 
      Socratic Model:   This is a photo of a plantain tree with some bananas hanging off of it. 
 
      BLIP:   A person holding a bunch of bananas in their hand 
 
      BEST with only tags:   This image features a handbanana holding a banana bunch. The benji bananas are prominently featured in the bunch, and the plantain can be seen in the background. 
 
 

 
 
   
 
   
      Human Annotation:   Two giraffes are preparing to mate in an enclosure that is probably located at a zoo.  The male giraffe is larger and is mounting the female giraffe from behind with his penis exposed.  The enclosure is made of masonry blocks at the bottom and horizontal wooden slats at the top. The enclosure walls are brown in color and the giraffes almost blend into the background.  The ground is made of dirt and sandy soil.  
      BEST:   This image features two giraffes running around in the dirt. The two giraffes are standing in the dirt, or the two smaller giraffes is at middle of the image and is moderate-sized in the image. Attribute: baby giraffe's. 
 
      Socratic Model:   A mother giraffe helps her young drink at a zoo. 
 
      BLIP:   A couple of giraffes are running around in the dirt 
 
      BEST with only tags:   This image shows two giraffes running. The giraffes are both of the reticulated variety, and one is shown standing on a large omnibed. The image is clearly taken in a zoo or wildlife park, as there are people in the background looking on. 
 
 

 
 
   
 
   
      Human Annotation:   Two police officers are riding on horses on a city street. They are wearing helmets and yellow jackets with reflective tape. The woman officer is on the left. She is wearing glasses and riding a brown horse who has its head down. The officer on the right is male and is riding a white horse. He is next to a wrought-iron fence. There is a white fan behind the woman officer. There are two people walking on the sidewalk on the far right.   
      BEST:   Two police officers are riding horses on a city street. One is a man in a yellow jacket and the other is a woman in a yellow jacket. They are both riding horses and the man is holding a police baton. 
 
      Socratic Model:   Police officer on horseback in a stable. 
 
      BLIP:   Two police officers riding horses on a city street 
 
      BEST with only tags:   This image shows mounted police and metropolitan police officers on horseback. The Canadian Mounted Police can also be seen in the background. The Horse Guards Parade can be seen in the distance. 
 
 

 
 
   
 
   
      Human Annotation:   A black pickup truck is parked at the sidewalk. On the truck bed is a giant pink chair with brown backrest. Behind the pickup truck is a bronze mini van.  
      BEST:   This black truck has a pink chair on the back of it. The truck is parked on South Street in an urban area. 
 
      Socratic Model:   A sketch of a truck with a Murphy bed. 
 
      BLIP:   A black truck with a pink chair on the back of it 
 
      BEST with only tags:   This image is of a Uhal truck parked on South Street in Philadelphia. The truck is decorated with urban art, and there is a UberBlack sign in the window. 
 
 

 
 
   
 
   
      Human Annotation:   Three men and a woman are standing around each other. They are standing on brown sand. The men are holding long floats under their arms. There is a long fence behind the people. Three portable toilets are sitting near the fence. Some people are standing behind the fence. Large green trees are standing in the background. 
      BEST:   This image is of a group of people gathered on a sandy beach. They are watching someone participate in a mullet toss contest, or perhaps a Phish lawn boy concert, or enjoying the Aquapalooza festival, or celebrating the Woodstock festival, or relaxing at the Bonnaroo music and arts festival. Many of the people in the image are wearing colorful clothing, and some are sporting tattoos. 
 
      Socratic Model:   A group of people enjoying a day at the beach. 
 
      BLIP:   A group of people standing on top of a sandy beach 
 
      BEST with only tags:   This image is of a mullet toss competition. The participants are all wearing Phish t-shirts, and the event is taking place at an aquatic festival called Aquapalooza. The Woodstock festival can be seen in the background, and there are people camping at Bonnaroo in the distance. 
 
 

 
 
   
 
   
      Human Annotation:   A large black bear is sitting on the side of the road. The bear is sitting on its bottom, with its front paws in front of it. The area where the bear is sitting is full of rocks and dirt, with some green grass and weeds. The roadway in front of the bear is graveled. There are trees surrounding both sides of the road.  
      BEST:   This image features a large black bear sitting in the middle of a forest. The bear is black and sits in the shade of a tree, providing some relief from the sun. The bear is a wild animal and should be treated with caution. 
 
      Socratic Model:    American black bear, Ursus americanus, on hindquarters with croup or croupe. 
 
      BLIP:   A large black bear sitting in the middle of a forest 
 
      BEST with only tags:   This image is of a black bear in Arizona. The black bear is the most common bear species in North America and can be found in many different habitats, including forests, mountains, and swamps. They are omnivorous animals, meaning they eat both plants and animals, and can grow to be up to 600 pounds. 
 
 

 
 
   
 
   
      Human Annotation:   There is a man in a black shirt with short dark hair. The man is holding a white wii remote. He is sitting on a yellow couch. There is a picture hanging on the wall above the couch.  
      BEST:   This image is of a man sitting on a couch, holding a video game controller in his hand. The controller is the Wii-style nunchuk, which is used in some Wii games. The man has a white French manicure on his nails and he is looking at the camera. 
 
      Socratic Model:   The two men stand in front of a tundra, controller in hand. 
 
      BLIP:   A man sitting on a couch holding a nintendo wii game controller 
 
      BEST with only tags:   This image features a wii nunchuck controller. The nunchuck is a peripheral for the wii console that allows players to control their characters in games with greater accuracy. The nunchuck has a joystick and two buttons, and is connected to the wii remote by a long cord. This image shows the nunchuck in use, with the player's hand gripping it tightly. 
 
 

 
 
   
 
   
      Human Annotation:   There is a large elephant walking on the dirt. There are two people sitting on a seat on top of the elephant. There are several trees surrounding the elephant.  
      BEST:   This image features a man riding on the back of an elephant. The elephant is in a lush, green forest setting and the man looks happy and excited. This image is a great example of elephant trekking, which is a popular tourist activity in many parts of Asia. 
 
      Socratic Model:   An idyllic playroom or tree house, with an elephant handler keeping a watchful eye. 
 
      BLIP:   A couple of people riding on the back of an elephant 
 
      BEST with only tags:   This image is of a man riding on the back of an elephant through a forest. The elephant is walking through a dense forest, and the man looks like he's enjoying the ride. There are also other elephants in the background, and the overall scene is very peaceful and serene. 
 
 

 
 
   
 
   
      Human Annotation:   a man is cutting up a cake. the cake is white in color. there is a kid next to the white cake. the kid is looking at the cake. 
      BEST:   This image is of a man cutting a cake for a little boy's second birthday. The boy is sitting at the table with a napkin in his lap, and the man is cutting the cake with a knife. There are plates of food on the table, and a wine glass is also present. 
 
      Socratic Model:   A birthday cake for the celebrant, with their helper and support staffers in attendance. 
 
      BLIP:   A man cutting a cake for a little boy 
 
      BEST with only tags:   This image is of a young boy celebrating his second birthday and his baptismal birthday with pizza from PizzaExpress. His father looks on proudly while the boy enjoys his pizza. 
 
 

 
 
   
 
   
      Human Annotation:   A man is surfing in the ocean water. The water is white and grey. The ocean water has bubbles in it. There is a splash of water in the image. The man is wearing shorts. The man is wearing a long sleeve black shirt. The man is standing on a surfboard. The surfboard is yellow. The sky is clear and blue.  
      BEST:   This image captures a surfer mid-cutback. His leg is angled up and back, and his surfboard is slicing through the water. The man is experienced and skilled, as shown by his confident pose and the waves he's tackling. 
 
      Socratic Model:   A surfer enjoying a beautiful day out on the waves. 
 
      BLIP:   A man riding a wave on top of a surfboard 
 
      BEST with only tags:   This image captures a surfer in action, riding a wave. The surfer is positioned at the top of the wave, and appears to be in the process of cutting back, or turning around on the wave. This maneuver can be difficult and dangerous, as it can lead to a wipeout if done incorrectly. The surfer in this image is Chris Ward, who is a well-known and experienced surfer. 
 
 

 
 
   
 
   
      Human Annotation:   A woman is standing on a train platform. She is wearing a scarf on her head, a coat, and a red skirt. She is holding on to a black suitcase. A lot of people are standing across from her on another train platform. They are standing near their luggage. A large building with windows is over a platform. 
      BEST:   This image shows a woman waiting for a train at a station. She is wearing a miniskirt and has a suitcase with her. There is also a conductress on the train platform, and she is wearing a skirtall. 
 
      Socratic Model:   Two people at a train station, one wearing a skirt. 
 
      BLIP:   A woman with a suitcase waiting for a train 
 
      BEST with only tags:   This image features a woman wearing a miniskirt and skirtall as she waits at a train station in London. She is conductress, and her outfit is likely meant to reflect that. The skirt is short and playful, and the overall look is fun and youthful. 
 
 

 
 
   
 
   
      Human Annotation:   A black cat lays on the keyboard of a laptop. the cat is yawnin as it lays down. The cat has a long tail. The laptop is turned on. The laptop is on the desk. There is a bookshelf on the wall, which is filled with many things. There are books on the floor. There are other items next to the wall.  
      BEST:   A black cat is sitting on top of a laptop computer. The cat is yawning and has its right ear up. There is a grey mousepad underneath the laptop and the computer has a dark-wood finish. 
 
      Socratic Model:   A cat uses a laptop at a home office. 
 
      BLIP:   A black cat yawns while sitting on top of a laptop 
 
      BEST with only tags:   This image is of a cat sitting on a lapdesk in front of a printer. The cat is yawning and looking tired. The lapdesk has a built-in mouse pad and the printer has a paper tray. 
 
 

 
 
   
 
   
      Human Annotation:   Two surfers in dark black scuba suits are standing, riding a wave on their surfboards. Standing surfers have one white board, and another board white and orange. Multiple other surfers are behind the initial standing surfers, sitting on their own surfboards, awaiting a wave of their own. All can be seen are the surfers and waves. 
      BEST:   This image is of a surfer riding a wave at Steamer Lane in Santa Cruz, California. The wave is a cutback, and the surfer is riding it close to the curl. There is a Mavericks competition taking place in Baja, Mexico in the background. 
 
      Socratic Model:   The crowd went wild for the surfer nailing the perfect right-hander. 
 
      BLIP:   A group of surfers riding a wave in the ocean 
 
      BEST with only tags:   This image shows a surfer riding a wave in Steamer Lane, Santa Cruz. The wave is a cutback, which is a wave that has broken twice and reformed. The surfer is riding the wave on the inside, or leeward, side. The Mavericks break can be seen in the background. 
 
 

 
 
   
 
   
      Human Annotation:   A man is holding a bunch of bananas. There is a woman in a blue shirt standing next to him. There is a large silver bowl on the table in front of him.  
      BEST:   This image is of the Bogyoke Aung San Market in Phnom Penh, Cambodia. The market is a popular tourist destination, and is home to a variety of different stalls selling everything from spices to produce to clothing. In the center of the image, a woman is seen selling bananas from a basket, while shoppers mill around her. To the right of the image, a vendor is seen selling produce, while an umbrella tent provides shade. 
 
      Socratic Model:   Lao marketplace full of stalls selling fruit, vegetables, and other goods. 
 
      BLIP:   A group of people standing around a table filled with food 
 
      BEST with only tags:   This image features the bogyoke aung san market in central phnom penh. The market is known for its variety of spices, making it a popular destination for shan cuisine. The market is also a popular tourist destination, with a wide range of souvenirs and handicrafts available for purchase. 
 
 

 
 
   
 
   
      Human Annotation:   A red stop sign on a pole. There are black rocks next to the pole. There is a street next to the rocks. There are hills around the rocks.  
      BEST:   This image is of a stop sign in Timanfaya National Park. The stop sign is a moderate size in the image and is at the left side of the image. 
 
      Socratic Model:   A stop sign in the middle of a desert road. 
 
      BLIP:   A red stop sign sitting on the side of a road 
 
      BEST with only tags:   This image is of a stop sign at the entrance to Timanfaya National Park in Lanzarote, Spain. The park is known for its dramatic landscapes, formed by volcanic eruptions centuries ago. The stop sign warns visitors to stop and proceed with caution, as the park is a natural area with many hazards. 
 
 

 
 
   
 
   
      Human Annotation:   The cement side of this building has a silhouette of a man painted in black, to resemble a shadow next to the electrical box on the outside.  On the ground by his feet is a silhouette of a cat.  The man holds a red umbrella in his outstretched hand, to protect the cat from rain.  A bowler hat is on his head and he wears a calf length raincoat.  Graffiti is written over the black silhouette of the man, as well as a few places on the wall.  Some is spray painted onto the electrical box. 
      BEST:   This black and white photo features a woman holding a red umbrella. The woman is standing in the rain, and the red umbrella is her only protection from the wet weather. The umbrella is sitting on top of a cement wall, and behind it, the viewer can see some black graffiti or a man using a pole. The red umbrella is the only splash of color in the image, making it stand out against the dreary background. 
 
      Socratic Model:   A photo of a catacomb in Paris, with an umbrella and a graffito. 
 
      BLIP:   A black and white photo of a woman holding a red umbrella 
 
      BEST with only tags:   This image features a red umbrella being used as a parapluie revel. The red parasol can be seen being used to keep the person underneath dry from the rain, as they appear to be in a hurry. The image is taken in Paris, France, which is known for its heavy rainfall. 
 
 

 
 
   
 
   
      Human Annotation:   This living room has off white walls and a very polished brown floor. There is an area rug that is white and tan. On top of the rug is a white couch and two white chairs. A filled bookcase is up against one wall. 
      BEST:   This image shows a living room with a white couch and chair, as well as a white bookshelf in the background. There is a green plant in a vase on the wooden table, as well as a cat sitting on the couch. The floor is polished concrete with an acid stain finish. 
 
      Socratic Model:   A photo of an empty living room. 
 
      BLIP:   A living room filled with furniture and a book shelf 
 
      BEST with only tags:   This image shows a living room with a concrete floor that has been polished and stained. The floor is a light beige color and has a smooth, shiny finish. There are several pieces of furniture in the room, including a couch, coffee table, and bookshelf. 
 
 

 
 
   
 
   
      Human Annotation:   There is a train in the picture. There are many train tracks. The train is blue, yellow, and white. There are many poles in this picture. The tracks are brown. There are green bushes near the tracks. In the background there is graffiti on the walls in different colors. The poles are grey and tall. The bushes are short.  
      BEST:   This image is of two trains on tracks. The first train is a ScotRail train, and the second train is an HS2 train. The HS2 train is in the background, and the ScotRail train is in the foreground. The HS2 train is a much larger train than the ScotRail train. The ScotRail train has a dark suit on, and the HS2 train has a black face. 
 
      Socratic Model:   This picture was taken at a train station, and it shows the tracks that the trains use to get around. 
 
      BLIP:   A train traveling down train tracks next to a lush green hillside 
 
      BEST with only tags:   This is an image of a rail network with various train lines branching off in different directions. There is a large, central station in the image with many smaller stations located around it. The trains are all travelling at various speeds, and some are even departing or arriving at the stations. 
 
 

 
 
   
 
   
      Human Annotation:   Two people are playing tennis. They are wearing white uniforms. The woman is wearing a tennis skort. She is swinging her racket. The dirt under her is light brown. 
      BEST:   This image features two women playing a game of tennis at Wimbledon. The women are in the middle of the court and are hitting the ball back and forth. The woman on the right is wearing sunglasses, while the other woman has a white shirt and white shorts on. There is also an umpire watching the match from the side. 
 
      Socratic Model:   A tennis player looks on as they serve during a match. 
 
      BLIP:   A couple of women playing a game of tennis 
 
      BEST with only tags:   This image features a tennis match between two women players. The court is situated in Wimbledon, England, and the players are competing in the Women's Tennis Association (WTA) tour. 
 
 

 
 
   
 
   
      Human Annotation:   This is a picture of a man. the man is taking a picture. The man has a hat on. The hat is light brown with a brown designed band. The man has a mustache. The mustache is gray. The man has glasses on. The man is wearing an unusual jacket. The jacket is purple with flower designs on it. The flowers on the shirt are orange, white and red. 
      BEST:   This image features a close up of a paisley vest with a cameraphotoman in the background. The cameraphotoman is taking a picture of a piet oudolf garden with a Peter Max camera. 
 
      Socratic Model:   Creativity is a never-ending fountain. 
 
      BLIP:   A man in a hat taking a picture with a camera 
 
      BEST with only tags:   This image is of a paisley vest with a cameraphotoman taking a picture of a Piet Oudolf garden. Peter Max is in the background. 
 
 

 
 
   
 
   
      Human Annotation:   A silver train is on a track near a platform.  The platform is empty and yellow and white lines are painted on the ground.  There are light poles on the platform.  The train doors are shut and there is gravel in between the tracks.  A building is to the left of the train and trees can be seen in the distance. 
      BEST:   This image features a silver train traveling down train tracks next to a platform. The train looks green, or green rail, or green train is at middle of the image and is large in the image. The caption states that this image is about desiro, dublin dart, south west trains, eireann, and intercity. 
 
      Socratic Model:   A commuter train arrives at a platform train station. 
 
      BLIP:   A silver train traveling down train tracks next to a building 
 
      BEST with only tags:   This image captures a south-west trains Desiro train travelling through Dublin, Ireland. The train is travelling along the InterCity rail line, which connects Dublin with other major cities in Ireland. The train is seen departing from Connolly Station in Dublin, and passing through the suburb of Sandymount. 
 
 

 
 
   
 
   
      Human Annotation:   An airplane is standing on the tarmac. The tarmac is gray with white lines on it. There are some orange traffic cones around the airplane. The plane is relatively small and has two propellers on its wings. It has a tail that is blue. The fuselage of the plane is white. There is a truck parked next to the airplane. The sky is blue. 
      BEST:   This image shows a large propeller plane sitting on the tarmac at an airport. The airplane is white and appears to be either a Canadian North or Estonian Air plane. There is a smaller, blue Dash 8 airplane parked nearby. 
 
      Socratic Model:   This photo was taken at an airport, most likely a tundra or runway. The photo contains a propeller plane, which is boarding passengers. 
 
      BLIP:   An airplane is parked on the tarmac at the airport 
 
      BEST with only tags:   This image is of an ATR 42 aircraft operated by Bearskin Airlines. The aircraft is seen taxiing on a runway at a airport. The aircraft has the Bearskin Airlines livery and is sporting the registration C-FBNB. 
 
 

 
 
   
 
   
      Human Annotation:   A motorcycle is sitting on a round gravel area next to a large bush. The bush is in the center on the gravel pavement.There is half of a tree trunk in the center of the bush. There are 3 small sign on the trunk of the tree. A discolored wooden bend is directly in front of the trunk and bush. The circular gravel area is surrounded be a wooded area. 
      BEST:   This image is of the Heidenau-Rennsteig motorcycle shelter in the town of Holzdrehbank, Germany. The shelter is made of wood and features a black Suzuki Vstrom motorcycle leaning against it. 
 
      Socratic Model:   A photo of a motorbike with a hagberry tree in the background. 
 
      BLIP:   A motorcycle parked next to a wooden bench 
 
      BEST with only tags:   This image is of a motorcycle shelter in the town of Heidenau in the German state of Saxony. The shelter is made of wood and has a turned wooden bench for sitting. There is a sign for the Rennsteig motorcycle trail on the side of the shelter. 
 
 

 
 
   
 
   
      Human Annotation:   A black and white striped zebra stands outside on the ground. The zebra's head is down like it is grazing in the grass. There is a little bit of grass, and a lot of dirt on the ground. There are some rock chunks on the ground. Behind the zebra is a fence post, and a metal fence. There is lush, green vegetation behind the fence. It is a clear sunny day, and the sun is casting shadows of the zebra down on the ground.  
      BEST:   This image features a grevy zebra grazing on some grass in a fenced in area. The zebra is a beautiful animal and is quite large in this image. It looks downward, as if it is taking in its surroundings. 
 
      Socratic Model:   A zebra walks through a pasture. 
 
      BLIP:   A zebra grazing on grass in a fenced in area 
 
      BEST with only tags:   This photograph shows a Grevy's zebra, also known as the Emperor zebra. This species is the largest and most endangered of all the zebras. It is easily identified by its large, rounded ears, and its thin, dark stripes. This particular zebra is a cross between a Grevy's zebra and a donkey, and is known as a zonkey. 
 
 

 
 
   
 
   
      Human Annotation:   This is an enclosure with giraffes. The giraffes are tall and have dark brown and patterned skin. The ground is beige with dirt. There is a grouping of tall trees in the background with brown and green leaves. There is also a zebra laying on the ground. It is black and white. There is a little circle of water for drinking. 
      BEST:   This image is of a busy San Diego zoo. The giraffes are in a habitat that is enclosed by a fence. There are people watching the giraffes from all around the enclosure. 
 
      Socratic Model:   A watering hole for some of the world's most exotic animals. 
 
      BLIP:   A group of people watching giraffes in an enclosure 
 
      BEST with only tags:   This image is of the busy San Diego Zoo. The zoo is home to many different animals, including giraffes. The giraffe habitat is pictured in the background of the image, and the zoo is full of people looking at the animals. 
 
 

 
 
   
 
   
      Human Annotation:   a man is catching a frisbee. he is going in from under his leg. he isn't wearing a shirt. his shorts are actually swimming shorts. the frisbee is white in color. the frisbee is in mid air. 
      BEST:   The man in this image is reaching for a frisbee that is in the air. The frisbee is at the left of the image and is large in comparison to the man. It is possible that the man is dipping down to catch the frisbee, or that he is skimming it across the water. The man in the image is wearing shorts and a t-shirt, and he has a smile on his face, indicating that he is enjoying playing frisbee. 
 
      Socratic Model:   A throwster throws a Frisbee at a windmill while at the beach. 
 
      BLIP:   A man jumping in the air to catch a frisbee 
 
      BEST with only tags:   This image is of a young boy playing frisbee with what appears to be his family. The boy is catching the frisbee and seems to be having a lot of fun. There is also a man skimboarding in the background, which adds an interesting element to the photo. 
 
 

 
 
   
 
   
      Human Annotation:   There's a truck and motioned down the street. The front of the truck is ready. This guy is blue with no clouds. The back and top of the truck is white. Their trees to the left side of the truck. The truck has big black wheels. The headlights on the truck on. There's a puff of black smoke behind the truck. 
      BEST:   This image is of a truck driving down a road in Pinar del Rio, Cuba. The truck is followed by a player on yellow shorts who is running the infield. The Chevrolet truck is in the middle of the image and is moderate-sized. 
 
      Socratic Model:   Three people on a field road with a truck in the background. 
 
      BLIP:   A red and white truck driving down a road 
 
      BEST with only tags:   This image captures a scene of transportation in Cuba. In the foreground, a truck is seen driving down a road, while in the background, a train is seen travelling along a track. The image provides a glimpse into the everyday life of Cubans and the means of transportation they use to get around. 
 
 

 
 
   
 
   
      Human Annotation:   There are two zebras in the wild. The zebras are stripes. The stripes are brown and white. Beside the zebras is a tree. The tree trunk is brown. On the ground are green grass. The tree trunk is thick. The sky is hazy. There are shadows cast on the tree. The zebras' nose are dark brown. The zebras are looking at their left. 
      BEST:   This image shows two zebras standing next to each other in a field. The taller zebra is in the middle of the image and is moderately-sized, while the other zebra is to the right of the image and is also moderate-sized. Both zebras are in the shade of a tree. 
 
      Socratic Model:   A group of zebras congregate at a watering hole. 
 
      BLIP:   Two zebras standing under a tree in a field 
 
      BEST with only tags:   This image depicts a zebra grazing in a field. The zebra is white with black stripes, and its coat is in good condition. This image likely portrays zebras in their natural environment, and it may be from a national park in Tanzania. 
 
 

 
 
   
 
   
      Human Annotation:   This is an image of a kid. The kid is sitting at a table. There is food in front of the kid. The food is light brown. The food is in a plastic yellow basket with white paper. The boy has a black beanie on. The boy has a speckled gray and black sweater on. The child is pointing to the food. There is a red trash bin behind the boy. 
      BEST:   This image features a young boy sitting at a table, eating a sandwich. The boy is wearing a knit cap and mittens, and the sandwich is on a yellow plate. There is a basket of food on the table next to the boy, and a black chair is visible in the background. 
 
      Socratic Model:   Many people enjoying delicious bread at a local bakery. 
 
      BLIP:   A person sitting at a table with a sandwich 
 
      BEST with only tags:   This image is of a young boy eating a hotdog. He is sitting at a table in a canteen, and looks to be enjoying his meal. In the background, another boy can be seen sitting at a different table, eating what appears to be breakfast. 
 
 

 
 
   
 
   
      Human Annotation:   There are two giraffes in a large field with dead grass. The giraffes are walking toward the trees that are in the background. The trees are large and have windy trunks. There is also a mountain behind the trees.  
      BEST:   In this image, we can see a couple of giraffes walking through a dirt field. There is also a juvenile giraffe in the image, which is smaller than the adult giraffes. There is a mountain in the background, and the image gives us a view of the savanna. 
 
      Socratic Model:   The vast acacia plains of Tanzania are home to a wide variety of wildlife. 
 
      BLIP:   A group of giraffes standing in a field with a mountain in the 
 
      BEST with only tags:   This image features a giraffe in the foreground with Mount Kilimanjaro in the background. The giraffe is standing in a grassy savanna habitat with trees and other vegetation nearby. This image gives a good view of the typical African safari landscape. 
 
 

 
 
   
 
   
      Human Annotation:   A man is sitting on a black bench on a paved sidewalk.  A tall red brick building with many black windows is behind the man past a patchy green stretch of land.  A car is parked in front of the building.  The man on the bench is holding a grey cellular phone to his face.  The man is also wearing a black hat, tan and wool fleece coat, creased blue pants and black leather loafers.  There is a large black bag with a long black strap on the man's lap. 
      BEST:   This image is of a man sitting on a bench talking on a cell phone. The man is wearing a bag, or the man has a bag. The man near the bag is at the middle of the image and is moderate-sized in the image. The attribute for this image is duffel. 
 
      Socratic Model:   A Guyanese man uses a payphone in downtown Toronto. 
 
      BLIP:   A man sitting on a bench talking on a cell phone 
 
      BEST with only tags:   This image features a man who is homeless but has managed to make it to Harvard. He is talking on a Verizon phone, which is a Black business. He is a January man, signifying new beginnings. 
 
 

 
 
   
 
   
      Human Annotation:   There are several blue and yellow umbrellas in front of a building. There is a light colored building with a brown room. There is a white clock on the front of the building. 
      BEST:   This image is a close up of a group of blue and yellow umbrellas outside of a building. There are two yellow umbrellas in the image, and they are both positioned at the lower right side of the photograph. There is also a blue awning at the lower left side of the image, and it is moderately sized. Finally, there is a clock on the wall of the building in the upper right side of the photograph, and it is small in size. 
 
      Socratic Model:   A beautiful patio with awnings to keep the sun out. 
 
      BLIP:   A building with a clock on the top of it 
 
      BEST with only tags:   The image shows a number of different market umbrellas. These umbrellas are all different shapes and sizes, and range in color from white to blue to green. Some of the umbrellas are being used as shade in a pool area, while others are sitting on offset patios. 
 
 

 
 
   
 
   
      Human Annotation:   A young girl is sitting on a counter next to a sink, eating a slice of apple. There are other apple slices on a blue bowl next to her. The girl is wearing a striped shirt and orange shorts and has bare feet. An orange Sippee cup is at her side. There is a green glass with two knives in it in the sink. The wall behind the girl is tiled. 
      BEST:   This image features a little girl sitting on a counter in a kitchen. She is eating food from a plate, and looks to be enjoying her lunch. There are various objects in the kitchen visible in the background, including a blue plate with french fries and apples, a sink with green liquid in it, and a blurry photo of a dog and cat. 
 
      Socratic Model:   A little girl eating an apple in a kitchen. 
 
      BLIP:   A little girl sitting on a counter in a kitchen 
 
      BEST with only tags:   This image is of a toddler sitting at a kitchen table with a complete meal in front of them. The meal looks to be healthy and includes a variety of fruits and vegetables. There is also a small carton of milk and a small glass of water on the table. The toddler looks happy and excited to be eating at the kitchen table. 
 
 

 
 
   
 
   
      Human Annotation:   An older couple are playing tennis on a tennis court. They both hold rackets in their hands and are wearing shorts. The tennis court is surrounded by a gate and a wall, and it is possible to see woods and grass in the background. There is a score board on the fence. The markings on the floor are white paint. 
      BEST:   This image features two people on a tennis court. They are both holding racquets and appear to be getting ready to play. The court is nicely groomed and there is a blue sky overhead. 
 
      Socratic Model:   A game of tennis in progress on a beautiful sunny day. 
 
      BLIP:   Two people on a tennis court holding racquets 
 
      BEST with only tags:   This image shows a couple playing tennis together. They appear to be enjoying themselves and appear to be good at the game. The image is taken at Wimbledon, one of the most prestigious tennis tournaments in the world. 
 
 

 
 
   
 
   
      Human Annotation:   This is an image of a street. The street signs are on a white pole. The pole is metal. The top sign is blue and white with a red slash in the middle of it. The bottom sign is white and black with a red circle and red slash in the middle. The top sign has a white border. The street is concrete with rail road tracks embedded in it. 
      BEST:   This image features a road sign that indicates no right turns are allowed. The sign is white with a blue background and features a pedestrian silhouette in the center. The image is blurry and fuzzy, likely due to the motion of the camera. 
 
      Socratic Model:   A photo of an intersection, possibly with a street sign or crossing. 
 
      BLIP:   A street sign with a picture of a person on a horse 
 
      BEST with only tags:   This image features a road sign that indicates that drivers are not allowed to make a right turn or any other turns. The sign is decorated with a pedestrian silhouette, indicating that this rule is in place to protect pedestrians. This image is a great example of an unusual road sign, as it features a rule that is not commonly found in other parts of the world. 
 
 

 
 
   
 
   
      Human Annotation:   A lot of people are skiing on a sunny day at a ski resort. The resort is brown and white and nestled into the valley. In the front there are blue and green umbrellas as if there are stands selling items. On the left of the resort there is a hill with lots of tall pine trees. Toward the camera there is a ski slope which slopes upward on the right. A few people are standing at the bottom of the slope.  
      BEST:   This image is of a ski resort in Norway. There are several people skiing and snowboarding, as well as a person skating. 
 
      Socratic Model:   A group of people enjoying a sunny day at the ski resort. 
 
      BLIP:   A group of people skiing down a snow covered slope 
 
      BEST with only tags:   This image is of a ski resort in the Telemark region of Norway. The resort is nestled in the mountains, and offers skiers and snowboarders access to a number of different trails and slopes. There is a large village at the base of the resort, with a range of hotels, restaurants, and other amenities. 
 
 

 
 
   
 
   
      Human Annotation:   There is a white toilet in a bathroom. There is a black tissue box on the back of the toilet. There is a small black waste basket on the ground next to the toilet. There is a wire rack above the toilet with folded white towels on it. There is a roll of toilet paper hanging off of a counter next to the toilet. 
      BEST:   This image shows a white toilet sitting next to a bathroom sink. The toilet has an automatic flush feature and is sitting in a corner of the room. There is also a trash can in the room next to the toilet. The floor and walls are white, and the sink is chrome. 
 
      Socratic Model:   An empty room with a toilet in it. 
 
      BLIP:   A white toilet sitting next to a bathroom sink 
 
      BEST with only tags:   This image shows a small bathroom with a corner toilet and a half bathroom. The small bathroom is designed for people with disabilities, as it has a wheelchair-accessible shower and a toilet that is easy to reach. The half bathroom is perfect for guests, as it has a toilet and a sink but no shower. 
 
 

 
 
   
 
   
      Human Annotation:   The inside of a train is dark. There are rows of seats next to a large window. There is a person sitting in one of the seats.  
      BEST:   This image features two people sitting on a train looking out the window. The passengers are silhouetted against the light from outside, and they are seated in opposite directions, looking in opposite directions. There is a door to the train at the right side of the image, and a window seat is at left. 
 
      Socratic Model:   This is what it looks like when you're the only one awake on your train car. 
 
      BLIP:   Two people sitting on a train looking out the window 
 
      BEST with only tags:   This image is of a passenger on an Amtrak coach train at night. The passenger is looking out the window at the dark landscape speeding by. 
 
 

 
 
   
 
   
      Human Annotation:   A crowd of people with a green banner are marching on a highway in a large city on a sunny day. Off to the left on the sidewalk police are standing by watching the crowd. Above the there are highway exit signs. In the distance lots of tall skyscrapers are shining in the sun. 
      BEST:   This image shows a group of people walking down a street in Sydney. Many of the people are wearing Australia's colors and some are carrying flags. 
 
      Socratic Model:   The many people at the promenade, arch, or youth hostel. 
 
      BLIP:   A group of people walking down a street 
 
      BEST with only tags:   This image features the Oz Rally in Sydney, Australia. The Sydney Skywalk is visible in the background, and the Sydney CBD is in the foreground. The Sydney Festival is also taking place in the city at this time. 
 
 

 
 
   
 
   
      Human Annotation:   There are five sheep in an enclosure. The sheep are white and black. The sheep's face is black. The fur on the sheep is white. There is a yellow tag on the sheep in the middle who is looking at the camera. There is green grass behind the enclosures. There are bare trees in the background with no leaves. There is a blue sky in the background, too. 
      BEST:   This image is of a herd of sheep standing next to each other. The sheep are all black, except for one white sheep that is standing next to a black sheep. The sheep are all looking forward, and there is a pile of hay in the background. 
 
      Socratic Model:   The black sheep of the family. 
 
      BLIP:   A herd of sheep standing next to each other 
 
      BEST with only tags:   This image is of a group of sheep. In the forefront is a Suffolk sheep, followed by a zwartbles and a texel sheep. In the background are three Romney sheep. The Suffolk sheep is a white sheep with black markings on its head and body. The zwartbles is a black sheep with white markings on its face and legs. The texel sheep is a brown and white sheep. The Romney sheep are all white. 
 
 

 
 
   
 
   
      Human Annotation:   The woman tennis player has a shadow reflecting on the ground. The sun is shining brightly. The tennis player is getting ready to serve the ball. She is holding the ball and her left hand. The ball is lime green colored. The woman's tennis racket is black and red. The woman is wearing a black sun visor. The tennis player is wearing a short white skirt. She is also wearing a black tank top with white down the sides. 
      BEST:   This image features Nicole Conard hitting a backhand stroke. The backhand stroke is a common tennis stroke that is used to hit the ball on the opposite side of the body from where the player is standing. In this image, Nicole Conard is hitting a backhand stroke from the left side of the court. She is standing in the back court and has positioned herself so that she can hit the ball with power and accuracy. 
 
      Socratic Model:   At the tennis court, the power of the player is evident in their focused expression and grip on the racket. 
 
      BLIP:   A woman holding a tennis racquet on a tennis court 
 
      BEST with only tags:   This image features Nicole Conard playing tennis. She is shown hitting a backhand stroke, and serving the ball. Her stance is strong and confident, and her expression is focused. The background is a tennis court, with the net visible in the foreground. This image captures the athleticism and skill required for playing tennis. 
 
 

 
 
   
 
   
      Human Annotation:   A man in snow pants and a ski jacket is snowboarding down a bright white swatch of snow.  There are tall flags dotted around the snow and some people standing about, but this person is the only one going down the slope at the present time.  There are some evergreen trees scattered about the landscape. 
      BEST:   This image features a snowboarder carving down a slope at Grandvalira and Formigal ski resorts in Spain. The boarder is wearing a red jacket and black pants, and has a white helmet on. 
 
      Socratic Model:   This photo was taken at a ski resort, ski slope, or snowfield. I think there might be a piste, opening, gap, boarding, downhill, snowboard, semifinalist, steeper, uphill, course, participant in this photo. 
 
      BLIP:   A man riding a snowboard down a snow covered slope 
 
      BEST with only tags:   This image features a snowboarder carving their way down a slope in the ski resort of Grandvalira in Formigal, Spain. The snowboarder is leaning into their turn, and the board is carving through the snow, leaving a smooth trail behind them. 
 
 

 
 
   
 
   
      Human Annotation:   The room is an image of a bathroom. It has a white sink and a silver metal faucet. On the sink is a bottle of hand soap. The bottle is orange and white with orange pump lid on it. On the other side is an orange cup that is full of toothbrushes. The wall is made of tiles. On the wall is a mirror with wooden frame. 
      BEST:   This image features a bathroom sink with a soap dispenser and toothbrushes. There is a strip on the bathtub or tub is shallow. at the lower middle of the image. The edge of the tub is at lower left of the image and is moderate-sized. The bath cam, handwash, wastafel, lomography, holga are all tags that could be used to describe this image. 
 
      Socratic Model:   A group of people in a bathroom or shower, with a washbasin, handbasin, washbowl, lavabo, wash-hand basin, washstand, wash-hand stand, bathroom, bath, toiletry, toilet articles, soap dish, appliance, contraption, contrivance, 
 
      BLIP:   A bathroom sink with a soap dispenser and toothbrushes 
 
      BEST with only tags:   This image is of a bathroom sink with a hand-washing area. It is from a lomography perspective, with a Holga camera, so the image is distorted and has a soft focus. 
 
 

 
 
   
 
   
      Human Annotation:   A white game controller is sitting on top of a small table in a room. It is connected to a game system. Behind the table is a newspaper that is sitting beside a small decorative lamp. A wall is behind the lamp and paper. Near the lamp is a wooden cabinet with drawers and a door. The handles to the door and drawers are black. 
      BEST:   This image is of a Nintendo Wii game system sitting on a table. The Wii controller is at the left of the image and is small in comparison to the table. The Wii sensor bar is also visible in the image. 
 
      Socratic Model:   A photo of an electronic device in a white room. 
 
      BLIP:   A wii game system sitting on top of a table 
 
      BEST with only tags:   This image is of a Nintendo Wii console with the sensor bar attached. The Wii console is in a vertical position with the ports on the bottom. The sensor bar is in a horizontal position and is above the console. The image appears to be taken from a distance and shows the entire console and sensor bar. 
 
 

 
 
   
 
   
      Human Annotation:   A bathroom has brown tiles going halfway up the walls and on the floor. The tiles are rectangular. There is a small white toilet attached to the wall and a metal gray flusher. There is a small white sink on another wall. The wall above the tiles is a light yellow color, almost white. The walls outside the bathroom are white. 
      BEST:   This image shows a wall mount toilet in a cloakroom. The toilet is a geberit toilet and is in a corner. There is a kabiny prysznicowe next to the toilet. 
 
      Socratic Model:   A photo of a toilet in a utility room. 
 
      BLIP:   A bathroom with a toilet and a sink 
 
      BEST with only tags:   This image shows a wall mount toilet in a cloakroom. The toilet is a geberit model, and is in a corner location. There is a kabiny prysznicowe nearby. 
 
 

 
 
   
 
   
      Human Annotation:   A man is riding a sport bike. He is covered in motor clothes. His jacket is made of leather and is red, black, grey and white. His hands are covered in gloves and his legs are covered with leather pants that match his jacket. The bike he is driving is bright red, black and white. It has a number 13 on the front. The biker is also wearing a full helmet with the shield up so that his eyes and nose are showing. 
      BEST:   This image features a professional motorcycle racer on a Ducati racing bike. The racer is wearing a helmet and visor, and is in the middle of the image. The bike is a racing model, and is very fast looking. This image would be great for use in motorsports marketing or as part of a motorcycle racing article. 
 
      Socratic Model:   This is a photo of a motorcycle racer in action. 
 
      BLIP:   A person riding a motorcycle on a race track 
 
      BEST with only tags:   This image is of Ducati racing motorcycle racer John Hopkins. He is shown in action, racing in the AMA Superbike competition. The photo was taken by Apprilla and captures the intensity and excitement of the race. 
 
 

 
 
   
 
   
      Human Annotation:   The blue water is off to the side of the park. There are a lot of people standing by the water. Some people are sitting down on park benches underneath the trees. Each tree has leafs that are changing color due to the fall weather. 
      BEST:   The Kitsilano Beach area is pictured, with people and a dog visible in the foreground. The Alki Beach area is visible in the background, and the Lausanne region of Switzerland is in the upper-left corner of the image. The University of British Columbia campus is visible in the lower-left corner of the image. The Geneva, Switzerland skyline is visible in the upper-right corner of the image. 
 
      Socratic Model:   A photo of a beautiful lakeside park. 
 
      BLIP:   A group of people sitting on a park bench 
 
      BEST with only tags:   This image is of two popular beaches in Vancouver, Kitsilano and Alki. Both offer expansive views of the city and the surrounding mountains, and are popular spots for swimming, sunbathing, and playing in the sand. The UBC campus is also visible in the distance. In the foreground, a couple walks along Lausanne Promenade in Geneva, Switzerland. 
 
 

 
 
   
 
   
      Human Annotation:   A red and yellow train moves along the track.  One side of the track is lined with trees.  There is a single light near the window on the front of the train. 
      BEST:   This image shows a red and yellow freight train travelling down a set of train tracks. The locomotives are in the centre of the image, and the freight cars stretch out behind them. The train is travelling southbound, and there is a grain train in the background. 
 
      Socratic Model:   The diesel-electric locomotive chugs along the tracks, pulling a long line of cars behind it. 
 
      BLIP:   A red and yellow train traveling down train tracks 
 
      BEST with only tags:   This image shows a grain train, southbound, freight train, 55452rtb, kra4813. The train is seen travelling through a rural area, with fields and trees visible in the background. The locomotives are pulling several freight cars, most of which are loaded with grain. 
 
 

 
 
   
 
   
      Human Annotation:   two signs are on a pole. the signs are green in color. the sign has white writing on it. the sky is very grey and cloudy. 
      BEST:   This image features a pole with two street signs on top of it. The signs are both silver, and one reads "Silverville Indiana" while the other reads "Staunton IL". There is a small amount of graffiti on the sign reading "Shevonne". 
 
      Socratic Model:   This photo shows an empty street with a street sign in the foreground. 
 
      BLIP:   This image is about street sign, strassennutte, silverville indiana, staunton il, shevonne 
 
      BEST with only tags:   This image is a street sign for Silverville, Indiana. It is made of silver metal and has black lettering. The sign is curved and points to the right. It is tilted downwards slightly. There is a small, black arrow near the bottom of the sign that points in the direction of Silverville. This image also shows a street named Staunton in Illinois. The road is made of asphalt and has white lettering on a green background. 
 
 

 
 
   
 
   
      Human Annotation:   A woman and a little boy are sitting in bed looking at two cats.  The woman has glasses on and a long sleeved striped shirt.  The boy has short dark hair and is wearing a blue tshirt with a pattern on it and a red collar.  The two cats are lying on the bed next to eachother.  The cat on the left has white, orange, and black fur.  The cat on the right is black and grey striped.  The bed spread is blue colored and has a celestial pattern of suns and moons.  The headboard is made of wood.  Next to the bed is a nightstand made of wood.  On top of the night stand is a lamp, book, and several small items.  There is also a small table to the right of the picture with items on it.  The wall appears to be white. 
      BEST:   This image is a picture of a woman and two cats lying on a bed. The woman is sitting on the bed with the cats and there is a pamphlet on the bed next to her. One of the cats is a calico cat and the other is a tabby cat. The cat on the blue blanket is a tabby cat. The woman sitting next to the child on the bed is wearing glasses and she has a middle-aged appearance. 
 
      Socratic Model:   This photo shows three people in a bedroom. One person is lying in bed, while the other two are sitting on the bed. This looks like a cozy place to sleep and relax. 
 
      BLIP:   A woman and two cats laying on a bed 
 
      BEST with only tags:   This image is of a family of bedding experts, the Zigas. They own the company Incredibed, which makes some of the best sprei and yatak in the world. The Zigas are a close-knit family, and they work hard to make sure their products are the best they can be. 
 
 

 
 
   
 
   
      Human Annotation:   Cows are standing in a field. There are many cows and some are black in color, while the others are white and brown. There is a person standing behind the cows dressed in a white robe. The person's arms are out to the sides with hands resting on the person's waist. The sky is cloudy. There are trees in the back of the field. 
      BEST:   This image is of a cattle farm with several different types of cattle. There is a shorthorn or bull at the lower right corner of the image, and a small black bovine at the lower left corner. There is also a blurry animal in the center of the image, which may be another cow. In addition, there are several sheep in the image, all of which are white. 
 
      Socratic Model:   A peaceful scene of cattle grazing in a lush field. 
 
      BLIP:   A black and white photo of a herd of cattle 
 
      BEST with only tags:   This image is of a cattle farm with many cows in the field. There are also some buildings in the background, possibly a farmhouse or barn. This image is from the early 1900s and provides a snapshot of rural life at that time. 
 
 

 
 
   
 
   
      Human Annotation:   A large truck has a blue cabin and a red container attached to the back of it. It is sitting on a parking lot that's surrounded by leafless trees. The sky is blue and it is sunny. There is shadow on the ground near the truck. 
      BEST:   This image features a blue semi truck parked next to a red dump truck in a parking lot. The blue truck is a Mack Granite model, while the red truck is a Mack Roll Off model. Both trucks feature the Mack logo on their sides. 
 
      Socratic Model:   At the end of a long day, this trucker is ready to hit the road. 
 
      BLIP:   A blue semi truck parked next to a red dump truck 
 
      BEST with only tags:   This image is of a Mack truck. The truck is white and has a blue and silver stripe running down the side. The truck is a Mack Granite model and has a Mack Roll Off body. The truck is also fitted with a Mack CXU613 engine. 
 
 

 
 
   
 
   
      Human Annotation:   A large yacht is riding through a clear, and calm body of water. The boat is predominately white, with hints of red throughout. In addition, the boat has a red and white flag to the very front of the vessel. In the background of the boat, there is a village made of various houses that are close to the shoreline. In addition, there are several hillsides that are made of trees and other foliage.  
      BEST:   This image is of the towns of Brienz and Interlaken in Switzerland, with the lake Thun in the foreground and the lake Lucerne in the background. The red and white boat in the center of the image is the Croatia Express ferry. 
 
      Socratic Model:   A ferryboat docked at a lakeside. 
 
      BLIP:   A large boat floating on top of a body of water 
 
      BEST with only tags:   This image is of the lakes Brienz and Thun in Switzerland. The towns of Interlaken and Spiez are visible on the opposite shores of the lakes. The water is a deep blue and the mountains are a pristine white, providing a beautiful contrast. 
 
 

 
 
   
 
   
      Human Annotation:   The image is of a large master bathroom in a house. The flooring of the bathroom is a sandy colored ceramic tile. The counter top appears to be a light colored marble with the kind of sink that sits on top of the counter instead of being dropped into the counter to make it flush. There are no cabinets under the counter and the mirror above the sink spans the whole counter top area with fluorescent lights on each side. There is a large and deep white tub opposite the sink area and behind that is a large walk in shower encased in glass. Adjacent to the sink is another glassed-in room that could possibly be a personal sauna. 
      BEST:   This image shows a white sink that is small in the image and is located to the right of the image. The sink is in a countertop and there is a marble bathroom behind it. The bathroom has a contemporary style and features a luxor spa suite. 
 
      Socratic Model:   A photo of an indoor jacuzzi or utility room, with a shower stall and washbasin visible. 
 
      BLIP:   A bathroom with a sink and a bathtub 
 
      BEST with only tags:   The image shows a contemporary bathroom with a luxor spa suite. The suite includes a large marble bathroom with a bathtub and a separate shower. There is also a dual vanity area and a toilet. The suite is finished with contemporary fixtures and fittings, and has plenty of storage space. 
 
 

 
 
   
 
   
      Human Annotation:   Long red and white double-decker buses are parked under a white overhang. The white overhang is erected next to a short, brick building with many windows.Three antennas are attached to the side of this building just over the windows. Cars are traveling down a road pass the double-decker buses and there are cars parked in a small lot which sits near the short, brick building. 
      BEST:   This image is of a bus station, which is in the city of Cardiff in the country of Wales. The bus station has a few buses parked in it, along with a few other objects. There is a double decker bus in the middle of the image, and it is small in comparison to the other objects. To the left of the image is a red and white bus, and it is also small. 
 
      Socratic Model:   A busy bus station with people waiting for their ride. 
 
      BLIP:   A group of buses parked in front of a bus station 
 
      BEST with only tags:   This image shows a bus station in Victoria, England. The bus station is a large, multi-level building with a variety of bus bays and loading areas. There is also a large, open plaza in front of the station, which is often used for events or protests. The station is a popular transportation hub, serving the city of Carlisle and the wider Cumbria region. 
 
 

 
 
   
 
   
      Human Annotation:   A cat is positioned in front of an apple computer and keyboard.  It's fur is blackish brown.  His eyes are green.  A white mouse is sitting on the black mouse pad.  A router is positioned against the wall on the computer desk. 
      BEST:   This image features a black cat that is lying down on a desk next to a computer. The mouse is white and is hiding underneath the keyboard. There is also an apple imac computer on the desk. 
 
      Socratic Model:   This photo features several people in a home office, possibly with a Burmese cat. The cat may be showing off its behind, or the people may be working hard at their desk. 
 
      BLIP:   A cat laying on a desk next to a computer 
 
      BEST with only tags:   This image is of a cat, sitting on a desk and using a laptop. The cat seems to be very comfortable, using the keyboard as a lap desk and with its tail draped over the edge. This is a cute and funny image, showing how cats can adapt to any situation. 
 
 

 
 
   
 
   
      Human Annotation:   This picture is taken inside of a cubicle of an office. The cubicle has two windows above it. A black laptop computer is sitting beside a desktop computer screen on a curved desk. There is a purple coffee mug sitting in front of the laptop. A black phone sits on the desk across from a desk chair. The chair is orange and black in color. 
      BEST:   This image features an office cubicle with a laptop and a desktop computer. The cubicle has orange chairs and a computer. The chair behind the desk has curves and the desk has a keyboard. The laptop is likely a netbook and the desktop computer is a monitor. 
 
      Socratic Model:   A typical scene in a modern office: computers, monitors, and workstations. 
 
      BLIP:   An office cubicle with a laptop and a desktop computer 
 
      BEST with only tags:   This is an image of a cubicle desk. The desk has a cubicle-style design, with a high back and sides that enclose the work area. There is a computer monitor and keyboard on the desk, as well as a telephone and other office supplies. The desk is in a cubicle environment, with other cubicles visible in the background. 
 
 

 
 
   
 
   
      Human Annotation:   The field is filled with tall grass. The grass is green with orange tops. There is a person in the field. He is wearing a red long sleeves shirt with a pair of jeans. The playing with a red frisbee that has been thrown over his head. In the valley in the background there are green trees and a houses.  
      BEST:   This image shows a person in a field catching a frisbee. The person is in the air, and their arms are stretched out to catch the disc. The person in the field is small in the image, and they are in the middle of the photograph. 
 
      Socratic Model:   A photo of an empty field with a lone throwing stick. 
 
      BLIP:   A person in a field with a frisbee 
 
      BEST with only tags:   This image is of a person playing frisbee. They are doing a freestyle trick where they are flipping the disc over their head. The disc is flying through the air and the background is a grassy field. 
 
 

 
 
   
 
   
      Human Annotation:   Two women are sitting in front of a computer in a room. The computer is sitting on a brown desk in front of a blue wall. Different pictures are hanging on the wall. One of the women is wearing a dark colored top, and eyeglasses. The other woman is wearing a long sleeve green and white shirt. She also has a watch on her arm.  
      BEST:   In this image, two women are looking at a laptop screen. One woman is looking at the screen with concentration, while the other woman is sitting next to her and using the computer. There is text on the screen that reads "mathletics," "www.primaryresources.co.uk," "moodle.com," and "typeonline." There is also a BBC Learning English logo in the bottom-left corner of the image. 
 
      Socratic Model:   A group of students and staff members gathered around a computer system. 
 
      BLIP:   Two women are looking at a laptop screen 
 
      BEST with only tags:   This image depicts a student using a computer to complete a math problem. The student is likely using a website such as mathletics.com or typeonline.co.uk to complete the problem. The website may also be providing help and instruction to the student as they work. The background of the image shows a classroom with other students working on their own tasks. This image communicates the idea that online resources can be helpful for students when completing math problems. 
 
 

 
 
   
 
   
      Human Annotation:   a plane is flying in the air. the plane is all white in color. the plane is very pointy. the sky is very blue. the clouds are very fluffy. 
      BEST:   This image features a fighter jet flying through a cloudy blue sky. The jet has yellow wings and a sharp tail, and appears to be mid-sized in the image. This military aircraft is likely an F/A-18 Hornet. 
 
      Socratic Model:   This photo captures the power and grace of a fighter jet as it streaks across an empty sky. 
 
      BLIP:   A fighter jet flying through a cloudy blue sky 
 
      BEST with only tags:   This image is of a super hornet fighter jet. The super hornet is a variant of the f18 fighter jet, and is used by the US Navy. This image shows the super hornet in flight, with its wings swept back. The super hornet is a very advanced fighter jet, and is capable of carrying a wide range of weapons. 
 
 

 
 
   
 
   
      Human Annotation:   Three trucks are in the center of the road in this picture.  Two of the trucks are white and one of the trucks looks dark in the shadows.  A church with a red cross is to the right of the road.  The sky is cloudy. 
      BEST:   This image shows a variety of military trucks, including the FMTV, Mrap, and M985. The trucks are all parked in a row, and appear to be waiting to be loaded or unloaded. 
 
      Socratic Model:   A photo of a large military vehicle parked in a driveway or parking lot. 
 
      BLIP:   A military truck driving down a street next to a building 
 
      BEST with only tags:   This image shows a convoy of army trucks. The lead truck is a FMTV, followed by two MRAPS, and then two M985s. The last truck is an M1085A1. 
 
 

 
 
   
 
   
      Human Annotation:   The image is of a man with his right foot on a long skate board. He is wearing a blue t-shirt and gray jeans. His sneakers are gray with a yellow-orange sole. He has a black backpack on his back and is wearing sunglasses. He is bald and has his right arm in an upright position in front of his chest. The location is a residential street that has row houses on the left. 
      BEST:   This image captures a man surfing on a longboard down a city street. The skateboarder is wearing jeans and a black backpack, and appears to be performing a carveboard maneuver on the street. 
 
      Socratic Model:   A skateboarder navigating the city. 
 
      BLIP:   A man riding a skateboard across a street 
 
      BEST with only tags:   This image is of a young man riding a longboard down a sidewalk. He is carving back and forth, and appears to be having a lot of fun. The board looks like a carveboard, which is designed for this type of riding. This is a great way to enjoy the streets and get some exercise at the same time. 
 
 

 
 
   
 
   
      Human Annotation:   a woman is behind a man. the woman has blonde hair. the man is playing piano. the piano is black in color. they are both smiling. 
      BEST:   This image features a man and woman playing a piano together in a living room. The man is sitting at the piano while the woman is standing behind him, hugging him. They appear to be enjoying playing the piano together and appear to be very close. 
 
      Socratic Model:   Two people enjoying a musical moment together. 
 
      BLIP:   A man and woman playing a piano in a living room 
 
      BEST with only tags:   In this image, sting and trudie are shown in a passionate embrace, lost in love. Air supply is playing in the background, providing a romantic soundtrack to their moment. This image captures the intense, passionate nature of a true romance. It also hints at the danger of fatal attraction, showing that even the happiest couples can be undone by love. 
 
 

 
 
   
 
   
      Human Annotation:   a kite is in the sky. the kite is light blue in color. people are flying the kites. the sky is very blue and has wispy clouds in the sky. 
      BEST:   This image features a man kiteboarding. He is using a slingshot kiteboard and is being pulled along by an ozone kite. The man is in the process of making a jump, and he can be seen sailing through the air with the kite in tow. The background of the image is a picturesque view of the ocean, with mountains in the distance. 
 
      Socratic Model:   Two people enjoying a beautiful day out on the water, with a kite flying high above them. 
 
      BLIP:   Two people on a beach flying a kite 
 
      BEST with only tags:   This image is of a person kiteboarding. They are using a slingshot kite and seem to be having a lot of fun. The water is blue and the sky is a bright blue. 
 
 

 
 
   
 
   
      Human Annotation:   A man stands in the snow. He is holding a black pole. There are trees behind the man. There are tracks in the snow. The man is wearing a dark colored cap.  
      BEST:   This image features a man skiing down a snow-covered slope. The man is wearing skis and appears to be having a great time. There is also a dog standing in front of a fountain, and a man in a helmet and holding a snowboard. 
 
      Socratic Model:   A skier jumps off a cliff in the mountains. 
 
      BLIP:   A man riding skis down a snow covered slope 
 
      BEST with only tags:   This image shows a man skiing down a snowy slope. He is accompanied by a large dog that is pulling him along with a ski harness. The man has a thick beard and is wearing a helmet and goggles. He is skiing through a narrow chute in the mountains, surrounded by tall trees. 
 
 

 
 
   
 
   
      Human Annotation:   On a beach with grey sand several people are walking about, and some are standing in the waves by the shore. One man is getting ready to throw a white Frisbee. He is wearing grey long swim trunks. Behind him a woman sits in a beach chair set low to the sand. The water is mild, with only a few small waves rolling into the shore. The day is sunny and the sky is a medium blue. 
      BEST:   This image shows a man standing on a beach holding a frisbee. He appears to be in the midst of a game, as he is looking down at the frisbee with an intense expression. There are also several people in the background who are either playing or watching the game. 
 
      Socratic Model:   Two people play with a Frisbee on a beach. 
 
      BLIP:   A man standing on top of a beach holding a frisbee 
 
      BEST with only tags:   This image shows a young man playing frisbee on the beach. He is surrounded by sand and ocean, and appears to be having a great time. In the background, a few people can be seen skimboarding and playing beach tennis. This image captures the carefree spirit of summertime fun. 
 
 

 
 
   
 
   
      Human Annotation:   Five lit candles are decorating a square cake. There is a pink candle in each corner and a white one in the center of the cake. The frosting is white. Some chocolate crumbs are visible along the bottom edges of the cake and on the plate. The cake is on a round blue plate. It is on a wood-looking table.  
      BEST:   This is a picture of a white birthday cake with three pink candles on a blue plate. 
 
      Socratic Model:   A birthday cake in an empty room. 
 
      BLIP:   A cake with three candles on top of it 
 
      BEST with only tags:   This image is of a birthday cake. The cake is covered in white frosting and has blue and pink sprinkles on top. There are three lit candles in the center of the cake. 
 
 

 
 
   
 
   
      Human Annotation:   Workers taking a break outside a building seem to focused on their cellphones.  They are all dressed in black, suggesting they are in a company outfit.  Four of the five workers are looking at their phones. The fifth one is looking out, but appears to be holding a phone.  Three of the workers are white, two black.  They are all men.  A woman is walking by the men, unnoticed.  It is daytime. 
      BEST:   This image is of the NYPD precincts in New York City. In the lower right hand corner of the image, there is a man who is taking a picture. He is dressed in all black, and he appears to be surprised. In the lower left hand corner of the image, there is a woman who is wearing white shoes and white pants. She is also barefoot. At the lower middle of the image, there is a man who is dressed in all black. 
 
      Socratic Model:   A group of people waiting in line at a box office or ticket booth. 
 
      BLIP:   A group of people standing on the side of a street 
 
      BEST with only tags:   This image is of the NYPD precinct in Hell's Kitchen. It shows the NYPD detective adjusting the bureau. 
 
 

 
 
   
 
   
      Human Annotation:   The person is on a horse going over a jump. There horse is dark brown with a white stripe on its nose. The person has a black helmet on. The poles being jumped over are striped white, brown, orange, and green. 
      BEST:   This image features a horse and rider jumping a gate. The rider is wearing white shorts and a green bridle. The horse is jumping the highest jump in the competition. The jumping gate is at the lower left of the image and is small in comparison to the horse and rider. 
 
      Socratic Model:   A liver chestnut horse at a stable. 
 
      BLIP:   A person on a horse jumping over an obstacle 
 
      BEST with only tags:   This is a photograph of horse jumping during a show jumping competition. The horses and riders are negotiating a large, daunting obstacle in the form of a jump. The horses are galloping at full speed, and the riders are leaning out to stay in control. This is an exciting and adrenaline-pumping image of horse jumping at its best. 
 
 

 
 
   
 
   
      Human Annotation:   Two horses are attached to a carriage. A person sits in front so they can lead the horses. Somebody sits in the back of the carriage. The wheels are big and yellow. The carriage is next to a building. The building has some statues in the front of it.  There is a little piece of concrete next to the carriage. There are windows in the buildings. 
      BEST:   This image features a horse-drawn carriage driving through the Michaelerplatz in Vienna. The carriage is decorated with ornate carvings and the horses are decked out in elaborate harnesses. There is a man riding in the carriage, and people can be seen watching from the sidelines. The Carriage Museum is visible in the background. 
 
      Socratic Model:   The best way to see the sights is from a horse-drawn carriage. 
 
      BLIP:   A horse drawn carriage on a city street 
 
      BEST with only tags:   This image is of a caleche, or horse-drawn carriage, parked in front of the Michaelerplatz in Vienna. The carriage is very ornate, with Baroque-style horses hitched to it. There are several people walking around the square, enjoying the sights and sounds of the city. 
 
 

 
 
   
 
   
      Human Annotation:   A large virgin jet flying over a city. The jet has two large engines that are visible. The tale fin of the jet is red with white writing. The sky the jet is flying in is mostly blue with large gray clouds. There are many windows on the side of the jet. there is a tall tower with a pointy top under the jet. There are many tall buildings under the jet. 
      BEST:   This image features a large jetliner flying through a blue sky. The aircraft is a red and white Airbus 320, also known as Virgin America, Virgin Aircraft, or Virgin Air. The plane is flying in the middle of the image, and is a moderate size in comparison to the other objects in the photograph. 
 
      Socratic Model:   A photo of an aircraft at an airport. 
 
      BLIP:   A large jetliner flying through a blue sky 
 
      BEST with only tags:   This image is of a red-colored airplane with the Virgin Airlines logo on its side. The plane is a model A321, and appears to be landing at a airport. 
 
 

 
 
   
 
   
      Human Annotation:   A lone horse is walking on a field of dirt near a pile of dirt. The dark horse has a dark mane, and tail. His mane is flat, and on both sides of his neck. The horse has his head down as he walks forwards. There are dark bits of mud kicked up in front of the horse. The grassy field is lumpy and uneven.  
      BEST:   This is a black and white photo of a horse walking in a field near a mountain. The horse is black and is the center of the image. It is a moderate size in the image. 
 
      Socratic Model:   A wild horse roams a vast tundra. 
 
      BLIP:   A horse walking in a field near a mountain 
 
      BEST with only tags:   This image shows a black horse standing in front of a mountain backdrop. The horse has a powerful build and is looking alertly at the viewer. This could be a portrait of a wild horse that is living free in the mountains. 
 
 

 
 
   
 
   
      Human Annotation:   There is a bear in the woods. The bear is big and he is black in color. The bear appears to be eating the grass. The grass is green and there is water in it. The bear is shaking water off of himself. There is a tree in the left side of the picture. There are green leaves on the tree and bushes in the background.
 
      BEST:   This image captures a black bear in the woods of Maine. The bear is a medium-sized animal, and it is standing in a grassy area next to some trees. The bear's fur is mostly black, but it has a light-colored muzzle and chest. 
 
      Socratic Model:   A young American black bear enjoying the outdoors. 
 
      BLIP:   A black bear walking through a lush green forest 
 
      BEST with only tags:   This image is of a black bear cub in Maine. It is likely an American black bear, Ursus americanus, although it is possible it could be a grizzly bear, Ursus arctos horribilis. The cub is black with a small amount of white on its chest. It is sitting in the grass and appears to be looking at the photographer. 
 
 

 
 
   
 
   
      Human Annotation:   A man with ginger colored hair and eyeglassses is sitting on a brown couch in a living room using a laptop.  The man is dressed in a greyish brown fleece shirt with a black shirt under neath it.  There are various blue pillows on the brown couch including a finding nemo pillow and a stuffed parrot.  The room he is in is painted blue with blue curtains. 
      BEST:   This image shows a man sitting on a couch using a laptop computer. He appears to be in a home office or study, as there is a desk with papers and folders on it in the background. He may be Skyping with someone, as there is what looks like a Skype logo on his laptop screen. 
 
      Socratic Model:   Person using computer in home office. 
 
      BLIP:   A man sitting on a couch using a laptop computer 
 
      BEST with only tags:   This image features a sofa with a laptop on it and a person sitting in front of it, presumably doing homework. There is also a home office in the background with a desk and chair, as well as a window. Finally, there is a Skype call open on the laptop, with the husband's face visible. This image is meant to depict how technology can help couples stay connected while they're apart. 
 
 

 
 
   
 
   
      Human Annotation:   Image of an outdoor farm. The farm has multiple rolling hills on it. There are white sheep and livestock walking around the field. There is a small stone wall down the middle of the farm. There are large green trees with lots of leaves on the hillside. In the distance the sky is covered with a light patch of puffy white clouds that can be seen on the horizon.  
      BEST:   This is an image of the Wharfedale, Yorkshire Dales, and Swaledale regions in England. In the foreground is a white ewe or sheep, and in the background are rolling green hills and sheep grazing. This image captures the rural beauty of the English countryside. 
 
      Socratic Model:   A beautiful country scene with luscious green grass. 
 
      BLIP:   A herd of sheep grazing on a lush green hillside 
 
      BEST with only tags:   This image features the Wharfedale and Swaledale Valleys in Yorkshire, England. The countryside is lush and green, with rolling hills and sheep grazing in the fields. This is a beautiful and peaceful scene, perfect for enjoying the natural beauty of the English countryside. 
 
 

 
 
   
 
   
      Human Annotation:   A person is in mid air in a jump pose with a snowboard attached to their feet.  The person is wearing a black hat, pants, gloves and red jacket.  The person is in the air above a snow covered steep ski slope.  The sky is white with clouds and a few sections of pastel blue.  The sun is in the background and glowing as a white round and bright circle in the sky with a white haze of clouds over it.  A ornate type graphic in green-yellow and pink lettering is at the bottom of the ski slope.  Trails of narrow white lines are in the sky with the clouds.  Another person can be see in the background at the bottom of the slope in the background. 
      BEST:   This image features a man riding a snowboard down a snow-covered slope. At the upper right of the image, there is a skater in midair, doing a trick. This image is about snowboard wallpaper, slopestyle snowboarding, shaun white snowboarding, snowboarding halfpipe, and terrain park. 
 
      Socratic Model:   Skiing is a great way to enjoy the winter! 
 
      BLIP:   A man flying through the air while riding a snowboard 
 
      BEST with only tags:   This image features a snowboarder performing a trick in a terrain park. The rider is airborne, and their board is extended out in front of them. The background is snowy and mountainous, and the sun is shining brightly in the sky. This image captures the excitement and danger of snowboarding in a terrain park. 
 
 

 
 
   
 
   
      Human Annotation:   A green vase sits on a white wicker table. The vase has a spherical bottom, and a skinny neck at the top. It is full of water, and purple violets, with a few green leaves. The background is greenish gray, and has a brushstroke pattern. There is bright sunlight, which is casting shadows of the vase onto the white table.  
      BEST:   This image is of a green glass vase with purple flowers in it. The vase is in the center of the image and is moderate sized. The flowers are purple and look like sweet violets or wild violets. 
 
      Socratic Model:   A beautiful array of violets in a glass bell jar. 
 
      BLIP:   A green vase filled with purple flowers on a table 
 
      BEST with only tags:   This image features a purple vase filled with sweet violets. There is also a green vase in the background, and the overall effect is quite pretty. 
 
 

 
 
   
 
   
      Human Annotation:   Many narrow kayaks sit in the water. They are all bright colors.The water is still and flat. Next to the water is a fence. There is a bridge over part of the water. There are many trees next to the water. A tree branch covers some of the boats. There are the reflections of many trees in the water. The sky above is clear. 
      BEST:   This image is of several canoes lined up on the shore of a lake. The canoes are all in different colors, including yellow, green, and blue. 
 
      Socratic Model:   A group of people paddle their kayaks down a urban canal. 
 
      BLIP:   Several canoes are lined up on the shore of a lake 
 
      BEST with only tags:   This image shows a variety of kayaks, including mainstream kayaks, pedal kayaks, and eddyline kayaks. The feel free kayaks are in the foreground and seem to be popular for their comfortable seats. 
 
 

 
 
   
 
   
      Human Annotation:   the table is full of snack foods. there is a big black tray on the side. the tray is full of small plastic cups. the cups are full of shredded cheese and hot sauce. there is another tray of hot sauce next to it. 
      BEST:   This image shows a blue table with a variety of food items on it. There are plates of food, bowls of food, and trays of food. The food ranges from salads and carrots to pasta and cake. There are also condiments such as pickles and jalapenos, and a variety of utensils including forks, spoons, and knives. 
 
      Socratic Model:   A wonderful array of cuisine to feast your eyes (and stomach) on! 
 
      BLIP:   A blue table topped with plates of food 
 
      BEST with only tags:   This image features a series of deli cups and catering trays arranged to create the appearance of a miniature 'snackadium.' The snacks in the image include various types of chips, crackers, and dip. This image is representative of the types of food that can be served at a banquet or other large event. 
 
 

 
 
   
 
   
      Human Annotation:   There is a long legged small bird standing in a body of water. The bird is snow white with almost tan wings. It has an orange beak with a jet black tip. The overall image is picturesque as you can even see the bird's shadow in the ripples of the water. The bird literally captures the center of attention as the photographer has captured the bird perfectly dead-center of the shot. 
      BEST:   This image is of a piping plover. It has black feet and a white front leg. It is medium-sized in the image. 
 
      Socratic Model:   A photo of a bird wading in the water. 
 
      BLIP:   A bird standing in shallow water on a beach 
 
      BEST with only tags:   This image features a close up of a piping plover, a small shorebird that is identifiable by its black breast band and white eye ring. The bird is shown standing on a beach, with the waves crashing behind it. 
 
 

 
 
   
 
   
      Human Annotation:   A building on the street has sighs saying Big Weener and a picture of a woman hugging a large sausage. The color of the building is light tan and the lettering is black. There is a parking sign in front of the building with an arrow pointing to the left. There are two yellow umbrellas out on the street with some seating. A car is traveling on the road. 
      BEST:   This image features the Viper Room, Wonder La, Grindhouse, and Whittier Village Cinemas. The Viper Room is a nightclub in West Hollywood, California. Wonder La is an amusement park in La Mirada, California. Grindhouse is a movie theater in Whittier, California. The Whittier Village Cinemas are a movie theater in Whittier, California. The Miller Big is a movie theater in Whittier, California. 
 
      Socratic Model:   People enjoying a meal at an outdoor restaurant. 
 
      BLIP:   A car is parked in front of a building 
 
      BEST with only tags:   This image features the Viper Room in Wonder La, Grindhouse, and the Whittier Village Cinemas. The Miller Big sign is also prominently featured. 
 
 

 
 
   
 
   
      Human Annotation:   The photo is on a boat or ship. A child is eating at a table. The table is blue and square and have speckles of black in it. The child is white and has partially curly blond hair. He is wearing a blue shirt with red sleeves and a white bracelet. The plate is a white square with an orange boarder. There are two men sitting behind the boy. The ocean is visible from the window.  
      BEST:   This image features a young boy sitting at a table and eating a slice of pizza. The table has white caribbean cruise, or independence of the seas reviews, or baby cruising love, or pizza passion written on it. The boy has a slice of pepperoni pizza in front of him and is eating it with gusto. There is a green pepper on the plate next to the pizza and a white napkin in the boy's lap. 
 
      Socratic Model:   This looks like the perfect place to enjoy a delicious pizza. 
 
      BLIP:   A little boy sitting at a table eating a slice of pizza 
 
      BEST with only tags:   This image is a snapshot of a family enjoying pizza on a caribbean cruise. They look to be having a great time, and the ship in the background looks to be the Independence of the Seas. 
 
 

 
 
   
 
   
      Human Annotation:   A little girl with blond hair is standing on a tennis court. It is a sunny day, and there are shadows cast on the ground. The girl is wearing a white short-sleeved shirt, a white skirt, and white socks. She has white and pink shoes on. There is a green tennis ball in mid-air, and she is holding a tennis racket behind her. There is a small orange cone by her feet, and a net in the background.  
      BEST:   This photograph shows a young girl at the Bollettieri Tennis Academy in Florida, practicing her backhand. She is wearing a white racquet and her blond hair is blowing in the breeze. The green of the tennis court and the blue of the sky are both very clear in the photograph. 
 
      Socratic Model:   No one is better than tennis pro. 
 
      BLIP:   A little girl holding a tennis racquet on a tennis court 
 
      BEST with only tags:   This image features a young girl practicing her tennis skills at the Bollettieri Tennis Academy. She is using a tennis drill to improve her footwork, and is playing with focus and concentration. Nicole Conard is a junior tennis player who has trained at the Bollettieri Tennis Academy, and she provides inspiration for other aspiring athletes. 
 
 

 
 
   
 
   
      Human Annotation:   This is a toy shop. The shop has lots of stuffed animals. The stuffed animals are bears. There are many teddy bears in the window display. The bears are various different colors. The window is framed white. The letters on the window are red with a white and blue border on them. The bear in the front of the window has a red scarf on it. 
      BEST:   This image is of a shop window filled with stuffed animals. There are many different types of teddy bears in the window, as well as other animals. Some of the bears are antique, and some have a cobrastyle. 
 
      Socratic Model:   The shopfront of a toyshop or gift shop, with brightly wrapped presents in the window. 
 
      BLIP:   A teddy bear shop window filled with lots of stuffed animals 
 
      BEST with only tags:   This image features the Vermont Teddy Bear Company, which is a manufacturer of antique bears. The company has a museum located in its headquarters in Shelburne, Vermont, which features teddy bears from all around the world. The museum has a cobrastyle design, with dark wood paneling and red curtains. 
 
 

 
 
   
 
   
      Human Annotation:   A red and white stop sign is mounted on a yellow pole on sidewalk.  Under the stop sign is a triangular "caution" traffic sign.  A bicycle is parked behind the yellow pole of the stop sign.  A white wall building with a red roof is directly behind the stop sign as well.  Three human silhouettes and the silhouette of a shopping cart are on the triangular caution sign. 
      BEST:   This image features a red stop sign on a yellow pole. The stop sign is decorated with stickers, and stands in front of a building. 
 
      Socratic Model:   A busy intersection with a zebra crossing and a supermarket in the background. 
 
      BLIP:   A red stop sign sitting on top of a yellow pole 
 
      BEST with only tags:   This image is of a stop sign. It is red with white lettering and has an octagonal shape. The sign is warning people to stop, as there is a shark in the water nearby. This image is meant to be humorous and to warn people of the dangers of public sharking. 
 
 

 
 
   
 
   
      Human Annotation:   A pole holds a red sign on it. There are cars lining the street. There is a black fence behind the sign. There are white clouds in the sky. 
      BEST:   This image is of a stop sign with the word "park" written in a provocative style. There is also a blue and gray plane in the sky and a red truck parked on the street. 
 
      Socratic Model:   A colorful display of parking signs and graffiti. 
 
      BLIP:   A red stop sign sitting on the side of a road 
 
      BEST with only tags:   This image is of a yellow sign with a black arrow pointing in the direction of traffic. The text on the sign reads "Placa Mae" in black lettering. There is also a smaller sign below it that reads "ipe roxo" in black lettering. 
 
 

 
 
   
 
   
      Human Annotation:   A rusting, old, out-of-order fire hydrant is in an overgrown field of weeds. The hydrant is missing one of it's covers and the pipe is open. The weeds are short and low to the ground. A tree branch is hanging over the fire hydrant. 
      BEST:   This image features a green fire hydrant in the middle of a wooded area. The hydrant is surrounded by leaves and is likely quite old, as there are no modern features about it. It is a moderate-sized object in the image. 
 
      Socratic Model:   This image shows a beautiful forest with a water tap, perfect for a refreshing drink of water. 
 
      BLIP:   A green fire hydrant sitting in the middle of a forest 
 
      BEST with only tags:   This image is of a fire hydrant in a yard. The hydrant is made of metal and is green in color. It has a large spout that is used to put out fires. The hydrant also has a large handle that is used to turn it on and off. 
 
 

 
 
   
 
   
      Human Annotation:   a train is waiting on  track. the train is very bright and is yellow in color. there is a smaller train next to it. a man is riding on the smaller train. the small train is red and black. it has its own set of tracks. 
      BEST:   This image shows a couple of people standing next to a train. The train is yellow and appears to be a diesel shunter or bemo. 
 
      Socratic Model:   This is a photo of an electric locomotive at a train station. 
 
      BLIP:   A couple of people standing next to a train 
 
      BEST with only tags:   This image is of a yellow freight train being shunted by a diesel-powered shunter. The freight consists of several bemo wagons, and there is also a trenerke in the image. The image was taken in a railway yard, and the surrounding buildings can be seen in the background. 
 
 

 
 
   
 
   
      Human Annotation:   There are fruits and vegetables on display at a market. The bananas at the market are yellow and ready to eat. There is also some oranges in the near distance. There are potatoes and all kinds of vegetables at the market. There are no people in the picture. Some of the bananas have stickers on them. 
      BEST:   This image features a variety of fruits and vegetables for sale at a market. There are bunches of bananas, lemons, and broccoli on display, as well as other produce. The image is taken from a close up perspective, highlighting the individual fruits and vegetables. 
 
      Socratic Model:   A market day bounty of fresh greens and vegetables. 
 
      BLIP:   A variety of fruits and vegetables for sale at a market 
 
      BEST with only tags:   This image shows a market filled with fresh fruits and vegetables. There is a large variety of produce on offer, with everything from apples to zucchini. The market is located on Granville Island in Vancouver, and is a popular spot for locals and tourists alike. 
 
 

 
 
   
 
   
      Human Annotation:   The marsh is surrounded with greenery. There are bushes at the top of the ditch however near the water there is compacted sand with patches of grass. There are spots of rocks jutting out of the water. There are black elephants drinking in the water. Some of them are larger than others and some appear to be babies. There is one man sitting on a rock in the water. He is wearing an orange shirt and a hat.  
      BEST:   This image shows a herd of elephants at Pinnawala Elephant Orphanage in Sri Lanka. The elephants are bathing in the river and playing together. There is a small calf among the herd, and an older elephant is standing apart from the others. 
 
      Socratic Model:   A beautiful sight of an elephant at a watering hole. 
 
      BLIP:   A herd of elephants walking across a river 
 
      BEST with only tags:   This image features the Pinnawala Elephant Orphanage, a sanctuary for wild elephants located in Kerala, India. The orphanage was founded in 1975 and currently cares for over 80 elephants. The image shows a group of elephants bathing in the river near the orphanage. 
 
 

 
 
   
 
   
      Human Annotation:   A large light wooden table is the center point of this small room. In the middle of the very large table is a small potted plant sitting in the sun from the window. There are various metal shelves filled with bottles and containers on one wall. Against another wall is a bright yellow, metal double doored closet, and a small grey filing cabinet. 
      BEST:   This image is of a lab bench in an open lab. There are various scientific equipment and tools on the bench, as well as a few plants. In the background, there is another lab bench and a desk. 
 
      Socratic Model:   A lab bench with tools and equipment. 
 
      BLIP:   A kitchen with a wooden table and a yellow refrigerator 
 
      BEST with only tags:   This is an image of a lab bench with various equipment and tools on it. There are several open labs in the background. 
 
 

 
 
   
 
   
      Human Annotation:   There is a red light on a pole hanging over the street. There are buildings lining the street. There are cars driving on the street. There is a light post next to the street. 
      BEST:   This image features a red traffic light over a city street. The light is shining brightly, and casts a red glow over the surrounding area. The street is filled with cars, and there are buildings on either side. The sky is cloudy, and it appears to be sunset. 
 
      Socratic Model:   The downtown skyline illuminated by a stoplight at four o'clock. 
 
      BLIP:   A red traffic light over a city street 
 
      BEST with only tags:   This image is of a street in Bolton Hill, Baltimore, MD, with a beautiful sunset in the background. The weather in Boston and Washington, DC, is also shown, with a clear sky in both cities. The film Vanilla Sky is also referenced in the title. 
 
 

 
 
   
 
   
      Human Annotation:   An image of a peeled large banana dominates the picture. Three men are walking down the street.  The man in the front is by himself while two other men are in close proximity.  Two buses are parked along the side of the street. 
      BEST:   This image features a close up of a banana that is being peeled by a person. The banana is on a table in front of a loofa, or stick of butter, or tissue. The background is blurry and there is a red bus driving down a street in the background. 
 
      Socratic Model:   A banana a day keeps the doctor away! 
 
      BLIP:   A person holding a peeled banana in their hand 
 
      BEST with only tags:   This image is of a banana that has been peeled and then rolled up into a "cup." The banana cup can be filled with other fruits or yogurt, or eaten plain. This image is from Harry Banana, a website about all things banana. 
 
 

 
 
   
 
   
      Human Annotation:   A surfer is wearing a black wet suit. He is standing on top of a white surfboard. There are large waves in the water behind the man. The sky is blue.  
      BEST:   This image shows a man riding a wave on top of a surfboard. The surfer is in a black wet suit and is at the middle of the image. The wave is large and the surfer is in the cutback position. 
 
      Socratic Model:   D surfing the perfect wave. 
 
      BLIP:   A man riding a wave on top of a surfboard 
 
      BEST with only tags:   This image is of a surfer cutting back on a wave. The wave is tall and curling, and the surfer is cutting back sharply to catch it. He is surrounded by white foam, and the wave is crashing behind him. 
 
 

 
 
   
 
   
      Human Annotation:   A black cow is standing right against the wooden fence. The cow's eyes are dark brown and the cow's hair is wavy. The cows ear is tagged. Behind the black cow stands a brown cow. Their area is fenced off by wood and metal. The area is thick with rich grass.  
      BEST:   This image features a black cow standing next to a wooden fence. The black cow is large in the image, and the brown cow is smaller. The cows are both North Devon cattle. 
 
      Socratic Model:   A beautiful pastoral scene, perfect for any beef lover. 
 
      BLIP:   A black cow standing next to a wooden fence 
 
      BEST with only tags:   This image is of a black cow, south devon cattle, and dexter calves. The south devon cattle are a British breed of cattle that are known for their dark red coloring and ability to produce high-quality beef. The Dexter calves are a smaller British breed of cattle that are known for their black coloring. 
 
 

 
 
   
 
   
      Human Annotation:   The vanity in this fancy, large bathroom is very long and is made of medium stained wood. The lighting above the vanity are three hanging, glass covered globes. The counter of the vanity has a sink as well as a vase filled with purple flowers. The walls are white and the tiles are all made of stone. The shower is also tiled with stone like tiles and is very large and open. 
      BEST:   In this image, we see a master bath with custom showers and a bath remodel. The shower features aqualisa showers, and the bathroom remodeling ideas are on full display with the stylish copper-plated sink and tumbler. 
 
      Socratic Model:   A photo of an indoor shower or jacuzzi. 
 
      BLIP:   A bathroom with a walk in shower next to a sink 
 
      BEST with only tags:   This image shows a custom shower in a master bath. The shower features an aqualisa shower system, which provides a high quality, luxurious shower experience. The bathroom remodeling ideas shown here can help you create a beautiful and functional bathroom that meets your needs. 
 
 

 
 
   
 
   
      Human Annotation:   A cart sits with two boxes on top of it. There are other boxes nearby. There is a large straw basket. There are other baskets on top of it. There are wheels under the cart. There is a set of stairs that are made out of wood. There is a yellow wall to the right of the cart. The ground under the cart is gray. There are round straw baskets behind the cart. The wheels on the cart are black.


 
      BEST:   This image shows a variety of different types of baskets, most of which are made out of wicker. The baskets range in size from small to large, and some are even stacked on top of each other. There is a black trunk in the upper left corner of the image, and a suitcase in the upper right corner. 
 
      Socratic Model:   An eclectic mix of old and new. 
 
      BLIP:   A room filled with lots of different types of baskets 
 
      BEST with only tags:   This image features a number of antique trunks, including a steamer trunk and a wicker casket. These trunks are all in various states of disrepair, with some showing more wear and tear than others. The image gives an interesting glimpse into the past, when people would use these trunks to store their belongings. 
 
 

 
 
   
 
   
      Human Annotation:   There is a building in the photo. The building is made of red old brick. There are twelve rectangular window in the building. The windows that are at the bottom of the building are covered with wooden boards. They are also larger than the window above them. There is a tan door on the right with a small mail slot in the middle. There is also a parking meter on the curb in front of the building.  
      BEST:   This image is of the Grant High School in Portland, Oregon. The brick panels on the old brewery mission and the brickwall of the empty wall are visible in the image. 
 
      Socratic Model:   Several people in front of a building with a masonry facade. 
 
      BLIP:   A brick building with a parking meter in front of it 
 
      BEST with only tags:   This image features an old brick wall with several panels missing, exposing the inner mortar and brick. The wall is located in front of Grant High School in Portland, Oregon and is part of an abandoned brewery mission. 
 
 

 
 
   
 
   
      Human Annotation:   There is a long train going down the track. The front half of the train is red. The last half of the train is white. There is a white building next to the train. On the other side is a parking lot that is empty. There are a few trees with green leaves in the parking lot. There are lines on the ground of the parking lot. The sky above is blue. There are no clouds. There are some mountains in the background. The mountains are brown and bare.  
      BEST:   This image is of a train in McCloud, CA. The train has a red trim or logo of a train on it. The train is also small in the image. There is a winshield of the train and the passenger train is in the middle of the image. The train is also in Burney, CA. 
 
      Socratic Model:   Many commuters wait for their train at the station. 
 
      BLIP:   A train traveling down train tracks next to a parking lot 
 
      BEST with only tags:   This image is of the McCloud CA area. In the foreground is the Napa Valley Wine Train, and in the background are the Portola Railroad Museum and Western Pacific Railroad Museum. Burney, CA can also be seen in the background. 
 
 

 
 
   
 
   
      Human Annotation:   The stop sign on the corner has symbols on top of it. The symbols represent another language. There's someone crossing the street at the crosswalk. There is a blue truck driving down the street. There's a tree behind the person Crossing at the crosswalk. The street is Gray colored. There's a triangle sign underneath the stop sign that is blue. 
      BEST:   This image shows a stop sign directing traffic at the entrance to the demilitarized zone (DMZ) at Panmunjeom. The DMZ is a strip of land running across the Korean Peninsula that serves as a buffer zone between North and South Korea. At the center of the image is a small military uniform, likely worn by a soldier stationed at the DMZ. 
 
      Socratic Model:   A busy army base, with a zebra crossing and traffic lights to keep the soldiers safe. 
 
      BLIP:   A red stop sign sitting on the side of a road 
 
      BEST with only tags:   This image shows a man directing traffic in the Demilitarized Zone (DMZ) at Panmunjeom. The DMZ is a buffer zone between North and South Korea, and Panmunjeom is where the two countries have met for negotiations. This image captures the tension and importance of the DMZ. 
 
 

 
 
   
 
   
      Human Annotation:   a plane is flying in the sky. the plane is very white in color. there is a logo on the tail. the logo is in the shape of a leaf. 
      BEST:   This image features a large jetliner, possibly an Airbus A330 or A332, flying through a cloudy sky. The jetliner has the Air Canada logo on its tail, indicating that it is likely an Air Canada plane. 
 
      Socratic Model:   This photo shows an aircraft at an airport. 
 
      BLIP:   A large jetliner flying through a cloudy sky 
 
      BEST with only tags:   The photo shows an Air Canada Airbus A330-300, registration C-GFAJ, performing flight ACA-824 from Toronto Pearson International Airport, ON (CYYZ) to London Heathrow Airport, England (EGLL). The aircraft is seen here in the early stages of its takeoff roll on runway 24L. 
 
 

 
 
   
 
   
      Human Annotation:   A man in a white shirt and khaki ants is holding a large wooden surfboard. The man is standing in an open area in front of a wooden fence. The man has a beard and mustache and is wearing yellow and white bands on his wrist. The grass around the man is brown and dead. There are trees with green leaves beyond the wooden fence. 
      BEST:   This image shows a man holding a large wooden surfboard in his hands. The surfboard is made of wood and is a typical longboard shape. The man looks like he is about to go surfing, and he seems to be in a wooded area near the coast. 
 
      Socratic Model:   A photo of a raft or barndoor area with a surfboard. 
 
      BLIP:   A man holding a surfboard in his hands 
 
      BEST with only tags:   This image shows a wood canoe with plans for it, as well as wooden surfboards and a koastal longboard. It also shows a teak surfing board. 
 
 

 
 
   
 
   
      Human Annotation:   There is a large black garbage can sitting on the sidewalk. There is a black pole next to the garbage can. There is a bench on the sidewalk in front of the trash can. There is a black railing on the side of the sidewalk. There are people walking on the sidewalk. There is water behind the railing. There are trees on the sidewalk. 
      BEST:   This image shows a view of the Liffey River in Dublin, Ireland. In the foreground is an empty trash bin, and in the background is a view of the Cardiff Bay area. The bench in the foreground casts a shadow on the ground next to it. 
 
      Socratic Model:   A photo of a Dubliner at a landfill. 
 
      BLIP:   A black mail box sitting on the side of a road 
 
      BEST with only tags:   This photograph features an empty bin in Cork City beside the River Liffey. In the background, Cardiff Bay can be seen. This image serves as a reminder to not litter and to dispose of waste properly. 
 
 

 
 
   
 
   
      Human Annotation:   A man wearing a yellow sweater with a blue portion at the bottom. He has on a pair of jeans and a black pair of shoes. His is skateboarding on a black skateboard with lime green wheels. He kneeling with one hand on the ground and one extended next to his face. There are trees next to the concrete that he is skating on.  
      BEST:   This image is of a young man riding a skateboard down a hill. He is carving the snow with smooth, efficient movements, and his hat is blowing off in the wind. The skateboard looks fast and agile, and the background is a blurry mess of snow and trees. 
 
      Socratic Model:   Downhill skateboarding at its finest! 
 
      BLIP:   A young man riding a skateboard down a hill 
 
      BEST with only tags:   This image shows a person snowboarding or longboarding down a hill. They are carving and powersliding their way down, and appear to be having a lot of fun. The Chinook snowskate from Landyachtz can be seen in the background, proving that this image is from a winter scene. 
 
 

 
 
   
 
   
      Human Annotation:   The sky is mostly cloudy. There is no train in the station. There are people walking on the left platform. There is a yellow line going down the platform walkway. There are three people on the platform altogether. It is daytime outside. The platform is an outside platform. The person closest to the camera walking is wearing black. 
      BEST:   This image is of a man standing on a train track at Hodogaya Station. The Keikyu Line and JR Yamanote Line intersect at this station, as does the Tokyo Metro Toei Asakusa Line. 
 
      Socratic Model:   This image shows a busy platform train station. 
 
      BLIP:   A man is standing on a train track 
 
      BEST with only tags:   This image is of the Hodogaya Station on the Keikyu Line and JR Yamanote Line in Tokyo, Japan. The station is seen in the foreground with the Yamanote Line tracks running parallel to it. In the background, the Tokyo Metro and Toei Asakusa Lines can be seen. 
 
 

 
 
   
 
   
      Human Annotation:   It appears to be perfect weather on this day. Wall st. seems rather calm as there is no reflection of people on the buildings and the street overall doesn't seem like it's a busy one at the time. 
      BEST:   This image captures a street sign on a pole in front of a building. The sign is for Wall Street, which is the street in New York City that is home to the stock exchange. The image captures the hustle and bustle of Wall Street, with people and cars rushing by in the background. 
 
      Socratic Model:   A creative short caption I can generate to describe this image is: 'A photo of a street sign, projection, bank, agent, factor, broker, Fleet Street, signal, signaling, sign, signboard, sign, marker, depository, deposit, depositary, repository, sign.' 
 
      BLIP:   A street sign on a pole in front of a building 
 
      BEST with only tags:   This image features a street sign for Wall Street in New York City. The street is home to the New York Stock Exchange, and is often associated with wealth and finance. The money never sleeps on Wall Street, and the stock exchange is a center for trading stocks and other securities. 
 
 

 
 
   
 
   
      Human Annotation:   A wooden table with place mats on top of it. There are many bowls on top of the table with food in it. There is a Styrofoam tray that has food in it. There are many stacked plates and bowls on the table and a ladle on top of the stack of plates.  
      BEST:   This image shows a wooden table with several bowls of food on it. The bowls contain a variety of different dishes, including beef and broccoli, chinese food, and a stir-fry. The food appears to be ready to eat, making this an image of a dinner or banquet meal. 
 
      Socratic Model:   A delicious Chinese meal enjoyed by three people. 
 
      BLIP:   A wooden table topped with bowls of food 
 
      BEST with only tags:   This is a photo of a beef and broccoli dish, which is a Chinese food. The dish looks to be ready to eat, and likely would make for a filling dinner or banquet meal. The beef is cooked in a brown sauce and is paired with broccoli florets, making for a healthy and tasty meal. 
 
 

 
 
   
 
   
      Human Annotation:   Old train car with red and yellow color is on the tracks The  train car is rusted,not moving has wire on top of the roof, the Windows to the train cart is covered with dust.There are power line wires above the cart.The side of the track  to the train car is cracked Also the headlights are all rusted. 
      BEST:   This image is of a locomotive, numbered E612, belonging to the Czech Railways (CFR), and photographed in Croatia. The locomotive is painted red with white trim, and is pictured in the middle of the image. It is a moderate-sized locomotive in the image. 
 
      Socratic Model:   This photo shows a diesel-electric locomotive at a railway station. 
 
      BLIP:   A red train traveling down train tracks next to a train station 
 
      BEST with only tags:   This image is a photo of a CFR locomotive numbered 791051cz and numbered E612. The locomotive is pictured at a train station in the Czech Republic. 
 
 

 
 
   
 
   
      Human Annotation:   A person is sitting on a brown bench in a park. The person wears a grey sweatshirt and he face right. A person with a towel on the head is riding a bike. Many people stand on front a body of blue water, some people are walking. Many dead yellow leaves are next to the path made of bricks. There is a row of trees on front the water.


  
      BEST:   This image features a woman riding a horse on Kitsilano Beach in Vancouver. At the center of the image is a small person sitting on a bench. There is also a brown car at the right of the image and an orange balloon at the left. In the background, there is a view of Geneva, Switzerland. 
 
      Socratic Model:   A woman enjoying a sunny day rollerblading in a park. 
 
      BLIP:   A man riding a bike down a sidewalk next to a park 
 
      BEST with only tags:   This image is of Geneva, Switzerland. The city is situated on the shores of Lake Geneva and is surrounded by the Alps. The image shows a view of the city from the waterfront, with the Alps in the background. In the foreground is Kitsilano Beach, with people enjoying a day at the beach. 
 
 

 
 
   
 
   
      Human Annotation:   A flip phone is laying on a table top. There is a small little bear attached to it. The flip phone is open and the time on the phone says 12:42.  
      BEST:   This image is of a pink furry phone charm with a small Sony Ericsson k610i and a large Sony Ericsson k550i cellphone. There is also a small pink bear on a shelf to the right of the image. 
 
      Socratic Model:   A phone call in progress in an office or playroom. 
 
      BLIP:   A pink teddy bear sitting next to a cell phone 
 
      BEST with only tags:   This image features a pink furry phone charm on an env3 cell phone. The phone is a Sony Ericsson k610i, and the charm is a Sony Ericsson k550i. 
 
 

 
 
   
 
   
      Human Annotation:   The boat is reflecting in the water. The boat is also in fast motion on the water. There are two people on the boat enjoying the view. The woman on the boat is wearing sunglasses. The man on the boat to the left is wearing a yellow life preserver. The boat is creating small white waves behind the boat. 
      BEST:   This image is of a crestliner boat, alumacraft, alumacraft boat, alumaweld, and boston whaler sport. In the image, the crestliner boat is in the foreground and is a moderate-sized boat. The alumacraft boat is in the middle of the image and is a small boat. The alumaweld is to the right of the image and is a small boat. 
 
      Socratic Model:   A photo of a river with a motorboat in it. 
 
      BLIP:   A couple of people riding on the back of a boat 
 
      BEST with only tags:   This image showcases three different types of boats - a Crestliner, an Alumacraft, and an Alumaweld. The Crestliner is a sleek and modern boat with a pointed bow and stylish design. The Alumacraft is a more traditional boat, with a squared-off bow and simple lines. The Alumaweld is the most utilitarian of the three, with a boxy design and no frills. 
 
 

 
 
   
 
   
      Human Annotation:   Two stuffed animals and an empty liquor bottle sit on a light colored sheet on a bed. One yellow stuffed animal is a Pokemon character, and the top of the bottle, which is closed, is at it's mouth. The other stuffed animal was a knitted green and gray monkey. The monkey appears to have a cigarette in the right corner of it's mouth. 
      BEST:   In this image, there is a stuffed monkey next to a banana. Next to the monkey is a bottle of alcohol, most likely whiskey. The bottle is filled with liquor and is sitting on a bed. There is also a stuffed animal next to the bottle, most likely a monkey or a pikachu doll. This image is about drunknmunky, pokedoll, putinka, and pikachu doll. 
 
      Socratic Model:   Several people enjoying alcoholic drinks at a toy shop. 
 
      BLIP:   A stuffed animal next to a bottle on a bed 
 
      BEST with only tags:   This image is of a drunknmunky plush toy with a putinka (a Russian vodka) bottle in its hand. It is also wearing a Pikachu doll around its neck. 
 
 

 
 
   
 
   
      Human Annotation:   A small, thick piece of cooked steak sits on a white ceramic plate that is shaped like a square. It is dark brown and the top is blackened from cooking. There are two carrots lying beside it with leaves still attached to their tops. One of the carrots is small and the other is longer than the steak.  On a table nearby, a cut piece of bread is on a greenish yellow napkin and there is a butter knife beside it. 
      BEST:   This image shows a white plate with a piece of pan-seared beef steak and some carrots on it. The beef is a nice, dark brown color and looks juicy and delicious. The carrots are orange and look fresh and healthy. This image is a great example of a simple, yet satisfying meal. 
 
      Socratic Model:   A delicious looking steak au poivre! 
 
      BLIP:   A white plate topped with meat and carrots 
 
      BEST with only tags:   This image shows a pan-seared beef ribeye steak. The steak is a thick cut, and has been seared on both sides to create a crispy crust. It is served with a side of roasted vegetables. 
 
 

 
 
   
 
   
      Human Annotation:   A man and woman are standing beside each other on a train platform. The woman is wearing a coat, scarf and boots. She is holding a handle to a suitcase that has a plastic bag hanging from it. The man is wearing a coat, scarf and pants. He is leaning on a suitcase that is front of him. Other people are standing around the man and woman with their luggage also. A red cart is parked behind the people near the train. 
      BEST:   This image shows a man in a blue jacket at a train station. There is a large man in the background, and a woman with a suitcase in the foreground. The woman has a plaid coat on, and the man has a beanie on. There is luggage under the bag, and the fender over the tire is visible. 
 
      Socratic Model:   Two people at a train station, one holding a suitcase. 
 
      BLIP:   A group of people standing next to a train 
 
      BEST with only tags:   This image is of a train station in Rome, called Termini. In the foreground, there are several people waiting on the platform, and in the background there are several trains parked in the station. This image is from Trenitalia, the Italian train company, and shows their high-speed train, Frecciargento. 
 
 

 
 
   
 
   
      Human Annotation:   A blond little girl sitting om a blue counter having a snack and a drink in a orange sippy cup . 
      BEST:   This image is of a little girl sitting on a counter while she enjoys a plate of bananas. The counter has a white toaster on it and the toaster has a white lid. The little girl is wearing a green shirt and has blonde hair. 
 
      Socratic Model:   A granddaughter eating an apple at a kitchen table. 
 
      BLIP:   A little girl sitting on a counter with a plate of bananas 
 
      BEST with only tags:   This image shows a toddler sitting at a counter in a kitchen, with a plate of food in front of her. The food appears to be some kind of sandwich or wrap, and the toddler looks very hungry. 
 
 

 
 
   
 
   
      Human Annotation:   A white toilet sits next to a white wall. There is a white sink on the wall. The tile on the floor is black and white.  
      BEST:   This is a photograph of a public bathroom. It features a toilet seat at the lower right of the image and a small sink at the left. Both are white in color. The toilet seat is raised and is of moderate size in the image. The sink is small and has a single basin. 
 
      Socratic Model:   An empty room with a toilet and sink. 
 
      BLIP:   A bathroom with a toilet and a sink 
 
      BEST with only tags:   This image is of a public restroom with commercial toilets. The restroom is ADA compliant, with a wheelchair accessible lavatory. The walls are tiled in white, and the floors are tiled in black. There is a sink and a toilet in each stall, as well as a hand dryer. The hand dryer is white, with a black button to activate it. There is also a trash can in each stall. 
 
 

 
 
   
 
   
      Human Annotation:   A blurry photograph shows a red fire hydrant with a white top and knob, set into a small brick walkway. It is nighttime, and behind the fire hydrant are two buildings, one with lights shining  from the windows. A tree with bare branches is in front of the second building. There is a small row of green shrubs near the tree. 
      BEST:   This image is of a freeze proof hydrant. The top of the hydrant is at the lower middle of the image and is moderate-sized in the image. The hydrant is fuzzy or blurry and is at the right of the image. The blurriness is most likely due to the low light conditions present in the scene. There is also a red beacon on top of the hydrant. 
 
      Socratic Model:   A water faucet in front of a fire station. 
 
      BLIP:   A red and silver fire hydrant sitting on the side of a road 
 
      BEST with only tags:   This image is of a freeze proof hydrant. The Mueller hydrant is red and has a beacon on top that flashes when it is in use. This particular hydrant is in front of the Santa signal in the town square. 
 
 

 
 
   
 
   
      Human Annotation:   A large black stand stands on a chair next to a table. On the table is a pizza covered in cheese and sauce. The pizza is sitting on top of a pizza box. The black dog is wearing a brown collar. There is a wooden cabinet to the right of the dog. There is a bottle of coke on the counter behind the dog. There is a table next to the cabinet that is near the dog.  
      BEST:   This image is a close up of a black dog standing in front of a pizza. The pizza is a large, cheese pizza with red sauce. 
 
      Socratic Model:   A yummy sausage pizza from a local pizzeria. 
 
      BLIP:   A black dog standing in front of a pizza 
 
      BEST with only tags:   This image is a picture of a Gotti bloodline dog, eating a slice of pizza from Pizza Hut. The dog is a Bandog, which is a cross between a Mastiff and an American Pit Bull Terrier. The pizza is quite large, compared to the dog. 
 
 

 
 
   
 
   
      Human Annotation:   It is a cloudy day and there is a large open field. A red and white single engine airplane sits on the field, but it's propeller is spinning. Behind it, are six people, two are probably adults and the rest are children. One adult and child have their arms extended while they face the plane. Three children are huddled together, while the final person stand a bit away from the others. In the background are trees and then rolling hills that fade into the distance. 
      BEST:   This image features a small aircraft in the foreground with people playing frisbee in the background. The aircraft is a wilga, pilatus porter, helio courier, or quest kodiak. The people are mostly in the background and are small in the image. 
 
      Socratic Model:   An amphibious aircraft at an outdoor hangar. 
 
      BLIP:   A small red and white plane sitting on top of a lush green field 
 
      BEST with only tags:   This image is of a Wilga aircraft. It is a small, two-seater propeller plane that is used for training, sport flying, and air taxi services. The Wilga is made in Poland and has been in production since 1978. This image also shows a Pilatus Porter aircraft. The Pilatus Porter is a small, lightweight cargo and passenger plane that is used for short-haul flights. It is made in Switzerland and has been in production since 1957. 
 
 

 
 
   
 
   
      Human Annotation:   Eight planes are flying in the sky above a mountain range.  The planes are in a circle flying in different directions. The wings and tails of the planes are all visible. The mountain range has many hills and clouds cover them in the distance.    The sky is very cloudy and bits of the sun are coming through the cloudy sky.
 
      BEST:   This image features a group of Pilatus airplanes flying over a mountain range. The Pilatus PC-12s are all white with red trim, and the Canadian Snowbirds are flying in formation in the back. There is also a sailplane flying in the sky and a Swiss Air jet in the distance. 
 
      Socratic Model:   People gather around an airplane at an airport. 
 
      BLIP:   A group of airplanes flying over a mountain range 
 
      BEST with only tags:   This image features a Pilatus aircraft, a Swiss sailplane, and the Canadian Snowbirds. The Pilatus aircraft is a popular civilian and military aircraft, while the sailplane is a type of glider. The Canadian Snowbirds are a squadron of jet-powered acrobatic aircraft. 
 
 

 
 
   
 
   
      Human Annotation:   A large splash is in front of a wave in the water. There is a large white and black surf board in the water. There is a black dog that is riding on top of the surf board. 
      BEST:   This image features a black surfboard cutting back through the waves. A man in a black wetsuit is body boarding off the surfboard. The surf is moderate sized and there is a lot of white water. 
 
      Socratic Model:   A surfer prepares to catch a waves at their local beach. 
 
      BLIP:   A man riding a surfboard on top of a wave 
 
      BEST with only tags:   This image captures a surfer in the midst of a cutback maneuver. The wave is tall and curling, and the surfer is crouched low, using his surfboard to gain as much speed as possible. The surfer is Chris Ward, and the photo was taken by 45surf. 
 
 

 
 
   
 
   
      Human Annotation:   The image is of a baseball player on the field.  He is holding a black bat in a pose that shows he is getting read to hit a ball.  His uniform is white with a navy belt.  Navy lettering can be found on the back of his uniform.  You can make out two letters B and R.  Navy numbers are also on the back of his uniform.  You can make out the number two. 
      BEST:   This image features Mike Zunino of the Tampa Bay Rays in a batting stance. Zunino is at the upper middle of the image and is moderate-sized. He appears to be leaning slightly forward, with his weight shifted onto his back foot. His bat is held high and close to his body, with his hands in a traditional grip. 
 
      Socratic Model:   A figureless photo of a baseball player in mid-air. 
 
      BLIP:   A baseball player holding a bat on top of a field 
 
      BEST with only tags:   This image is of a baseball hitter in a batting stance. The hitter is Mike Zunino of the Tampa Bay Rays. Zunino is a solo hitter, meaning he typically bats in the number one spot in the lineup. Zunino's batting stance is slightly open, with his hands held high and his weight on his back foot. He appears to be ready to swing at the ball. 
 
 

 
 
   
 
   
      Human Annotation:   A large white bottom boat has an orange cover with small white framed windows. It is sitting in a very blue sea. There are black numbers on top of an orange cover. One person wearing a blue shirt is hanging out a window. 
      BEST:   The orange lifeboat is in the center of the image and is moderately-sized. The man boarding is at the lower left of the image and is small. The U.S. Coast Guard Hittron is visible in the background. 
 
      Socratic Model:   A photo of a lifeboat on a ship. 
 
      BLIP:   A boat with people on it in the water 
 
      BEST with only tags:   This image features a USCG Hitron lifeboat, seen here rescuing passengers from a sinking ship. The Hitron is equipped with a liferaft, and can be used to transport passengers to safety. The Hottug is also visible in the background, providing additional rescue capacity. 
 
 

 
 
   
 
   
      Human Annotation:   A blender is shown in the kitchen. The blender is black and unplugged. There is some blue soap sitting on the silver sink. The door to the left is closed unlocked. 
      BEST:   This image shows a blender on top of a kitchen counter. It is a gas blender and is made by Osterizer. It is also called the Nutrininja blender or the ninja blender. It is a liquidiser. 
 
      Socratic Model:   This is a photo of a blender, liquidizer, liquidiser, food processor, smoothie, cocktail shaker, kitchen appliance, shaker, home appliance, household appliance, mixer, coffee mill, coffee grinder, grinder. 
 
      BLIP:   A blender sitting on top of a kitchen counter 
 
      BEST with only tags:   This image features a gas-powered osterizer blender. The osterizer is a powerful blender that can be used to blend Nutrininja smoothies. The Ninja blender is also a powerful blender that can be used to create liquidiser smoothies. 
 
 

 
 
   
 
   
      Human Annotation:   a dog is looking in the mirror. the dog is a poodle. the dog is tan in color. the dog has a black colored nose. 
      BEST:   This image is of a spoodle (a cockapoodle cross), a furry dog with a curly tail. In the background is a mirror, and through the mirror we can see a second dog - presumably the spoodle's reflection. The spoodle is standing in front of a doggy door, looking as if it's about to go outside. 
 
      Socratic Model:   A poodle contemplates its reflection in a mirror. 
 
      BLIP:   A dog looking at its reflection in a mirror 
 
      BEST with only tags:   This image features a spoodle (a crossbreed of a spaniel and a poodle) looking through a dog door at a mirror, which reflects its image. The dog is shown in profile, and its fur is a light buff color. It has a black nose and dark eyes, and its tail is wagging happily. 
 
 

 
 
   
 
   
      Human Annotation:   A plate is white and its shape is slightly rectangular. It is standing on a white surface that has some metal wires. The plate is filled with food. There is green chopped broccoli on the plate. Next to the broccoli is pasta with some pink smoked salmon chopped up into it. The pasta has a cream sauce on it. 
      BEST:   This image features a plate of broccoli pasta. The pasta is made from elbow macaroni, and the broccoli is cooked in creamette pasta sauce. The dish is garnished with frisee aux lardons, which is a type of bacon. 
 
      Socratic Model:   There's nothing like a warm and creamy bowl of carbonara to comfort you on a cold day. 
 
      BLIP:   A white plate topped with macaroni and broccoli 
 
      BEST with only tags:   This image is of a plate of broccoli pasta. The pasta is elbow macaroni, and it is covered in a creamy sauce made from cheese and milk. There are also pieces of ham or bacon mixed in with the broccoli. 
 
 

 
 
   
 
   
      Human Annotation:   This picture is taken outside at nighttime. Different people are walking on the road. A large colorful truck is parked on the side of the road in front of a large building. The buildings are illuminated with lights. Part of a blue sky can be seen on the side of one of the buildings. A red street light is hanging from a pole in front of the truck.  
      BEST:   This image shows a truck parked on the side of a street. The truck has graffiti painted on the side of it, and there is a large skateboard event van in the background. There is also a blurry picture of a person walking down the street in the lower right corner of the image. 
 
      Socratic Model:   A van downtown with a graffiti-covered moving truck parked in front of it. 
 
      BLIP:   A truck parked on the side of a street 
 
      BEST with only tags:   This image showcases a DKNYC storefront on a busy street in SoHo, Manhattan. A Revok graffiti mural is visible on the adjacent building. A line of vending trucks is parked on the street. 
 
 

 
 
   
 
   
      Human Annotation:   A motorcycle is parked at the curb. It has a sharp looking features. The motorcycle has two boxes attached to it. The first one placed behind the seat, it is medium and black. The second box is beside the wheel. It has silver color in front and the rest is black. The handles of the the motorcycle is black. It also have plastic shield in the front. 
      BEST:   This image is a photograph of a black motorcycle parked on the side of the road. The motorcycle is large in the image and appears to be a BMW R1200GS Adventure. The motorcycle is parked on the side of the road and there is a small black trunk or suitcase at the upper left corner of the image. 
 
      Socratic Model:   This image shows a motorcyclist at a picnic area. 
 
      BLIP:   A motorcycle parked on the side of the road 
 
      BEST with only tags:   This image is a photo of a BMW R1200GS Adventure. The bike is shown in profile, parked on a paved surface. It is a dark color, possibly black, and has several accessories installed, including a windshield, saddlebags, and side panels. 
 
 

 
 
   
 
   
      Human Annotation:   Two men are sitting in front of their laptops. Both of the laptops are black and gray. The man on the right has gray and black hair. The man on the right is wearing a watch on his right wrist. The watch is black. The man on the left is wearing a navy blue shirt. The american flag is stitched on the right shoulder of the dark blue shirt. 
      BEST:   This image shows two men looking at a laptop computer screen. The instructor has his laptop in the middle of the table and is looking at it with a student. The firefighter is sitting at a desk on the right side of the image and is using a laptop computer. 
 
      Socratic Model:   A detective and a technician work together in a computer room. 
 
      BLIP:   Two men looking at a laptop computer screen 
 
      BEST with only tags:   This image is of a man looking at a Toughbook tablet. The Toughbook tablet is a specialized computer that is designed for use in harsh environments, such as by emergency responders or the military. The man in the image may be looking at the Toughbook tablet to see what its capabilities are. 
 
 

 
 
   
 
   
      Human Annotation:   brown baby bears are walking in the grass. There is a large log above them next to two large rocks.  
      BEST:   This image is of a group of brown bears standing in a field. The bears are standing on a lush green field, and the grass on their backs is visible. The bear cubs are small in the image, and the black bear is sitting in the grass. 
 
      Socratic Model:   This image shows a black bear cub in a zoo. 
 
      BLIP:   A group of brown bears standing on top of a lush green field 
 
      BEST with only tags:   This image features a line-up of different types of bears. There are brown bears, black bears, and polar bears. In the foreground, there is a small bear cub walking on its hind legs. This image is meant to depict the diversity of bears and their habitats. 
 
 

 
 
   
 
   
      Human Annotation:   A woman is wearing a pink shirt. She is standing in the water. There is a wave behind the woman. She is holding a white surfboard.  
      BEST:   This image shows a woman in a pink shirt carrying a surfboard. The surfboard has a woman on it, and she is a moderate-sized figure in the image. This image could be used to describe female surfers, or bethany hamilton, us open of surfing, alana blanchard, bruna surfistinha, or any other female surfers. 
 
      Socratic Model:   This image shows the vastness and power of the ocean. It also shows the heroism of those who surf its waves. 
 
      BLIP:   A woman in a pink shirt carrying a surfboard 
 
      BEST with only tags:   This image is of Bethany Hamilton, a professional surfer. She is competing in the US Open of Surfing. Alana Blanchard and Bruna Surfistinha are also pictured, both professional surfers. The image captures the strength and athleticism of female surfers. 
 
 

 
 
   
 
   
      Human Annotation:   A large barn is surrounded by wooden and metal fences. In front of the barn is a paved street. The roof of the barn is grey and the walls are painted white. The doors are bright white. There are many pastures surrounding the barn. 
      BEST:   This image is of a cherry crest farm barn. The barn is red and has two large doors on the front. There are also several smaller doors and windows. The barn is surrounded by a brown fence with a riding gate. There are also several crib barns in the background. 
 
      Socratic Model:   A photo of a barn on a farm. 
 
      BLIP:   A red barn with a metal roof and a gate 
 
      BEST with only tags:   This image shows a horse barn and ranch gates at Cherry Crest Farm. The barn is a beautiful red color and the gates are made of sturdy wood. There are two crib barns in the background, which are also red. This image is peaceful and calming, providing a view of farm life that is idyllic and serene. 
 
 

 
 
   
 
   
      Human Annotation:   In this black-and-white image, a man is holding a cell phone to his right ear and looking straight ahead. He has very short, dark hair and has an East Asian appearance. He is standing next to a motorcycle outside a building. He appears to be wearing a robe. The appearance of him is reminiscent of a Buddhist monk. 
      BEST:   This image is of a monk in Lhasa, Tibet. He is talking on a cell phone and has a look of concentration on his face. The motorcycle parked beside him is interesting contrast to the traditional setting. 
 
      Socratic Model:   Tibetan monk using a phone booth at an outdoor bazaar. 
 
      BLIP:   A man talking on a cell phone next to a motorcycle 
 
      BEST with only tags:   This image features a black monk in the city of Lhasa, Tibet. He is wearing traditional Buddhist robes and is thought to be bulletproof, hence his nickname. The photo captures the essence of the monk's calm and peaceful demeanor, despite the bustle of the city around him. 
 
 

 
 
   
 
   
      Human Annotation:   The sidewalks are filled with people standing watching the parade go down the street. There are white barriers put up to keep the crowd of parade watchers at bay. Some people are holding up their cameras to take pictures. You can see trees with green leafs and buildings in the back of the people. 
      BEST:   They are both spectators watching the Harward Commencement parade. Many other people can be seen in the background, most of whom are wearing hats or umbrellas. 
 
      Socratic Model:   A group of people in academic costume marching in a procession. 
 
      BLIP:   A group of people walking down a street holding umbrellas 
 
      BEST with only tags:   This image is of a group of overlea orangemen wearing orange suits and marching in the harvard commencement parade. They are followed by a group of pigskin parade participants. 
 
 

 
 
   
 
   
      Human Annotation:   A boy is standing outside in the sunlight. He is holding an older, flip-style cell phone and is looking at the screen. The phone is grey in color. He is standing in the shade under a small tree to block the light from hitting the screen of the phone. The leaves of the tree are green with some brown spots on the leaves. The boy does not have a shirt on and has short brown hair. 
      BEST:   In this image, a young boy can be seen holding a cell phone in his hand. It is possible that he is using it to geocache, as the portable GPS feature is highlighted on the phone. The GPSMap 76S is also visible in the image, as well as the Geo Safari and Leapfrog Explorer. 
 
      Socratic Model:   A boy scout looks at a common European dogwood. 
 
      BLIP:   A young boy holding a cell phone in his hand 
 
      BEST with only tags:   This image features a handheld GPS device known as the GPSmap 76s. This device is used for geo caching, a recreational activity where participants use GPS devices to find hidden containers called caches. The GPSmap 76s is shown here being used in conjunction with the LeapFrog Explorer, a children's educational handheld device. 
 
 

 
 
   
 
   
      Human Annotation:   This image is of a wooden cutting board with various chopped vegetables laid out across it. Toward the top of the cutting board is a row of bright green broccoli florets. Below the broccoli is a row of a lighter green and white vegetable that looks like chopped celery, or perhaps leeks. Some of the celery is completely white. To the right of the image, there is a small pile of minced fresh garlic.  
      BEST:   This image is of a bunch of broccoli that has been cut up on a cutting board. The broccoli is in various states of wetness, from raw to lightly steamed. There is also some celery in the image, which provides a bit of color and contrast. 
 
      Socratic Model:   A zen garden with different greens and vegetables. 
 
      BLIP:   A bunch of broccoli cut up on a cutting board 
 
      BEST with only tags:   This image is of a broccoli floret. The broccoli has been cut into small, bite-sized pieces and is shown with a small amount of garlic. The broccoli is steamed, making it a healthy and easy-to-eat vegetable. 
 
 

 
 
   
 
   
      Human Annotation:   The picture has two frames. The first frame has two people in it. One man is wearing a gray shirt. he is holding a cup. On the second frame, the kitchen is empty. The fridge is white. Beside the fridge is a Pepsi vending machine. The counter top is blue. The cabinets are beige with brown boarders or line on them. 
      BEST:   This image shows a lunchroom or kitchenette with a panoramic view. The man taking the picture or the chubby man is at the left of the image and is small in the image. He is holding a controller and standing sideways. The guy leaning, or he's in black pants, or man leaning is at the lower left of the image and is small in the image. He is standing sideways. The sink is metallic and has legs. 
 
      Socratic Model:   This is a kitchen where people come to snack and relax. 
 
      BLIP:   A man standing in a kitchen next to a refrigerator 
 
      BEST with only tags:   This image shows a panoramic view of a kitchenette in a lunchroom or office space. The kitchenette includes a sink, stovetop, and refrigerator, as well as counter space and cabinetry. The image provides a view of the kitchenette from multiple angles, giving a comprehensive view of the space. 
 
 

 
 
   
 
   
      Human Annotation:   A large orange truck is parked next to the brick building. The word Allied is on the back of the truck behind the cab.  There is snow on the hood of the truck.  The ground is covered with snow and footprints.   A red and white stop sign is next to the driveway.  The trees have no leaves but do not have snow on them and the sky is clear and blue. 
      BEST:   This image shows a stop sign next to a truck that is parked in the snow. The truck is white and has a large logo on the side that says "Allied Moving. 
 
      Socratic Model:   This photo shows a busy delivery truck unloading packages at a residential driveway. 
 
      BLIP:   A truck is parked in the snow next to a stop sign 
 
      BEST with only tags:   This image is of an Allied moving truck. The truck is white and has the Allied logo on the side. The truck is parked in front of a house and there are people loading boxes into the truck. 
 
 

 
 
   
 
   
      Human Annotation:   Two cats are looking towards a mutual direction. One cat is black and white and the other cat is brown. They are standing on top of some furniture next to a wall. 
      BEST:   In this image, there is an orange tabby cat on the right, a black and white tuxedo cat in the middle, and a striped couch in the background. The orange tabby is a moderate size in the image, while the black and white cat is larger. The black and white cat is sitting on the couch, while the orange tabby is sitting behind it. 
 
      Socratic Model:   This image shows several people at a reception, possibly in a utility room or pet shop. There is a heater in the background, and the people appear to be interacting with a black and white domestic cat. 
 
      BLIP:   A couple of cats sitting on top of a couch 
 
      BEST with only tags:   This image is of a group of cats that bear a striking resemblance to Adolf Hitler. The first two cats, Brandy and Mr. Whiskers, have the characteristic swept-back hair and intense stare that are so often associated with the Nazi leader. The next two cats, Arry and Toots, have similar features, while Casper is unmistakably Hitler-like with his black hair and mustache. 
 
 

 
 
   
 
   
      Human Annotation:   This is an image of an outside settings.The sky is dark blue with a group of clouds to the right and thin clouds to the left.Underneath the group of clouds are a bunch of trees on thin green grass.To the left is a mountain with thin chunks of grass on it and underneath it are trees.Lastly there is a white horse on eating grass by the trees and thin plants in front of it. Surrounding the image is a thick black border on the top and bottom of the image with the word Lonely and an email address on it. 
      BEST:   This image features a small, white horse in the lower right corner. The horse is standing in a grassy field and looks to be quite alone. The mood of the image is one of loneliness and solitude. 
 
      Socratic Model:   A photo of a quiet pastureland, with grazing cows and a lone English setter in the distance. 
 
      BLIP:   A lone horse is grazing in a field 
 
      BEST with only tags:   This image is sad and lonely, depicting a life of solitude. The woman looks out at the viewer with a forlorn expression, seeming to long for companionship. The setting is beautiful and idyllic, but the woman seems to be the only person there. It communicates the feeling of loneliness and isolation that can come from being alone forever. 
 
 

 
 
   
 
   
      Human Annotation:   A black and white bird with a small orange beak and an orange eye is sitting on a giraffe.  The giraffe is the usual, dark tan with brown spots.  It's hard to tell where on the giraffe the bird is perched but it appears that maybe the giraffe's neck is down and the bird is at the base of the neck and the back.  The sky is grey and cloudy. 
      BEST:   This image shows a brown-necked oxpecker perched on the back of a giraffe. The oxpecker is a small bird with a grey beak, and it is hunting for parasites on the giraffe's skin. There is also a giraffe measurer in the image, which is a tool used to measure the height of giraffes. 
 
      Socratic Model:   The two people in the photo are at a watering hole, wild field, or tower. 
 
      BLIP:   A bird perched on the neck of a giraffe 
 
      BEST with only tags:   This image features a pair of oxpeckers perched on the back of a giraffe. The oxpeckers are hunting for insects that are hiding in the fur of the giraffe, and the giraffe seems to be quite content to have them there. 
 
 

 
 
   
 
   
      Human Annotation:   There are a lot of people standing on the beach. There are waves in the water. There are a lot of surf boards surrounding the people.  
      BEST:   This image features a large group of people standing on a sandy beach. They are all looking out at the waves as they surf. There is a large surf competition taking place and the beach is packed with people watching. 
 
      Socratic Model:   Gap opening at the beach. 
 
      BLIP:   A group of people standing on top of a sandy beach 
 
      BEST with only tags:   This image is of a large group of people gathered on a beach to watch a surfing competition. The excitement and energy of the crowd is palpable, and the waves look big and challenging. 
 
 

 
 
   
 
   
      Human Annotation:   This picture is taken inside of a train station. People are standing on a platform. Tall blue and white poles stand on the platform near benches. There is a large blue and white sign standing on the platform near the people. The ceiling of the station is rounded with windows in a row across the top. Two trains are sitting near the platforms. The trains are purple, orange, blue and white. 
      BEST:   This image is of a group of people standing on a platform next to a train. The train is a First Great Western, and it is departing from London Paddington Station. It is a HST (High Speed Train), and the Victoria Train Station can be seen in the background. 
 
      Socratic Model:   

This image captures the interior of a train, with the rolling stock and passengers making their way through the station. 
 
      BLIP:   A group of people standing on a platform next to a train 
 
      BEST with only tags:   This image is of a train station in London. The first train in the image is a Great Western train, and the second train is a TransPennine Express train. The Victoria Train Station is in the background. 
 
 

 
 
   
 
   
      Human Annotation:   There are many people in the park. Some of the people are playing with kites. The kites are colorful. One kite looks like a ladybug. There is grass on the ground of the park. The grass is mostly green. There is a sidewalk in the park. There is a building in the distance. The building is white. There are many trees on the side. Some trees are leafless. The sky is cloudy. There looks to be a pond in the park. 
      BEST:   This image captures a group of people flying kites in a park. The kites are brightly colored and vary in size, from small to large. A few people are seen saluting in the background, while others watch the kites with fascination. 
 
      Socratic Model:   Three people flying kites at an outdoor event. 
 
      BLIP:   A group of people flying kites in a park 
 
      BEST with only tags:   This image features a colorful kite festival taking place at a park. There are many brightly-colored parafoil kites flying in the sky, as well as a few people out on the grass enjoying the spectacle. 
 
 

 
 
   
 
   
      Human Annotation:   A woman is sitting in the drivers seat of a vehicle.  The woman has long red hair and is wearing dark sunglasses.  The woman is parked in front of a large camel.  The camel is standing still on top of some grass.  A person in the back seat is holding a camera in their hands filming the camel .  The hands have a watch on the wrist.  The windshield of the vehicle has two black windshield wipers on it. 
      BEST:   This image shows a woman taking a picture of a camel in a bus. The woman is wearing sunglasses and has her cell phone in her hand. The camel is looking out the window at the bears. 
 
      Socratic Model:   A handler looks on as a Bactrian camel drinks from a watering hole at an outdoor museum. 
 
      BLIP:   A woman taking a picture of a camel in a bus 
 
      BEST with only tags:   This image is of a safari trek. The safari trek is in a geo safari, which is a wild safari. The safari trek is in a jeep, which is a vehicle used for safaris. The jeep has four seats and there are three people in the image. One person is driving and the other two are looking out of the jeep. There is a lion in the background and some trees. 
 
 

 
 
   
 
   
      Human Annotation:   A young man of normal weight, with short brown hair and a small goatee, stares at the camera. He has a slight grin on his face, and one eyebrow is upturned. He  is wearing an orange t-shirt and a very wrinkled orange, tan and black checked sleeveless vest, with a pale blue striped tie. Slightly out of focus in the background is another person in a white t-shirt, sitting on a metal chair, and bed with white and beige pillows on it. 
      BEST:   This image features a young man wearing a colorful vest and tie. The man's outfit is brightly colored and includes an orange tie, argyle sweater, and orange suspenders. He also wears a cravat around his neck. This image is a great example of how to dress up for a formal occasion. 
 
      Socratic Model:   This image shows a person in a business suit, likely at an archive, office, or art school. 
 
      BLIP:   A young man wearing a colorful vest and tie 
 
      BEST with only tags:   This is a man wearing a blue argyle sweater vest over a white dress shirt. He has a orange tie and orange suspenders. He is also wearing a cravat. 
 
 

 
 
   
 
   
      Human Annotation:   Some trains are proceeding on a train track. The trains are red and white and the sun is shining very brightly. The day looks very pleasant and not many clouds are in the sky. There is some tall grass and wheat closer to the camera. There are many suburban houses and buildings located in the background. 
      BEST:   This image features a passenger train with red trim travelling through the Swiss town of Le Locle. The train is of moderate size in the image and appears to be made up of several railcars or passenger cars. 
 
      Socratic Model:   Two passengers sit in a train compartment. 
 
      BLIP:   A red and white train traveling down train tracks 
 
      BEST with only tags:   This image features a train travelling through the Swiss town of Le Locle. The train is a bright yellow colour and is labelled as being operated by the SBB company. 
 
 

 
 
   
 
   
      Human Annotation:   A white topped surface is topped with several dozen long sheaves of wheat in the upper left hand corner of the image. In front of the wheat stands a small sign that says, "Please Do Not Touch"  A larger sign in front of the wheat says "Wheat Weaving." Next to this sign is a spool of silver thread. In front of the spool of thread lies a pair of green handled scissors. Next to the scissors and in the foreground lie a couple of woven articles which look to be the same size as a bracelet. The wheat has been already fully woven in these. 
      BEST:   This image is of a craft project that involves weaving wheat into a chain or a sheaf. 
 
      Socratic Model:   A person reaps wheat in a field with a sickle. 
 
      BLIP:   A table with a bunch of wheat and a pair of scissors 
 
      BEST with only tags:   This image is of a person weaving a chain out of wheat stalks. The wheat is tightly woven together to form a sturdy chain. The chain is likely being used as part of a harvest decoration or craft. 
 
 

 
 
   
 
   
      Human Annotation:   A man with dark hair and wearing a black wet suit is standing on a yellow surfboard edged with lime green. He is riding on a large wave with a with lots of white foamy water filling the back of the wave. He is standing very close to the edge of the surfboard, and is tilting. The ocean water is a pale green color with lots of small white cresting waves surrounding the surfer. 
      BEST:   This image shows a surfer riding a wave in a river. The surfer is wearing a wetsuit and is standing on a green surfboard. The surfer is performing a cutback maneuver and is looking back at the wave. There is also a globesurfer in the image and the skimboarder is performing a trick. 
 
      Socratic Model:   A perfect day to hit the water and enjoy some time rafting. 
 
      BLIP:   A man riding a wave on top of a surfboard 
 
      BEST with only tags:   This image is of a person surfing on a river. They are riding a cutback, which is a type of river surfing. They are using a globesurfer, which is a type of skimboard. 
 
 

 
 
   
 
   
      Human Annotation:   A small tower like brick building is in front of a tall tree. There are two clocks on the tower along with elongated window openings. The tall tree behind the tower is dark green. There is an American flag in the middle of the square surrounded by small trimmed bushes. A brick building is behind the yard and tower. There are trees scattered throughout the yard, which is maintained and green. The sky is very blue and mostly clear with just a few clouds. 
      BEST:   The Dubuque Town Clock is a clock tower sitting in the middle of a park in Dodge County, WI. The clock tower is made of white marble and has a blue clock face with roman numerals on it. The clock face is at the upper left of the image and is small in the image. 
 
      Socratic Model:   The image shows a person in front of a clock tower. 
 
      BLIP:   A tall clock tower sitting in the middle of a park 
 
      BEST with only tags:   The image shows a clock tower in the center of a town. The clock tower is in Dodge County, Wisconsin and is known as the Dubuque Town Clock. The clock tower is also in Lagrange County, Indiana and is known as the Clock Tower. 
 
 

 
 
   
 
   
      Human Annotation:   This image is of a man wearing protective gear, skateboarding at a skate park. He is wearing a white tee with a yellow and black graphic on it and a pair of khaki colored cargo shorts, white tube socks, and black and white high-top shoes. His skateboard is yellow and green with white wheels. Only one of his skate trucks is touching the ground, as the image shows the skater performing a trick. There is a person watching from the back ground and other people standing or skating who can't be seen well. 
      BEST:   This image is of a skateboarder doing a trick at the hazard county skatepark. In the image, the skateboarder is in the middle of the image and is large. The skateboard is at the lower middle of the image and is moderate-sized. The background is of the skatepark and is blurred. 
 
      Socratic Model:   A photo of a skateboarder at a nursing home. 
 
      BLIP:   A man riding a skateboard up the side of a ramp 
 
      BEST with only tags:   This image is of a skateboarder at the hazard county skatepark. He is performing a vert trick on his skateboard. The skatepark has a variety of obstacles for skaters to use, including a halfpipe, a vert ramp, and a bowl. 
 
 

 
 
   
 
   
      Human Annotation:   A boy is sitting at a small dock. The boat has small wooden benches on it. Above the boat is a bridge that has people walking on it. 
      BEST:   This image features the Longfellow Bridge, the Crim Dell Bridge, and the Boston Commons in Boston, Massachusetts. The Longfellow Bridge is a suspension bridge that crosses the Charles River. The Crim Dell Bridge is a wrought iron bridge that crosses the Crim Dell. The Boston Commons is a park in the center of downtown Boston. 
 
      Socratic Model:   A riverboat on a canal in an urban area. 
 
      BLIP:   A boat that is sitting in the water 
 
      BEST with only tags:   This image shows the Longfellow Bridge, the Crim Dell Bridge, and the Boston Commons in Boston, Massachusetts. The Longfellow Bridge is a historic bridge that crosses the Charles River. The Crim Dell Bridge is a small pedestrian bridge that crosses a creek on the campus of the College of William and Mary. The Boston Commons is a public park in the center of Boston. 
 
 

 
 
   
 
   
      Human Annotation:   A tall giraffe stands alone outside. The animal is seen from the back side standing next to some shrubs that are almost leafless. It is daytime and the sky is clear and blue. In the sky you can see a bird flying with its wings wide open.  
      BEST:   This image features a giraffe in the foreground with a large bush behind it. There is also a flying blackbird in the sky and a horse in the background. The giraffe is brown with a white face and black spots, the bird is black, and the horse is black or dark brown. 
 
      Socratic Model:   A person looks up at a tall, towering water tower with a giraffe in the background. 
 
      BLIP:   A giraffe standing in the middle of a forest 
 
      BEST with only tags:   This image features a giraffe that is being hunted by a group of oxpeckers. The giraffe is standing in a clearing in a wooded area, and the birds are perched on its back and sides, picking at parasites on its skin. The giraffe seems to be unconcerned by the birds, and its long neck allows it to keep watch over the surrounding area. 
 
 

 
 
   
 
   
      Human Annotation:   The boy is sitting on the bicycle. There is a dog fighting at the boys like. The dog is being playful with the boy the bike is silver and red. The dog is a light tan color. The boy is wearing a yellow black and white T-shirt. The boy is wearing blue jeans. There are trees and trees with flowers in the background. The trees directly behind the boy have red flowers. 
      BEST:   This image is of a young boy on a bicycle. He is looking ahead as he rides, with a smile on his face. The bike is new and shiny, and the boy looks proud to be riding it. There is a curbstone in the image, as well as a small dog that is sniffing the ground. 
 
      Socratic Model:   A solitary Nicaraguan youth hostel plaza medina. 
 
      BLIP:   A man riding a bike with a dog on the back 
 
      BEST with only tags:   This is a photo of a young boy on a bicycle in the town of Hoduras. The bike is battered and old, and the boy looks like he's enjoying his ride. 
 
 

 
 
   
 
   
      Human Annotation:   Two people are skiing down a snow covered snow slope.  One person is wearing a black and red snow jacket.  The other skier is wearing a blue and black ski jacket.  Both skiers are wearing hats and goggles.  Two yellow poles are upright in the snow behind the skiers.  There is hill on a decline behind the skiers. 
      BEST:   This image is of a group of children snowboarding. The two riders in the foreground are a boy and a girl, both wearing Burton brand snowboarding gear. The boy is on a twin board, while the girl is on a single board. The background features more riders, all of whom are adults. The mountain in the background is La Parva, located in Chile. 
 
      Socratic Model:   A group of people enjoying a day of skiing and snowboarding at a resort. 
 
      BLIP:   A couple of people riding skis down a snow covered slope 
 
      BEST with only tags:   This image is a photo of some snowboard kids riding on their Burton twin snowboards down a ski slope at La Parva, in Chile. They seem to be having a lot of fun as they speed down the mountain. 
 
 

 
 
   
 
   
      Human Annotation:   A cat is inside of a sink. The cat is brown and striped with black and is looking at the camera. The cat has a collar on and the eyes are big and yellow.
 
      BEST:   This image shows a sink with a small washbowl and a citikitty faucet. There is a toothbrush holder on the left side of the sink and two toothbrushes inside it. There is also a tabby cat by the sink. 
 
      Socratic Model:   A tabby cat takes a breather next to a sink. 
 
      BLIP:   A cat is sitting in a bathroom sink 
 
      BEST with only tags:   This image shows a houzer sink with a washbowl on top. The washbowl has a citikitty faucet and a cat fountain in the middle of it. There are also sinks of gandy around the edge of the washbowl. 
 
 

 
 
   
 
   
      Human Annotation:   a man is on a skateboard. he is wearing all black. his skateboard is black as well. the skateboarder is wearing a hat. 
      BEST:   In this image, a man is riding a skateboard up a ramp. The skateboard is blurry, or in mid-air, or above the man and is small in the image. The man is doing a trick and is in the middle of the image. 
 
      Socratic Model:   A skateboarder flips tricks at a park or plaza. 
 
      BLIP:   A man riding a skateboard up the side of a ramp 
 
      BEST with only tags:   This image features a skateboarder performing a vert wallie. The skateboarder is performing the trick on a half-pipe, and is surrounded by a green and blue background. The skateboarder is wearing a black shirt and pants, and is shown in mid-air, with his arms outstretched. 
 
 

 
 
   
 
   
      Human Annotation:   A picture of a bathroom with a bath tub and toilet. There is a white sink  under a large mirror in the bathroom. There are lights mounted in teh ceiling. There is a black and white shower curtain on the bath tub. There are many white cabinets under the sink. There is a metal handle next to the shower.  
      BEST:   This image is of a master bathroom with granite countertops. The sink is white and the toilet is ceramic and white. The bathtub is also white and there is brushed nickel hardware. 
 
      Socratic Model:   A photo of an empty bathroom or shower, with tile on the walls and floor. 
 
      BLIP:   A bathroom with two sinks, a toilet, and a bathtub 
 
      BEST with only tags:   This bathroom remodel is complete with a granite countertop and brushed nickel fixtures. The luxurious turnberry towers bathtub is the perfect place to relax after a long day. 
 
 

 
 
   
 
   
      Human Annotation:   A group of people are skiing down a slope, apparently in a competition. The skier in front is wearing a red and white ski suit. The second skier is wearing a white and blue ski suit. Behind this man is another in a white and black suit. There is another skier directly behind him, though he is barely visible. There is a red snow fence to the left, and people standing near the fence watching the skiers. 
      BEST:   This image is of two skiers racing down a hill. One is in the lead and the other is close behind. The skier in the lead has red stripes on his skis, and the other skier has black boots. There is a flag in the background, and snowboarding pants in the foreground. 
 
      Socratic Model:   A sporty photo taken at a ski resort. 
 
      BLIP:   A group of men riding skis down a snow covered slope 
 
      BEST with only tags:   This image is of the Nordic Combined World Cup Finals in Lahti, Finland. Ole Einar Bjoerndalen of Norway is in first place, while Jason Lamy Chappuis of France trails in second. The race is a combination of ski jumping and cross-country skiing. 
 
 

 
 
   
 
   
      Human Annotation:   A lady is holding stringer in her hand.  The party stringer are blue purple and white.  There are several people in the room.  The little girl is standing next to the lady.  There is red construction paper on the table.  The markers on the table has a yellow top.  The lady is wearing a gray tank top.  Another lady is sitting at the table.  The chair near the lady is black.  There are two black chairs with no one sitting in them. 
      BEST:   This image features a group of people gathered around a table, working on various crafts projects. There is a kite in the foreground, and several streamers blowing in the breeze. The woman at the center of the image has long brown hair, and is wearing a wristband. 
 
      Socratic Model:   This image depicts three people in a classroom setting. There are various decorative elements in the room, including a balloon sail, paper chain, and fanion. This suggests that the photo was taken in a festive or celebratory environment. 
 
      BLIP:   A group of people gathered around a table 
 
      BEST with only tags:   This image features a few different summer bridge activities. There are crepe streamers in the background, as well as some balloons being twisted into shapes. There is also a card being made. 
 
 

 
 
   
 
   
      Human Annotation:   A man wearing a black jacket and a green tie is standing behind a white table. There is a cake on top of the table. The man is wearing a black hat and holding a knife.  
      BEST:   This image is of a man in a suit and tie standing next to a cake. The cake is multileveled and has writing on it. The man is looking down at the cake and looks like he's about to cut it. There is a blurry person in the background. 
 
      Socratic Model:   One person celebrating with a birthday cake at a delicatessen, reception, or archive. 
 
      BLIP:   A man in a suit and tie standing next to a cake 
 
      BEST with only tags:   A cakeman is seen in this image with a grooms cake. The cake boss is seen happy birthday ken with a yellow cake. 
 
 

 
 
   
 
   
      Human Annotation:   A woman is taking a picture in the mirror. She is looking into the mirror with a black camera she is holding. The mirror is round and white and the tiles of the wall are also white. 
      BEST:   This image is a woman taking a picture of herself in a mirror. She is in the middle of the image and is moderately-sized. She is looking at the camera and seems to be posing for the picture. There is a mirror behind her that shows her reflection. There is also a shower in the background with a fogless shower mirror. 
 
      Socratic Model:   A woman stares at her reflection in a bathroom mirror. 
 
      BLIP:   A woman taking a picture of herself in a mirror 
 
      BEST with only tags:   This image is of a woman looking in a mirror. The mirror is fogless, so she can see herself clearly. She has a look of concentration on her face, as if she is studying her reflection. The mirror is mounted on a wall in a bathroom, and there is a showerhead visible behind her. 
 
 

 
 
   
 
   
      Human Annotation:   TWO CELL PHONES ON THE TABLE.THEY BOTH ARE DARK IN COLOR A ND ARE BLACBERRYS.THERE ARE THREE CUTTING KNIVES.ONE KNIFE IS BETWEEN THE TWO PHONES.THERE IS A THIRD PHONE WITH A KNIFE LYING OVER IT. 
      BEST:   This image showcases a variety of different knives, all of which are pocket knives. The knife on the upper right is a switchblade, while the knife to the right is a standard pocket knife. The blackberry wireless phone is on the left side of the image, and the blackberry portable phone is in the lower middle. 
 
      Socratic Model:   A person looks through a pile of knives. 
 
      BLIP:   A group of cell phones sitting on top of a table 
 
      BEST with only tags:   This image features a selection of knives from gpknives, edc knives, kershaw knifes, mtech knives, and benchmade knife. The knives are all displayed in their open positions to show the different blade shapes and sizes. This image provides a good overview of the many different types of knives that are available from these brands. 
 
 

 
 
   
 
   
      Human Annotation:   A person is standing in skis on top of snow that has a lot of tracks in it. There are several light posts behind the person.  
      BEST:   This image features a man skiing down a snow covered slope in the dark. He is wearing blue pants and skis, and the slopes behind him are lit up with bright lights. There is also a ski resort in the background, with buildings and ski lifts. 
 
      Socratic Model:   A cold and empty ski slope. 
 
      BLIP:   A man riding skis down a snow covered slope 
 
      BEST with only tags:   This image features a skier on a downhill slope at night. The skier is wearing killtec gear and appears to be having a great time. The piste is well lit up, making for a fun and safe skiing experience. 
 
 

 
 
   
 
   
      Human Annotation:   This is an image of  some people. The people are in a group. The people are playing video games. The people are holding controllers. The controllers are white. The man in the middle has a backwards hat on. The hat is black. The man has thin glasses on. The man has a yellow shirt on. The man has light blue jeans on. 
      BEST:   This image is of a group of people playing a video game. The people are all using Wii controllers to play the game. One person is sitting on a couch, and another is standing next to them. 
 
      Socratic Model:   People enjoying a game together in a college dorm room. 
 
      BLIP:   A group of people playing a video game 
 
      BEST with only tags:   This image is of a group of friends playing various Wii games together. They are all smiling and enjoying themselves. In the foreground, two people are playing Mario Kart Wii, while in the background three people are playing Wii Party. One person is holding a puppy from the Nintendogs series, and another is holding a Gootecks plush toy. 
 
 

 
 
   
 
   
      Human Annotation:   A smile is represented on a blue plate utilizing food.  Two eyes are displayed using oranges.  A chili pepper represents a nose and a banana represents a smile.  The circular blue dish is sitting on top of a wooden plank table.  There is a light casted on the left of the plate.  The blue ceramic plate has swirls of white around it. 
      BEST:   This image features a blue plate with two oranges and a banana on it. The oranges are orange in color, while the banana is a deep red. There is also a chili pepper on the plate, which adds a splash of color. 
 
      Socratic Model:   An empty table with snacks and fruit, waiting for the next customer. 
 
      BLIP:   A blue plate with two oranges and a banana on it 
 
      BEST with only tags:   This is a picture of a blue orange. It is on a plate with other fruit. The blue orange looks like it is peeled, and the plate has a blue design on it. 
 
 

 
 
   
 
   
      Human Annotation:   Two birds stand next to each other.  The birds seem to be of the same species, only male and female.  One bird has an elaborate growth coming from the top of its head.  Its head is black with white stripes.  The other bird's head does not have a growth or any stripes.  The birds are standing on flat ground next to some green grass. 
      BEST:   This image features two small birds, possibly California quail or California valley quail, standing next to each other on a road. The bird on the left has a black tail with white tips, while the bird on the right has a brown tail with black stripes. Both birds are either males or adult females, as they are exhibiting the characteristic strutting behavior of these birds. 
 
      Socratic Model:   The California quail is a species of the quail family. 
 
      BLIP:   A couple of birds standing next to each other on a road 
 
      BEST with only tags:   This image is of a male and female California Valley Quail. The male is shown on the left and the female is on the right. They are both native to California and can be found in grasslands and open woodlands. These quail are about 10-12 inches long and are brown with black spots. They are a popular game bird, but are also considered a conservation concern as their populations have declined in recent years. 
 
 

 
 
   
 
   
      Human Annotation:   This photo is taken outside on a cloudy day. A man and woman are standing on a mountain. The woman is wearing a purple jacket and purple pants. The man is wearing a red jacket and dark pants. They both are standing on skis and holding trekking poles in their hands. Leafless trees can be seen below the mountain that they are standing on. 
      BEST:   This image features skiers on a mountain in New Hampshire. The skiers are wearing blue pants and purple ski jackets. They are skiing down the mountain on skis with bindings. There is a dandy lift in the background of the image. 
 
      Socratic Model:   Two people enjoying a day skiing. 
 
      BLIP:   A couple of people riding skis down a snow covered slope 
 
      BEST with only tags:   This image features skiers at Campgaw Mountain in New Hampshire. The skiers are shown using the Dandy lifts to get up the mountain. The image is colorful and cheerful, providing a positive view of skiing. 
 
 

 
 
   
 
   
      Human Annotation:   A surfer is riding a wave in the ocean.  The male is wearing a wet suit with a stripe down the side of the leg and arm.  There is a paddle in his hands.  The board is yellow and blue.  The wave has white foam on the top and crashing down with white foam.  There is sunlight shining on the ocean in the background.  The water is blue and green and appears a bit choppy. 
      BEST:   This image shows a man riding a wave on top of a surfboard. The paddle is in the middle of the image and is small in comparison to the man and the surfboard. The surfboard is a bright yellow and the man is wearing a wet suit. This image was taken at Steamer Lane in Santa Cruz, California. 
 
      Socratic Model:   A riderless surfboard bobs in the water. 
 
      BLIP:   A man riding a wave on top of a surfboard 
 
      BEST with only tags:   This image is of a person paddle surfing in the waves at Steamer Lane. The waves are tall and the surfer looks to be having a lot of fun. 
 
 

 
 
   
 
   
      Human Annotation:   Two black cubs are roaming in an enclosed area.  There are stone walls behind the two cubs.  Green shrubs  are in the front of the enclosure.  The cubs appear to be grazing on the ground.  A tub like structure is in the back of the left side.  The two cubs are on the top level and beneath them is a step to a lower level. 
      BEST:   This is an image of a sloth bear cub. The black cub is at the left of the image and is moderate-sized. The bearfoots or bear boy is at the right of the image and is also moderate-sized. 
 
      Socratic Model:   A bear cub enjoying a day at the zoo. 
 
      BLIP:   A couple of black bears standing next to each other 
 
      BEST with only tags:   This image features a black cub playing with a sloth bear and an andean bear. The cub has bearfoots, which are specially adapted paws that allow them to climb and walk on all fours like a bear. They are also known as bear boys. 
 
 

 
 
   
 
   
      Human Annotation:   A plane that is red and blue is flying in the air. There are several white clouds behind the plane. There is a white stripe on the plane.  
      BEST:   In this image, a red fighter jet is flying in the sky. The plane is surrounded by other red planes, forming a kind of formation. The plane is a BAE Hawk or a Red Falcon, and it is flying high in the sky. 
 
      Socratic Model:   A jet takes off from a runway. 
 
      BLIP:   A red and white plane flying in the sky 
 
      BEST with only tags:   This image is of a red jet flying in the sky. It is surrounded by red arrows, which are flying in the same direction as the jet. There is also a red falcon flying nearby. 
 
 

 
 
   
 
   
      Human Annotation:   A British Royal carriage is heading down the street. A Rolls Royce can also be seen the background. The carriage is being drawn by two horses. The driver is wearing a tri-corner hat, one is wearing a helmet with a red plum, and the others are wearing black hats. The carriage is black and has black and red wheels. Everyone on the carriage is dressed in red and gold. 
      BEST:   This image shows a group of people riding in a horse drawn carriage. The carriage is pulled by two horses and is decorated with gold trim. The passengers in the carriage are dressed in formal attire, and the man in the front is wearing a red and gold coat. This image is from a trooping the colour ceremony, which is a celebration of the British monarchy. 
 
      Socratic Model:   This image captures the grandeur and elegance of a horse-drawn carriage. fit for a royal event or a grand occasion. 
 
      BLIP:   A group of people riding in a horse drawn carriage 
 
      BEST with only tags:   This image is of a royal carriage procession. The carriage is blue and gold, and being pulled by four horses. There are many people lining the streets to watch the procession, including several members of the royal household cavalry. 
 
 

 
 
   
 
   
      Human Annotation:   The man is looking at his blow dryer. The blow dryer is a light blue the man has a towel around his neck. The towel is a light pink color. The man is wearing a blue-and-white-striped shirt. There is a plant to the right of the man against the wall. There is a door behind the man that is a light brown color. 
      BEST:   This image is of a man drying his hair with a blow dryer. The man has his head down and is holding his nose. There is a leaf in the background and the blow dryer is plugged in. 
 
      Socratic Model:   This fun photo was taken at a recreation room, beauty salon, or art school! 
 
      BLIP:   A man is drying his hair with a hair dryer 
 
      BEST with only tags:   This is an image of a woman drying her hair with a professional hair dryer. The hairdryer has a steamer attachment, which emits hot steam to help dry the hair more quickly. The woman has her hair up in a towel, to protect it from the heat of the dryer. 
 
 

 
 
   
 
   
      Human Annotation:   This photo is taken inside of a living room of a home. A brown and black dog is sitting on a red leather couch. A red and white tie is hanging around the dog's neck. There is a colorful area rug on the floor. Different objects can be seen on top of a brown cabinet behind the dog. 
      BEST:   This is a picture of a cute puggle named Puggsy. In the image, Puggsy is wearing a bright red tie. The tie is a large focal point of the image and draws attention to Puggsy's face. This adds interest to the picture and makes it more visually appealing. 
 
      Socratic Model:   A person works from home with their Brabancon griffon. 
 
      BLIP:   A small dog wearing a red and white neck tie 
 
      BEST with only tags:   This image is of a cute puggle. Puggles are a mix of a pug and a beagle, and they are often referred to as puginese or puggabulls. They are often very cute and loveable dogs. This particular puggle is looking at the camera with a sweet expression, and he seems to be posing for the picture. 
 
 

 
 
   
 
   
      Human Annotation:   A bus is on the street. It is currently getting ready to pick some people up and drop some off. The bus is white, purple, and red on the top. The building has a lot of moss on it. 
      BEST:   This image shows a bus stop with a Transdev bus and a KMB bus stopped at it. The Transdev bus is white and purple, while the KMB bus is red and white. 
 
      Socratic Model:   A photo of a public transport bus stop. 
 
      BLIP:   A bus is parked at a bus stop 
 
      BEST with only tags:   This image shows a bus stopped at a transit stop. The bus is from the Transdev company and is model number KMB-TW15. It is a city bus that is used for short-distance travel within a city or urban area. It has intercity transit capabilities, which means that it can also be used for travel between cities. 
 
 

 
 
   
 
   
      Human Annotation:   A rooster is standing on the grass. The rooster has a red face and a black and orange body. There is a fence behind the rooster.  
      BEST:   This image features a rooster standing in a field of grass next to a fence. The rooster is a large and imposing figure in the image, and its plumage is very colorful. This bird is likely a dorking, boston roundhead, gallic rooster, or cockerel, and it is likely very proud of its appearance. 
 
      Socratic Model:   A rooster standing in a field. 
 
      BLIP:   A rooster standing in the grass next to a fence 
 
      BEST with only tags:   This image is of a dorking, boston roundhead, gallic rooster, and cockerel. The dorking is a breed of chicken originating in England. The boston roundhead is a breed of chicken originating in the United States. The gallic rooster is a breed of chicken originating in France. The cockerel is a male chicken under one year old. 
 
 

 
 
   
 
   
      Human Annotation:   A little girl with a brown hat on and she has long hair underneath the hat.  She is wearing a blue and pink top that is a little off her shoulder .  She is eating a piece of cake out of her hands her fingers have cartoon character wrapped around them and a person in black clothing is sitting on the right side of her. 
      BEST:   This image is of a young girl wearing a cupcake hat and cake fashion nugget. She has a piece of bread in her mouth and is looking to the side. 
 
      Socratic Model:   The shop's firstborn enjoying their favorite snack. 
 
      BLIP:   A little girl with a hat eating a doughnut 
 
      BEST with only tags:   This image is of a girl wearing a cupcake hat and cake fashion nugget. She is also wearing a pie hat and looks to be a junk food junkie. She is a boneless girl, likely due to her unhealthy diet. 
 
 

 
 
   
 
   
      Human Annotation:   Family and friends are gathered together outside in a back yard of someone's home. They all are sitting together on a picnic table eating and drinking. There is a large tree by the people with green leafs. The grass is also green.  
      BEST:   This image shows a group of people sitting around a picnic table. They are all enjoying their lunch, and there is a cooler and some backpacks visible in the background. 
 
      Socratic Model:   Many people enjoying the outdoors at a youth hostel, picnic area, or outdoor cabin. 
 
      BLIP:   A group of people sitting around a picnic table 
 
      BEST with only tags:   This image is of a group of people gathered around a picnic table, eating and enjoying their time together. There are several coolers visible in the background, as well as a few baskets of food. The people in the image look to be having a good time. 
 
 

 
 
   
 
   
      Human Annotation:   A tennis match is about to begin on an outdoor court. It is a clear day with a blue sky and small fluffy clouds. In the background there are white outbuildings with gray, metal roofs surrounded by trees. Nearer to the court, on a grassy slope,there are several rows of spectators dressed casually and for mild weather. The spectators sit on the ground or in chairs. In the foreground is the tennis court. The playing surface is natural grass with white lines that shows wear in some areas where play is frequent. The court is surrounded on the spectator side by a low green carrier. To the left of the spectator side, the court is surrounded by a higher, dark barrier. People wait along this barrier to enter the court to retrieve balls. On the court two players are present along with one official or coach. One player is warming up by tossing the ball in the air to hit. The other is standing next to the official. A full court net separates them. Because of the time of day, and direction of the sun, people cast shadows across the court. 
      BEST:   This image features a man serving a tennis ball on a tennis court. The man is dressed in white and appears to be at a professional tennis match. The court is surrounded by a green fence and there are spectators in the background. The ball is white and the racquet is black. 
 
      Socratic Model:   A group of people playing tennis at an outdoor court. 
 
      BLIP:   A man serving a tennis ball on a tennis court 
 
      BEST with only tags:   This image captures a tennis player serving the ball. The player is dressed in white and their opponent is in the background, also dressed in white. The tennis court is green and the sky is blue. This image was taken at Wimbledon, an annual tennis tournament that takes place in England. 
 
 

 
 
   
 
   
      Human Annotation:   This is an image of a large building. On top of the building there are two flags that are red, white, and blue. In front of the building there are several people that are wearing long red coats. There are two people that are riding horses. There are also two other horses that can be seen attached to a wagon.  
      BEST:   This image shows a horse guard parade taking place in the courtyard of the palace of whitehall. The red uniforms of the horse guards stand out against the gray stone of the buildings. Several carriages are visible in the background, pulled by horses harnessed to a wagon. 
 
      Socratic Model:   A majestic entrance hall, befitting of royalty. 
 
      BLIP:   A group of people riding horses in front of a building 
 
      BEST with only tags:   This image shows the Horse Guards Parade in London. The Horse Guards is a ceremonial unit of the British Army and is responsible for mounted cavalry. The parade is held in the courtyard of the Palace of Whitehall, which is the official residence of the British monarch. The building in the background is Somerset House, which is a government building that houses several ministries. 
 
 

 
 
   
 
   
      Human Annotation:   There is hitter getting ready to swing at the ball that has just been thrown by the pitcher. The pitcher is wearing a black shirt with gray pants and red socks while the hitter is wearing gray pants, dark blue shirt, and black socks. The umpire and the catcher is squatting down anticipating the play. The field is a mixture of dirt sand green grass. The image was taken through a metal fence.  
      BEST:   This image features a baseball player in the middle of a batting practice session. The player is at the plate, and is swinging the bat at a ball. The catcher is crouching in the background, and there is a fence behind him. There are also trees in the background, which make the image blurry. 
 
      Socratic Model:   A A group of people enjoying a game of baseball. 
 
      BLIP:   A baseball player holding a bat on top of a field 
 
      BEST with only tags:   This image features a group of people playing a softball game. In the foreground, two people are batting, while in the background a few people are playing defense as a backstop. This image creates a sense of excitement and fun, showing that even adults can enjoy a casual game of baseball or softball. 
 
 

 
 
   
 
   
      Human Annotation:   The sky is cloudy and the clouds are thick and fluffy. The boy is holding a kite roller. The boy is flying the kite.  The handle on the roller is red. The wind is blowing in the boys hair. The boys hair is dark brown. The boy is not wearing a shirt. The kite has a long tail. The kite is multi colored. The kite is shaped like a triangle. 
      BEST:   This image shows a small, kite-shaped object at the upper right corner of the image. The object is made of several different colors, and it is flying in the air. There is a boy in the beach in the lower middle of the image, and he is looking at the camera. 
 
      Socratic Model:   The kite soars through the sky, a beautiful sight to behold. 
 
      BLIP:   A boy flying a kite on a cloudy day 
 
      BEST with only tags:   This image is of a man flying a kite. The kite is a large, colorful stunt kite, and the man appears to be having a lot of fun flying it. The background is a cloudy sky, and the image is surrounded by a light blue border. 
 
 

 
 
   
 
   
      Human Annotation:   There is a wood fence with bushes and trees in front of them. There is a large brown cow behind the fence. The cow is standing in a field of grass. The sky is blue and there are no clouds in the sky.  
      BEST:   This image features a brown cow standing next to a wooden fence in a field. The cow is a canadienne cow, a breed of cattle from Quebec, Canada. The ox, or brown cow, is at the middle of the image and is moderate-sized in the image. The bull is brown and is grazing in the heather in the background. 
 
      Socratic Model:   A peaceful pasture scene with claret cattle grazing. 
 
      BLIP:   A cow standing in a field behind a fence 
 
      BEST with only tags:   This image is of a Canadian cow grazing in a field of heather. The cow is a tarentaise, a type of cattle that is well-adapted to cold climates. In the background, a bull can be seen grazing on the other side of a wire fence. 
 
 

 
 
   
 
   
      Human Annotation:   A mountain with lots of trees on it is behind three people skiing. There is a yellow sign in the snow. There is a person with a blue shirt  on standing next to the sign.  
      BEST:   This image features a man cross country skiing in the mountains of Austria. The snow is pristine and the scenery is breathtaking. The man is wearing a blue jacket and a red hat, and his skis are crossing each other in front of him. 
 
      Socratic Model:   Two athletes enjoy the winter scenery while skiing down a snowy mountain. 
 
      BLIP:   A group of people cross country skiing in the snow 
 
      BEST with only tags:   This image is of a cross country ski resort in Austria. The ski resort is called Ski Amade and it is located in the town of Ellmau. The image shows a skier crossing a bridge over a river with the mountains in the background. 
 
 

 
 
   
 
   
      Human Annotation:   There are many airplane-shaped kites in the sky. They are red and black. On the ground people are controlling the kites and watching them. There is dirt on the ground and grass on the ground further away. In the back there are buildings of different colors. Behind the buildings are tall trees. 
      BEST:   This image features a kite festival taking place in Mysore City. People can be seen flying kites of all shapes and sizes in the background, while a large red banner hangs in the foreground. A small red plane is also visible in the left corner of the image. 
 
      Socratic Model:   A group of people fly kites in a residential area. 
 
      BLIP:   A group of people flying kites in the sky 
 
      BEST with only tags:   This image is of a kite festival taking place in Mysore City. People can be seen flying kites of all shapes and sizes in the background, while a large parafoil kite is in the foreground. 
 
 

 
 
   
 
   
      Human Annotation:   The room is nice and clean. There's a white coffee table in front of the couch. The coffee table has flowers on top of it. The flowers are in a short white round thanks. The flowers are pink. The flowers are roses. There are two candle cups on the coffee table. There are four pillows on the couch. Two of the pillows are striped with hot pink. 
      BEST:   This image features a white table ottoman with a storage compartment. The ottoman is upholstered in leather and rests on four wooden legs. There is a coffee table in front of the ottoman, and a bouquet of roses in a pink basket to the side. 
 
      Socratic Model:   An empty room with a coffee table and a dining table. 
 
      BLIP:   A white coffee table with pink flowers on top of it 
 
      BEST with only tags:   This image features a table ottoman with a storage compartment. The ottoman is made of leather and has a coffee table style top. The ottoman is from Ikea and is called the Kramfors. 
 
 

 
 
   
 
   
      Human Annotation:   three people are standing in the ocean water. they are all holding onto some surfboards. the surfboards are blue in color. 
      BEST:   This image features a couple of people in the water with surfboards. They are presumably taking surf lessons, and may be beginners. The surfboards are blue, and the woman is standing on her board in the water. The man is also in the water, and the kite flying in the background may be providing some entertainment for them. 
 
      Socratic Model:   Three friends take a break from swimming to enjoy the view of the natural landscape. 
 
      BLIP:   A couple of people that are standing in the water with surfboards 
 
      BEST with only tags:   This is an image of a group of people learning to surf. There are several people in the water, and some on the shore. There are also several surfboards and a few skimboards in the picture. The water looks like it's a light blue color and the sky is a bright blue. 
 
 

 
 
   
 
   
      Human Annotation:   A brown dog is sitting on some blankets. There is a small box in front of the dog. There is a brown bag sitting next to the dog.  
      BEST:   This image is of a pile of clothes that are overstuffed and appear to be overpacked. There is a brownish dog at the left of the image that is a breed known as a Staffordshire bull terrier or pitbull. There is also a brown pillow in the middle of the image and a brown purse at the bottom right corner. 
 
      Socratic Model:   A room full of laundry and a dog. 
 
      BLIP:   A dog sitting on top of a pile of clothes 
 
      BEST with only tags:   This image is of a large, muscular pitbull with a goofy grin on its face. It is sitting in a pile of its own belongings, which are spilling out of a large suitcase and onto the floor. The dog looks very content and seems to be enjoying its luxurious lifestyle. 
 
 

 
 
   
 
   
      Human Annotation:   This picture is taken inside of a building. People are shopping at different booths and tables that are set up in the building. A man is wearing a black leather jacket and blue jean pants. A clock is hanging from a ceiling above his head. There is a tall brown and white pole standing near the clock in the room. 
      BEST:   This image features a market in Saint John, Canada. There are several stalls selling a variety of items, including produce, hanging baskets, wreaths, and artificial plants. There is also a bus stop and a clock tower in the image. 
 
      Socratic Model:   A bustling indoor market, full of people and activity. 
 
      BLIP:   A group of people walking through a store 
 
      BEST with only tags:   This image is of the Saint John City Market, which is located in the heart of the city. The market is open every day except for Christmas, and is home to a variety of vendors selling fresh produce, meat, fish, and baked goods. There is also a section of the market devoted to arts and crafts. 
 
 

 
 
   
 
   
      Human Annotation:   This photo is taken on a mountain. People are standing around watching a person ski on the mountain. The mountain is covered with snow. There is a tall light pole standing on the mountain. Trees surround the front part of the mountain. Some of the people are standing near a red tent. A man can be seen under the tent with equipment in front of him.  
      BEST:   This image is of a ski resort in Canaan Valley, West Virginia. There are several people visible on the slopes, including a skier in blue pants and a snowboarder. A man is using the rink in the foreground and a group of women are watching a game in the background. 
 
      Socratic Model:   The people in this photo appear to be enjoying a day out skiing. 
 
      BLIP:   A group of people standing on top of a snow covered slope 
 
      BEST with only tags:   This image is of a ski resort in the Canaan Valley region of West Virginia. The ski resort has a number of different slopes, as well as a ski school and ski rentals. 
 
 

 
 
   
 
   
      Human Annotation:   A large kite of a teddy bear floats in the sky while a crowd watches it and other kites in the air.  The teddy bear kite, the bear is brown with yellow ears, paws and nose.  He is wearing a red t shirt. The people gathered around are all dressed in outdoor winter clothing and there is snow on the ground.  
      BEST:   This image is of a group of people flying kites in the snow. There are a variety of different kites in the air, including a brown teddy bear kite, a large kite, and a balloon kite. The ground is covered in snow and there are a few trees in the background. 
 
      Socratic Model:   A person ice skating outdoors with a kite. 
 
      BLIP:   A group of people flying kites in the snow
[truncated: 126,746 more chars]
